# Supplementary material
Source: HighWire-hosted journal article supplement (https://gut.bmj.com/content/69/12/2131)
Supplement: inline-supplementary-material-1 [file inline-supplementary-material-1.xlsx]

## Sheet: ST1
Supplementary Table 1| Summary on statistics of the host properties and clinical indexes from original and validation cohorts.
Classification	Full name of the index	Symbol	Original cohort			Validation cohort
			ESRD patients (n=223) (mean±s.d.)	Healthy controls (n=69) (mean±s.d.)	P-value (Student's t test)	ESRD patients (n=12) (mean ± s.d.)	Healthy controls (n=12) (mean ± s.d.)	P-value (Student's t test)
Host property (Basic information)	Gender	Gender (F/M)	51/172	32/37	0.0003713 (Fisher's exact test)	6/6	5/7	1 (Fisher's exact test)
Host property (Basic information)	Age (year)	Age	53.04 ± 11.42	47.86 ± 10.94	0.00089454	53.75 ± 12.58	58.33 ± 8.53	0.309055
Host property (Basic information)	Age stage (20-39/40-59/>60)	Age stage	30/119/74	15/39/15	0.3678794 (Kruskal-Wallis rank sum test)	2/5/5	0/5/7	0.8166394 (Kruskal-Wallis rank sum test)
Host property (Basic information)	Body Mass Index (kg per m^2)	BMI	23.68 ± 4.23	23.7 ± 2.68	0.96716	25.23 ± 4.71	22.71 ± 2.29	0.114305
Host property (Basic information)	Height (cm)	Height	167.4 ± 8.24	168.9 ± 6.63	0.137647	163.67 ± 9.62	161.52 ± 7.6	0.550057
Host property (Basic information)	Weight (kg)	Weight	66.64 ± 14.2	67.62 ± 8.74	0.501511	68.54 ± 18.86	59.58 ± 9.98	0.164388
Host property (Basic information)	Faecal pH	Faecal_pH	7.17 ± 0.71	6.55 ± 0.7	1.36827e-07	n.d.	n.d.	n.d.
Host property (Basic information)	Ethnicity (Han/other minorities)	Ethnicity (Han/other)	8/215	4/65	0.4867574 (Fisher's exact test)	n.d.	n.d.	n.d.
Host property (Disease)	**Protopathy	Protopathy (7/6/5/4/3/2/1)	19/5/12/6/32/73/76	n.d.	n.d.	0/0/0/0/1/4/7	n.d.	n.d.
Host property (Disease)	Tumor	Tumor (Y/N)	4/166	0/69	0.3270648 (Fisher's exact test)	0/10	0/12	n.d.
Host property (Disease)	Renal osteopathy	RO (Y/N)	95/127	0/69	1.484328E-14 (Fisher's exact test)	4/8	0/12	0.093 (Fisher's exact test)
Host property (Disease)	Cardiovascular disease	CVD (Y/N)	110/113	0/69	1.601581E-17 (Fisher's exact test)	6/6	0/12	0.014 (Fisher's exact test)
Host property (Disease)	Diabetes	Diabetes (Y/N)	93/130	0/69	3.93252E-14 (Fisher's exact test)	4/8	0/12	0.093 (Fisher's exact test)
Host property (Disease)	Constipation	Constipation (Y/N)	63/160	n.d.	n.d.	2/10	n.d.	n.d.
Host property (Dietary)	Smoking	Smoking (Y/N)	54/167	n.d.	n.d.	1/11	0/12	1 (Fisher's exact test)
Host property (Dietary)	Alcohol	Alcohol (Y/N)	31/187	n.d.	n.d.	0/12	6/6	0.014 (Fisher's exact test)
Host property (Dietary)	Vegetable per day (g)	Vegetable	237.6 ± 196.57	214.77 ± 228.96	0.55002	n.d.	n.d.	n.d.
Host property (Dietary)	Red meat per day (g)	Red-meat	76.07 ± 101.82	63.18 ± 81.58	0.385729	n.d.	n.d.	n.d.
Host property (Dietary)	Fish per day (g)	Fish	12.01 ± 32.29	11.82 ± 39.31	0.976088	n.d.	n.d.	n.d.
Host property (Dietary)	Fruit per day (g)	Fruit	168.06 ± 184.66	201.48 ± 200.44	0.324877	n.d.	n.d.	n.d.
Host property (Dietary)	Egg per day (g)	Egg	44.77 ± 65.76	54.32 ± 51.73	0.314183	n.d.	n.d.	n.d.
Host property (Dietary)	Main foods (rice/wheat) per day (g)	Rice/wheat	446.56 ± 208.51	533.41 ± 253.48	0.0417101	n.d.	n.d.	n.d.
Host property (Dietary)	Milk per day (g)	Milk	96.43 ± 133.73	97.05 ± 124.39	0.977323	n.d.	n.d.	n.d.
Host property (Dietary)	Sweet foods per day (g)	Sweet-foods	3.99 ± 14.96	8.41 ± 29.17	0.33686	n.d.	n.d.	n.d.
Host property (Dietary)	Nuts per day (g)	Nuts	5.72 ± 16.57	7.89 ± 42.41	0.741688	n.d.	n.d.	n.d.
Clinical index (Renal function)	*Estimate Glomerular filtration rate (mL/min per 1.73 m^2)	eGFR	5.41 ± 2.76	104 ± 11.27	7.86376e-68	4.02 ± 1.57	90.26 ± 11.82	2.5541e-11
Clinical index (Renal function)	Uric acid (umol/L)	UA	428.97 ± 97.63	298.84 ± 79.72	5.26021e-21	480.41 ± 125.14	302.37 ± 43.49	0.00039875
Clinical index (Renal function)	Uric acid (umol/L)	UA-male	434.28 ± 101.88	335.53 ± 87.14	1.40097e-07	512.47 ± 167.52	322.74 ± 38.54	0.0384924
Clinical index (Renal function)	Uric acid (umol/L)	UA-female	418.97 ± 88.90	256.42 ± 40.74	1.77659e-23	448.35 ± 62.62	273.84 ± 35.06	0.000388148
Clinical index (Renal function)	Creatinine (umol/L)	CREA	902.46 ± 288.71	65.74 ± 10.4	1.33849e-107	1063.54 ± 280.73	73.81 ± 14.25	9.3399e-08
Clinical index (Renal function)	Creatinine (umol/L)	CREA-male	963.58 ± 303.91	71.99 ± 7.10	1.84633e-71	1137.95 ± 318.52	81.43 ± 13.04	0.000453708
Clinical index (Renal function)	Creatinine (umol/L)	CREA-female	786.75 ± 215.80	58.51 ± 8.83	1.58079e-42	989.13 ± 242.14	63.14 ± 7.72	0.000231314
Clinical index (Renal function)	Urea (mmol/L)	UREA	23.98 ± 7.12	5.04 ± 1.16	1.61466e-104	28.1 ± 6.43	5.36 ± 1.24	5.56319e-08
Clinical index (Blood lipids)	Triglycerides (mmol/L)	TG	2.01 ± 1.59	1.02 ± 0.38	8.03304e-15	2.63 ± 0.87	1.31 ± 0.57	0.000519802
Clinical index (Blood lipids)	Total cholesterol (mmol/L)	TCHO	4.11 ± 1.16	4.59 ± 0.61	1.978e-05	3.94 ± 0.89	5.4 ± 0.75	0.000416165
Clinical index (Blood lipids)	Low density lipoprotein (mmol/L)	LDL_C	2.22 ± 0.82	2.36 ± 0.47	0.104826	2.07 ± 0.65	1.58 ± 0.68	0.0915041
Clinical index (Blood lipids)	High density lipoprotein (mmol/L)	HDL_C	0.86 ± 0.32	1.02 ± 0.25	8.4027e-05	0.86 ± 0.18	3.18 ± 0.99	4.34299e-06
Clinical index (Blood pressure)	Systolic blood pressure (mm Hg)	SBP	142.04 ± 20.63	123.49 ± 13.5	2.59217e-15	144.92 ± 14.3	121.5 ± 10.88	0.000199031
Clinical index (Blood pressure)	Diastolic blood pressure (mm Hg)	DBP	80.07 ± 12.25	76.7 ± 9.5	0.0178596	83.33 ± 7.13	78.33 ± 9.51	0.160191
Clinical index (Blood pressure)	Mean arterial pressure (mm Hg)	MAP	100.72 ± 12.89	92.29 ± 9.67	3.52811e-08	103.86 ± 8	73.58 ± 12.14	7.41591e-07
Clinical index (Blood routine)	White blood cell (10^9/L)	WBC	6.66 ± 2.29	5.91 ± 1.3	0.000687249	8.44 ± 3.34	6.42 ± 2.05	0.0907745
Clinical index (Blood routine)	Red blood cells (10^12/L)	RBC	3.57 ± 0.56	4.86 ± 0.44	1.23147e-42	3.77 ± 0.54	5.86 ± 1.45	0.000361785
Clinical index (Blood routine)	Platelet (10^9/L)	PLT	176.57 ± 68.12	221.67 ± 54.97	1.09827e-07	243 ± 205.95	221.33 ± 41.03	0.727053
Clinical index (Blood routine)	Hematocrit (%)	HCT	33.28 ± 4.68	44.27 ± 3.96	3.2262e-40	0.35 ± 0.04	0.44 ± 0.04	6.67511e-06
Clinical index (Blood routine)	Mean corpuscular volume (fL)	MCV	97.29 ± 5.14	91.28 ± 4.45	0.130928	93.02 ± 9.36	89.92 ± 3.8	0.304951
Clinical index (Blood routine)	Mean corpuscular hemoglobin concentration (g/L)	MCHC	323.98 ± 13	332.12 ± 9.11	7.11945e-08	326.83 ± 7.71	338.33 ± 5.93	0.00053163
Clinical index (Blood routine)	Mean corpuscular hemoglobin (pg)	MCH	30.2 ± 1.94	30.31 ± 1.54	0.65099	30.38 ± 2.52	30.44 ± 1.42	0.937252
Clinical index (Blood routine)	Hemoglobin (g/L)	HGB	107.57 ± 15	147.14 ± 14.84	8.72524e-38	113.58 ± 12.07	147.58 ± 13.62	1.7636e-06
Clinical index (Blood routine)	Hemoglobin (g/L)	HGB-male	108.88 ± 15.83	158.59 ± 8.44	3.13432e-48	110.17 ± 12.27	156.86 ± 8.17	3.28801e-05
Clinical index (Blood routine)	Hemoglobin (g/L)	HGB-female	105.03 ± 12.97	133.91 ± 7.92	8.54609e-25	117 ± 11.92	134.6 ± 6.99	0.015449
Clinical index (Blood sugar)	Glucose (mmol/L)	GLU	7.2 ± 3.22	5.09 ± 0.44	2.0247e-16	9.01 ± 4.35	5.11 ± 0.28	0.0140571
Clinical index (Liver function)	γ-glutamyl transpeptadase (U/L)	γGT	32.81 ± 51.76	21.34 ± 16.17	0.00712371	22.83 ± 10.44	32.82 ± 36.59	0.410056
Clinical index (Liver function)	Alanine transaminase (U/L)	ALT	15.38 ± 8.12	22.24 ± 10.3	0.0297689	14.7 ± 7.25	22.09 ± 11.16	0.0728539
Clinical index (Liver function)	Glutamic oxaloacetic transaminase (U/L)	AST	14.91 ± 7.31	21.61 ± 5.22	0.00079522	15.3 ± 7.89	23.84 ± 5.88	0.00983501
Clinical index (Liver function)	Alkaline phosphatase (U/L)	ALP	103.35 ± 112.24	58.78 ± 15.18	7.46018e-08	78.84 ± 28.6	75.09 ± 22.81	0.775216
Clinical index (Liver function)	Total bilirubin (umol/L)	TBIL	8.52 ± 3.47	n.d.	n.d.	7.84 ± 2.29	n.d.	n.d.
Clinical index (Liver function)	Direct Bilirubin (umol/L)	DBIL	2.09 ± 1.6	n.d.	n.d.	1.31 ± 0.45	n.d.	n.d.
Clinical index (Liver function)	Total bile acids (U/L)	TBA	4.18 ± 3.53	n.d.	n.d.	5.03 ± 3.09	n.d.	n.d.
Clinical index (Liver function)	Creatine kinase isoenzymes MB (ng/mL)	MMB	8.06 ± 9.39	n.d.	n.d.	12.27 ± 4.35	n.d.	n.d.
Clinical index (Liver function)	Lactate dehydrogenase (U/L)	LDH	182.67 ± 45.53	n.d.	n.d.	188.83 ± 30.71	n.d.	n.d.
Clinical index (Liver function)	Cholinesterase (kU/L)	CHE	6.05 ± 1.37	n.d.	n.d.	6384.14 ± 1438.45	n.d.	n.d.
Clinical index (Dialysis)	Dialysis year	Dialysis year	4.37 ± 4.89	n.d.	n.d.	4.99 ± 1.51	n.d.	n.d.
Clinical index (Dialysis)	Dialysis period (month)	Dialysis period (month)	52.72 ± 58.66	n.d.	n.d.	59.83 ± 18.13	n.d.	n.d.
Clinical index (Dialysis)	Dialysis frequency (times per week)	Dialysis frequency (per week)	2.84 ± 0.4	n.d.	n.d.	3 ± 0	n.d.	n.d.
Clinical index (Dialysis)	Urea clearance index	Kt/V	1.38 ± 0.29	n.d.	n.d.	1.38 ± 0.35	n.d.	n.d.
Clinical index (Dialysis)	Semi permeable membrane type (sureflux/polyflux)	Membrane (sureflux/polyflux)	41/182	n.d.	n.d.	3/9	n.d.	n.d.
Clinical index (Dialysis)	Time passed since last dialysis (blood collection) (days)	Time interval - blood	2.9 ± 0.5	n.d.	n.d.	2.25 ± 0.45	n.d.	n.d.
Clinical index (Dialysis)	Time passed since last dialysis (faecal collection) (days)	Time interval - faecal	2.9 ± 0.5	n.d.	n.d.	2.25 ± 0.62	n.d.	n.d.
Clinical index (Ion and acid-base balance)	Phosphorum (mmol/L)	PHOS	1.89 ± 0.58	n.d.	n.d.	2.21 ± 0.47	n.d.	n.d.
Clinical index (Ion and acid-base balance)	Natrium (mmol/L)	Na	137.76 ± 3.37	n.d.	n.d.	136.3 ± 3.07	n.d.	n.d.
Clinical index (Ion and acid-base balance)	Magnesium (mmol/L)	Mg	1.12 ± 0.17	n.d.	n.d.	1.22 ± 0.16	n.d.	n.d.
Clinical index (Ion and acid-base balance)	Kalium (mmol/L)	K	5.27 ± 0.88	n.d.	n.d.	5.11 ± 0.86	n.d.	n.d.
Clinical index (Ion and acid-base balance)	Chlorine (mmol/L)	Cl	100.56 ± 4.03	n.d.	n.d.	98.28 ± 2.48	n.d.	n.d.
Clinical index (Ion and acid-base balance)	Corrected calcium (mmol/L)	CCa	2.25 ± 0.38	n.d.	n.d.	2.26 ± 0.13	n.d.	n.d.
Clinical index (Ion and acid-base balance)	Calcium (mmol/L)	Ca	2.26 ± 0.22	n.d.	n.d.	2.28 ± 0.15	n.d.	n.d.
Clinical index (Ion and acid-base balance)	Anion Gap (mmol/L)	AGAP	18.42 ± 3.88	n.d.	n.d.	20.69 ± 4.7	n.d.	n.d.
Clinical index (Iron-related indicators)	Unsaturated Iron-Binding Capacit (umol/L)	UIBC	30.83 ± 10.07	n.d.	n.d.	35.4 ± 7.45	n.d.	n.d.
Clinical index (Iron-related indicators)	Transferin saturation (%)	TSAT	28.32 ± 13.24	n.d.	n.d.	n.d.	n.d.	n.d.
Clinical index (Iron-related indicators)	Transferrin (g/L)	TRF	1.87 ± 0.51	n.d.	n.d.	n.d.	n.d.	n.d.
Clinical index (Iron-related indicators)	Total iron binding capacity (umol/L)	TIBC	45.32 ± 11.33	n.d.	n.d.	48.2 ± 6.49	n.d.	n.d.
Clinical index (Iron-related indicators)	Iron saturation (%)	IS	29.37 ± 13.05	n.d.	n.d.	25.83 ± 8.55	n.d.	n.d.
Clinical index (Iron-related indicators)	Serum iron (umol/L)	FE	12.17 ± 5.28	n.d.	n.d.	12.8 ± 3.07	n.d.	n.d.
Clinical index (Iron-related indicators)	Serum ferritsn (ng/mL)	FERR	368.44 ± 379.61	n.d.	n.d.	218.05 ± 143.04	n.d.	n.d.
Clinical index (Other indicators)	Total CO2 (mmol/L)	TCO2	21.54 ± 3.46	n.d.	n.d.	19.26 ± 3.34	n.d.	n.d.
Clinical index (Other indicators)	Parathyroid hormone (pg/mL)	PTH	297.59 ± 383.35	n.d.	n.d.	323.08 ± 210.42	n.d.	n.d.
Clinical index (Other indicators)	Hypersensitive C-reactive protein (mg/L)	hs_CRP	5.14 ± 6.83	n.d.	n.d.	n.d.	n.d.	n.d.
Clinical index (Other indicators)	C-reactive protein (mg/L)	CRP	7.63 ± 12.52	n.d.	n.d.	4.12 ± 3.93	n.d.	n.d.
Clinical index (Other indicators)	Lipopolysaccharide (LPS) binding protein	LBP	23997 ± 9722	15152 ± 4043	1.07621e-21	n.d.	n.d.	n.d.
Clinical index (Patient nutritional status)	Leptin (pg/ml)	Leptin	38738.21 ± 201104.56	5979.31 ± 7357.7	0.0314125	n.d.	n.d.	n.d.
Clinical index (Patient nutritional status)	Total Protein (g/L)	TP	67.66 ± 7.36	n.d.	n.d.	70.3 ± 5.67	n.d.	n.d.
Clinical index (Patient nutritional status)	Prealbumin (g/L)	PALB	0.33 ± 0.1	n.d.	n.d.	0.36 ± 0.21	n.d.	n.d.
Clinical index (Patient nutritional status)	Albumin/total Protein (%)	ALB/TP	0.58 ± 0.07	n.d.	n.d.	58.1 ± 4.01	n.d.	n.d.
Clinical index (Patient nutritional status)	Albumin (g/L)	ALB	39.1 ± 4.23	n.d.	n.d.	40.93 ± 3.29	n.d.	n.d.
Clinical index (Patient nutritional status)	Albumin/globulin (%)	A/G	1.37 ± 0.28	n.d.	n.d.	1.42 ± 0.21	n.d.	n.d.
* Note1: eGFR was calculated by the Chronic Kidney Disease Epidemiology Collaboration (CKD-EPI) equation as described in the Online methods section.
** Note2: the protopathy types include: 1. primary glomerular nephropathy, 2. diabetic nephropathy; 3. high blood pressure nephropathy, 4. polycystic kidney disease; 5. interstitial nephritis, 6 renal transplant loss, and 7 others.
n.d.: no data

## Sheet: ST2
Supplementary Table 2| Summary of multi-omics data production in this study.
Types of omic data	Types of data	No. of variables	No. of significant variables (q<0.05)*
Phenome	Host property	25	6
	Clinical index	69	23
	Drug usage	13	-
Metabolome	Serum (HPLC-MS)	180	134
	Serum (targeted uremic toxins)	5	5
	Faecal (GC-MS)	255	98
	Faecal (targeted bile acids)	16	2
Gut microbiome	Non-redundant gene	11.4 million	1.07 million
	Functional category (KEGG)	11867	730
	Taxa group (MetaPhlan2)	790	106
	Metagenomic species	900	457
HPLC-MS: high performance liquid chromatography with on-line mass spectrometry; GC-MS: gas chromatography-mass spectrometry; KEGG: Kyoto Encyclopedia of Genes and Genomes database (www.kegg.jp).
* Note: number of significantly different variables between ESRD patients and healthy controls.

## Sheet: ST3
Supplementary Table 3| Differential metabolites analysis of 180 annotated serum metabolites and its correlation with primary disease types.
Metabolite name	Avg. abun. control	Avg. abun. ESRD	P-value (ESRD vs. control)	q	Avg. abun. GN*	Avg. abun. DN*	Avg. abun. ON*	P-value (GN vs. control)	q	P-value (DN vs. control)	q	P-value (ON vs. control)	q	P-value (GN/DN/ON, k-w test)	q	P-value (GN vs. DN)	q	P-value (GN vs. ON)	q	P-value (DN vs. ON)	q
1,7-Dimethylxanthine	38603.9	51422.5	0.0067505	0.0368494	43719.4	58739.6	53870.1	0.178117	0.321998	0.00435522	0.022817	0.00991742	0.0324056	0.136753	0.497153	0.806592	0.810012	0.696984	1	0.544551	1
1-Amlnocydohexanecarboxylic acid	116508	195032	0.00391662	0.0223136	278598	169363	135252	2.48895e-05	8.75443e-05	0.0284435	0.11728	0.503388	0.520905	0.000230102	0.00924598	0.858188	0.810658	0.970828	1	0.995103	1
1-Hexadecanol	734672	581694	1.76199e-07	5.59008e-07	541609	619533	597413	9.28036e-08	2.49092e-07	0.00375475	0.0199131	1.30673e-05	3.5415e-05	0.0656955	0.325817	0.000839547	0.0168052	0.00304041	0.132217	0.574756	1
3-(1-Pyrazolyl)-alanine	10929.3	11170.2	0.533225	0.843214	12031.2	10610.1	10822.9	0.0035541	0.0154164	0.332615	0.743904	0.621265	0.534662	0.000621097	0.018435	0.265089	0.481508	0.0289011	0.472653	0.245688	0.709431
3-Indolepropionic acid	26213.7	14554.3	0.00249303	0.0145267	17627.8	11955.1	13997.1	0.00678625	0.0275516	0.0230847	0.0985591	0.0125847	0.0402858	0.817173	1	0.764432	0.803213	0.737108	1	0.533766	1
3-Methylhistidine	1448.92	12485.4	6.07853e-20	3.31651e-08	12800.9	12325.4	12717.8	5.50874e-14	2.87244e-08	4.75104e-14	5.01792e-08	8.16631e-14	2.57275e-08	0.990557	1	0.387729	0.594986	0.958695	1	0.3575	0.853849
3-Methylisoquinoline	42820.4	20187.2	1.41428e-33	3.31651e-08	21798.8	19241.5	19469.9	9.03573e-23	2.87244e-08	7.51622e-24	5.01792e-08	9.16834e-23	2.57275e-08	0.0284372	0.199973	0.911109	0.810658	0.35819	1	0.446655	0.945686
4-Hydroxyquinoline	99861.3	48444.5	2.69335e-33	3.31651e-08	52109	45992.4	46990.1	1.34294e-22	2.87244e-08	7.19766e-24	5.01792e-08	2.26813e-22	2.57275e-08	0.0222596	0.17308	0.00578598	0.0545238	0.535535	1	0.0260221	0.29157
Androsterone sulfate-1	172216	462576	9.70114e-07	3.26458e-06	543328	456002	378026	1.82605e-07	4.90028e-07	0.000159776	0.00090543	0.00604249	0.0204096	0.0833389	0.373772	0.0789407	0.244322	0.912935	1	0.104808	0.492209
Androsterone sulfate-2	55367.4	141700	1.33278e-07	4.21372e-07	171087	147658	104196	1.43517e-06	4.08637e-06	2.6362e-08	1.25782e-07	0.0131887	0.0420331	0.0203097	0.163942	0.00391388	0.0431715	0.100992	0.938006	0.231069	0.688929
Androsterone sulfate-3	466504	558430	0.646368	0.853849	660641	539498	465771	0.235422	0.382739	0.432023	0.873269	0.0941378	0.212918	0.0797728	0.364466	0.128051	0.31938	0.867462	1	0.132673	0.540377
Androsterone sulfate-4	65649.7	59791.2	0.0719274	0.266	59490.7	66770.5	52503.7	0.131902	0.265219	0.78683	1	0.00581608	0.0196852	0.0419963	0.251275	0.068234	0.225416	0.952582	1	0.0444716	0.356661
Arginine	67808	67421	0.600606	0.853726	68171.1	69208.5	64284.2	0.649689	0.623094	0.424574	0.864451	0.0694136	0.169988	0.096541	0.406816	0.0743772	0.236417	0.903812	1	0.144632	0.559827
Biliverdin	3718.49	3286	0.101293	0.342184	2320.56	3867.34	3768.48	0.00207478	0.00928762	0.829716	1	0.522183	0.524912	0.0097532	0.105845	0.277026	0.493671	0.136108	1	0.699792	1
Carnitine	546216	809168	8.90713e-05	0.000448476	904780	728330	810934	7.89106e-05	0.000308453	0.00327524	0.0175524	0.00105675	0.00368303	0.116007	0.452198	0.113971	0.299353	0.734217	1	0.13693	0.547368
Carnitine C10:0	123962	407522	6.46282e-16	3.31651e-08	332320	447869	457970	2.51285e-08	6.93304e-08	7.52359e-13	5.01792e-08	3.84838e-13	2.57275e-08	0.0209983	0.16721	0.516793	0.689296	0.677227	1	0.862322	1
Carnitine C10:1	62643.9	416262	3.76927e-27	3.31651e-08	348520	418135	495166	9.93628e-17	2.87244e-08	6.59208e-19	5.01792e-08	5.92709e-21	2.57275e-08	0.0173313	0.149225	0.206482	0.417819	0.561095	1	0.600044	1
Carnitine C10:2 *1	16283.3	270377	7.71179e-34	3.31651e-08	225647	259880	329138	3.04227e-24	2.87244e-08	2.36365e-22	5.01792e-08	2.98238e-23	2.57275e-08	0.00159691	0.0344824	0.330342	0.544973	0.301178	1	0.0241682	0.283476
Carnitine C10:2 *2	23557.3	417336	1.3649e-34	3.31651e-08	417234	376136	465528	6.06579e-25	2.87244e-08	9.37335e-23	5.01792e-08	1.08756e-23	2.57275e-08	0.0974819	0.409095	0.0076838	0.0645176	0.961752	1	0.032011	0.315339
Carnitine C12:0	26040.5	104828	9.27099e-19	3.31651e-08	92854.3	109516	115968	7.23553e-12	2.87244e-08	5.71189e-14	5.01792e-08	4.69501e-14	2.57275e-08	0.323369	0.814963	0.665123	0.769132	0.696984	1	0.271472	0.744787
Carnitine C12:1	18560.8	85007.5	1.55056e-17	3.31651e-08	65068.8	82732.1	110683	4.20084e-11	2.87244e-08	3.66156e-13	5.01792e-08	7.10475e-13	2.57275e-08	0.229125	0.669706	0.000939385	0.018036	0.725565	1	0.00951091	0.195949
Carnitine C14:0	10303.9	31077.2	5.57188e-21	3.31651e-08	27568.1	30338.3	36239.3	3.72761e-13	2.87244e-08	7.84574e-15	5.01792e-08	1.54368e-16	2.57275e-08	0.0594451	0.307503	0.576707	0.725141	0.486236	1	0.176162	0.608807
Carnitine C14:1	24502.6	132042	3.3043e-19	3.31651e-08	110266	131971	158823	4.23955e-12	2.87244e-08	5.52891e-14	5.01792e-08	1.28909e-14	2.57275e-08	0.299783	0.781063	0.000150711	0.0053972	0.958695	1	0.000970167	0.0630277
Carnitine C14:2	24680.4	137678	4.83421e-21	3.31651e-08	114416	139060	165035	3.02508e-14	2.87244e-08	2.93711e-15	5.01792e-08	8.41944e-15	2.57275e-08	0.366043	0.872175	0.579384	0.72663	0.708368	1	0.846316	1
Carnitine C16:0	46209.8	147344	6.39654e-29	3.31651e-08	158599	126522	158651	3.43385e-19	2.87244e-08	2.07308e-19	5.01792e-08	1.46723e-21	2.57275e-08	0.0190066	0.157624	0.00823806	0.0672297	0.135103	1	0.289657	0.769069
Carnitine C16:1	25165.7	59423.2	4.77042e-17	3.31651e-08	54093.4	56004.9	69833.1	9.12583e-11	2.87244e-08	4.17648e-12	5.01792e-08	3.19506e-14	2.57275e-08	0.0371145	0.233779	0.889402	0.810658	0.248976	1	0.324414	0.813768
Carnitine C16:2	6845.6	19336.1	1.54379e-13	3.31651e-08	16169.2	19447.1	23040.3	8.30896e-08	2.23232e-07	9.45651e-11	5.01792e-08	9.62053e-11	2.57275e-08	0.209463	0.635905	0.182267	0.389327	0.0374111	0.546676	0.509901	0.992197
Carnitine C18:0	38873.8	113319	1.2654e-23	3.31651e-08	121334	101312	118878	4.03614e-16	2.87244e-08	1.58329e-14	5.01792e-08	4.15856e-19	2.57275e-08	0.13703	0.497733	0.368654	0.578939	0.922069	1	0.38813	0.888349
Carnitine C18:1	138052	441454	1.76337e-26	3.31651e-08	454697	387653	488424	9.35118e-18	2.87244e-08	1.06744e-17	5.01792e-08	8.40868e-20	2.57275e-08	0.0428678	0.254303	0.917323	0.810658	0.132121	1	0.133728	0.542117
Carnitine C2:0	8002.19	100472	2.91338e-31	3.31651e-08	121340	78775	102800	4.19979e-22	2.87244e-08	6.87924e-21	5.01792e-08	4.92599e-22	2.57275e-08	0.476722	0.993601	0.434519	0.63199	0.772085	1	0.600044	1
Carnitine C3:0	6881.67	100642	1.82736e-26	3.31651e-08	124843	75828.7	102694	1.66783e-18	2.87244e-08	2.76535e-16	5.01792e-08	4.36509e-20	2.57275e-08	0.0309732	0.210267	0.407394	0.610941	0.000949551	0.0693335	0.0231611	0.278903
Carnitine C4	48900	770354	1.59618e-33	3.31651e-08	935093	608512	773277	6.35159e-24	2.87244e-08	1.76272e-22	5.01792e-08	7.45388e-23	2.57275e-08	0.0152361	0.138216	0.151101	0.350328	0.691317	1	0.0513657	0.376329
Carnitine C4:1	4828.48	15798.4	1.35834e-33	3.31651e-08	15428	15885.4	16133.9	2.41643e-23	2.87244e-08	1.49008e-22	5.01792e-08	1.80321e-23	2.57275e-08	0.889639	1	0.10361	0.283948	0.605857	1	0.37262	0.871221
Carnitine C4-OH	10194.2	4383.29	1.56062e-10	3.31651e-08	4535.72	4117.44	4510.45	1.47028e-07	3.94164e-07	2.01687e-07	9.1728e-07	1.44418e-07	3.3832e-07	0.809708	1	0.104444	0.285211	0.281877	1	0.693756	1
Carnitine C5	12956.4	199519	5.195e-35	3.31651e-08	231827	173169	195671	1.04109e-24	2.87244e-08	1.85856e-23	5.01792e-08	4.09783e-24	2.57275e-08	0.133257	0.489788	0.0724885	0.233081	0.931213	1	0.0825234	0.449241
Carnitine C5:1	2855.87	46275.7	1.14494e-35	3.31651e-08	54085.9	38468.3	46706.7	4.72299e-25	2.87244e-08	4.09232e-24	5.01792e-08	1.89691e-24	2.57275e-08	0.0134316	0.128208	0.0202899	0.113821	0.722689	1	0.0110828	0.208687
Carnitine C6:0	12684.7	80211.9	1.271e-22	3.31651e-08	76353.3	75329.8	91671.3	2.67131e-15	2.87244e-08	8.79485e-16	5.01792e-08	2.03975e-16	2.57275e-08	0.482565	0.998804	0.326465	0.541403	0.68285	1	0.150333	0.568906
Carnitine C8:0	48799.2	250179	6.02987e-24	3.31651e-08	238982	249421	270085	1.53793e-16	2.87244e-08	5.58846e-16	5.01792e-08	1.4858e-17	2.57275e-08	0.617096	1	0.207893	0.419436	0.702667	1	0.152661	0.572581
Carnitine C8:1	29718	506711	1.33159e-32	3.31651e-08	444238	480496	607415	3.07521e-23	2.87244e-08	1.95099e-21	5.01792e-08	1.22419e-22	2.57275e-08	0.00356794	0.0573349	0.0218179	0.118678	0.0132715	0.30375	0.897726	1
chenodeoxycholic acid	211844	66788.3	4.01681e-19	3.31651e-08	52960.6	77361.7	72310.9	1.64434e-16	2.87244e-08	1.52351e-10	5.01792e-08	6.48332e-13	2.57275e-08	0.822964	1	0.48197	0.666213	0.705515	1	0.370436	0.868752
Cholic acid	73101.3	18551.1	2.30029e-12	3.31651e-08	11020.6	19562.9	24791.5	3.10306e-12	2.87244e-08	1.3011e-07	5.93964e-07	5.46051e-07	1.28591e-06	0.781854	1	0.914215	0.810658	0.182482	1	0.349036	0.843853
Choline	85212.8	128357	6.12444e-21	3.31651e-08	129870	128238	125344	3.09705e-16	2.87244e-08	4.12857e-15	5.01792e-08	3.38822e-12	2.57275e-08	0.459027	0.977051	0.213606	0.425939	0.00160255	0.0925519	0.0915527	0.467283
Cinnamoylglycine	22569.6	77065.2	6.21977e-32	3.31651e-08	88076.4	68247.1	75029.9	2.28177e-24	2.87244e-08	2.61612e-19	5.01792e-08	2.6718e-22	2.57275e-08	3.6705e-05	0.00251188	0.0005006	0.0120778	0.00185044	0.100243	0.827192	1
Creatinine	3317.69	35256.5	1.12135e-35	3.31651e-08	37989.7	30795.7	36796.8	4.72299e-25	2.87244e-08	3.91789e-24	5.01792e-08	1.89691e-24	2.57275e-08	0.000417224	0.0140276	0.016427	0.100734	0.0191743	0.374466	0.900956	1
DCA	126736	50212	2.56772e-18	3.31651e-08	48352	57566.1	44909	6.92968e-14	2.87244e-08	5.69762e-10	5.01792e-08	7.88334e-15	2.57275e-08	0.0873139	0.383944	0.155612	0.356158	0.638384	1	0.34694	0.841349
D-Citramalic Acid	3864.91	14996.6	6.65192e-35	3.31651e-08	14295.8	15159.4	15793.1	2.58139e-24	2.87244e-08	1.78046e-23	5.01792e-08	2.78999e-24	2.57275e-08	0.220619	0.655247	0.0256912	0.130327	0.263434	1	0.227906	0.68445
Dehydroepiandrosterone Sulfate	1.18024e+06	722980	2.70685e-10	3.31651e-08	778058	704020	670845	7.96976e-07	2.21106e-06	2.42108e-07	1.10055e-06	2.07549e-08	5.13456e-08	0.419477	0.935962	0.215051	0.427573	0.00612318	0.195941	0.129549	0.535193
Delta-valerolactam	172331	152535	0.67038	0.853849	201599	121796	134394	0.0238856	0.077797	0.326279	0.734784	0.759268	0.534662	0.00107117	0.0265668	0.188772	0.397123	0.2203	1	0.0117464	0.213676
Erucamide	1.95634e+07	1.93257e+07	0.622719	0.853849	1.84062e+07	1.84718e+07	2.10439e+07	0.218501	0.365744	0.50238	0.94951	0.484956	0.516317	0.124223	0.470374	0.0844323	0.253568	0.922069	1	0.135856	0.545612
Farnesylacetone	494752	357306	4.2378e-10	3.31651e-08	328026	372149	379499	1.39042e-09	2.87244e-08	2.03646e-05	0.000106078	1.36462e-06	3.28965e-06	0.0660232	0.326756	0.705423	0.785302	0.0529331	0.66328	0.127497	0.531764
FFA C10:0	23446	17949	7.60139e-09	3.31651e-08	18423.2	18236.8	17632.3	1.34989e-05	4.49635e-05	2.6515e-07	1.20525e-06	6.26013e-06	1.62036e-05	0.661545	1	0.911109	0.810658	0.202095	1	0.20226	0.647556
FFA C11:0	1892.9	1715.23	0.0217866	0.102447	1786.5	1659.8	1703.24	0.413158	0.52455	0.00423995	0.0222638	0.0446959	0.120288	0.368512	0.875319	0.151101	0.350328	0.148625	1	0.975586	1
FFA C12:0	120138	88147.8	2.57698e-08	8.26238e-08	83873.8	85599	96614.5	4.5626e-06	1.39424e-05	1.44104e-05	7.38085e-05	5.3452e-06	1.37111e-05	0.743828	1	0.169759	0.37402	0.215998	1	0.904188	1
FFA C14:0	506988	464754	8.89707e-09	3.31651e-08	460624	450211	493192	2.92543e-07	7.89476e-07	2.91586e-05	0.000154539	4.38063e-06	1.11154e-05	0.255081	0.712374	0.024671	0.127343	0.332699	1	0.150333	0.568906
FFA C14:1-1	29497.2	18967.1	4.39369e-11	3.31651e-08	17306.5	18119.7	22236.7	3.30693e-08	9.04479e-08	1.84005e-07	8.37272e-07	1.31879e-07	3.09227e-07	0.705724	1	0.301986	0.518291	0.417136	1	0.814499	1
FFA C14:1-2	28677.9	8172.81	3.01804e-23	3.31651e-08	7207.73	9187.32	8409.85	2.55292e-18	2.87244e-08	2.60178e-14	5.01792e-08	1.43895e-15	2.57275e-08	0.217381	0.649678	0.000562463	0.0130212	0.310235	1	0.0361437	0.33006
FFA C15:0	155084	147899	5.57509e-08	1.76297e-07	153365	142708	149134	1.40005e-05	4.67817e-05	7.67823e-05	0.000424694	1.25481e-06	3.01651e-06	0.417043	0.933256	0.250268	0.466042	0.846381	1	0.353252	0.848855
FFA C16:0	1.20065e+07	1.0083e+07	3.2127e-10	3.31651e-08	9.99706e+06	1.03056e+07	1.0117e+07	1.11091e-09	2.87244e-08	0.000115127	0.000646127	1.44418e-07	3.3832e-07	0.149873	0.52412	0.250268	0.466042	0.946473	1	0.237488	0.697972
FFA C16:1	1.17815e+06	809882	5.93555e-11	3.31651e-08	743318	757862	956915	1.96637e-09	2.87244e-08	2.89389e-06	1.38046e-05	2.11812e-07	4.95184e-07	0.3519	0.853811	0.260083	0.476329	0.816458	1	0.218602	0.671189
FFA C16:2	29017.7	19099.4	5.49306e-20	3.31651e-08	19433.3	15853.8	22426.8	4.182e-15	2.87244e-08	2.58606e-13	5.01792e-08	4.62882e-13	2.57275e-08	0.322666	0.813975	0.656607	0.76538	0.780905	1	0.444222	0.943556
FFA C17:0	331471	275902	1.01343e-09	3.31651e-08	274686	281277	274701	2.1387e-08	5.93522e-08	0.000101873	0.00056939	7.96413e-08	1.88244e-07	0.156794	0.53795	0.0513183	0.192474	0.660467	1	0.053854	0.383011
FFA C17:1	94074.4	68874	9.97287e-11	3.31651e-08	69544.3	67309.3	71524.3	1.96637e-09	2.87244e-08	1.41338e-05	7.23237e-05	9.79881e-08	2.30708e-07	0.170519	0.564653	0.178445	0.384695	0.622028	1	0.130584	0.536915
FFA C18:0	8.76681e+06	7.67927e+06	1.62999e-09	3.31651e-08	7.51422e+06	7.9956e+06	7.57969e+06	1.25862e-09	2.87244e-08	0.000453085	0.00260411	2.89295e-07	6.7664e-07	0.0208296	0.166414	0.734732	0.795188	0.638384	1	0.933335	1
FFA C18:1	1.61125e+07	1.24315e+07	1.04064e-08	3.44513e-08	1.19392e+07	1.30591e+07	1.26129e+07	3.96634e-08	1.07951e-07	0.000901216	0.00513766	5.70209e-07	1.34381e-06	0.181389	0.585171	0.3284	0.543187	0.96481	1	0.308644	0.793785
FFA C18:2	1.24365e+07	9.13873e+06	3.28643e-13	3.31651e-08	9.08524e+06	8.96004e+06	9.58091e+06	1.57434e-11	2.87244e-08	7.23198e-07	3.31801e-06	1.90346e-09	2.57275e-08	0.254044	0.710709	0.877035	0.810658	0.0747476	0.800471	0.0485076	0.368394
FFA C18:3	851217	614818	2.05454e-14	3.31651e-08	670743	534643	652482	1.09836e-10	2.87244e-08	1.89065e-09	5.01792e-08	6.3718e-10	2.57275e-08	0.465999	0.983712	0.673683	0.772791	0.919023	1	0.782986	1
FFA C18:4	8371.25	6992.04	3.80393e-15	3.31651e-08	8253.79	5346.43	7500.76	8.55597e-12	2.87244e-08	9.19342e-11	5.01792e-08	4.51622e-09	2.57275e-08	0.987711	1	0.392048	0.598541	0.705515	1	0.666842	1
FFA C19:0	48674.4	41285.8	1.49121e-08	4.8647e-08	40832.3	42494.1	40709.9	5.61133e-07	1.53805e-06	0.000109259	0.000612133	6.77555e-07	1.60214e-06	0.202587	0.623761	0.289325	0.505938	0.446343	1	0.926849	1
FFA C19:1	49973.4	38694.4	3.17537e-08	1.01304e-07	38172.8	40177.3	38502.2	4.55536e-07	1.2412e-06	0.000322534	0.00185111	1.78903e-06	4.35548e-06	0.242339	0.691694	0.650954	0.762829	0.247405	1	0.48151	0.973495
FFA C20:0	237361	259851	0.566435	0.850479	259204	258835	261643	0.142478	0.278958	0.43703	0.879118	0.436823	0.501214	0.281956	0.754376	0.275299	0.491927	0.643876	1	0.107456	0.497003
FFA C20:1	340044	319694	3.6647e-05	0.000168391	315337	328314	320091	2.57874e-05	9.09962e-05	0.10153	0.321737	3.08379e-05	8.8702e-05	0.178665	0.580078	0.547646	0.708358	0.548241	1	0.295269	0.776445
FFA C20:2	353775	269668	7.3335e-10	3.31651e-08	258163	279822	276655	7.62863e-09	2.87244e-08	0.000327853	0.00188191	2.17779e-08	5.37564e-08	0.0325484	0.216478	0.506708	0.682784	0.772085	1	0.693756	1
FFA C20:3	325479	229416	4.57254e-17	3.31651e-08	233506	223061	235403	6.91707e-13	2.87244e-08	1.0005e-10	5.01792e-08	6.47089e-12	2.57275e-08	0.125881	0.473981	0.0182693	0.107132	0.970927	1	0.0291836	0.304525
FFA C20:4	1.13169e+06	741306	2.55757e-19	3.31651e-08	783957	716977	723032	3.78557e-12	2.87244e-08	3.17005e-14	5.01792e-08	4.8475e-14	2.57275e-08	0.824339	1	0.278761	0.495418	0.961752	1	0.234263	0.693436
FFA C20:5-1	54460.7	29796.3	1.92188e-17	3.31651e-08	33333	27325.2	29054.2	1.2383e-12	2.87244e-08	2.61021e-11	5.01792e-08	2.23507e-12	2.57275e-08	0.59545	1	0.0438626	0.176333	0.297605	1	0.282287	0.759297
FFA C20:5-2	19177.8	14525.6	4.54346e-11	3.31651e-08	13720.2	14707.4	15509.4	2.81403e-10	2.87244e-08	1.998e-05	0.000103978	6.93083e-08	1.64327e-07	0.120483	0.462165	0.132025	0.324866	0.995409	1	0.157399	0.580009
FFA C22:0	98678.9	132388	0.687393	0.853849	131492	128183	135181	0.693457	0.628045	0.161815	0.453976	0.938519	0.534662	0.405583	0.920256	0.653778	0.764109	0.96481	1	0.733317	1
FFA C22:1	46575	57987	1.82628e-07	5.79736e-07	86021.7	31679.5	55354	5.02006e-06	1.54466e-05	0.000165325	0.000937703	8.89772e-06	2.35245e-05	0.71194	1	0.00209121	0.0295649	0.0772844	0.814909	0.12852	0.533476
FFA C22:2	18499.7	13789.8	4.10141e-12	3.31651e-08	13155.9	14193.8	14275.2	2.01598e-11	2.87244e-08	2.65464e-05	0.000140064	2.22014e-09	2.57275e-08	0.0789607	0.362321	0.631329	0.753611	0.740003	1	0.399446	0.90037
FFA C22:5	196090	104125	9.36112e-21	3.31651e-08	114272	93912	105136	2.59136e-14	2.87244e-08	5.23424e-15	5.01792e-08	8.06513e-14	2.57275e-08	0.239154	0.686446	0.0387978	0.16461	0.558513	1	0.130582	0.536913
FFA C22:6	768858	378007	1.0483e-21	3.31651e-08	388915	361204	386523	2.50499e-15	2.87244e-08	5.99343e-16	5.01792e-08	7.5697e-14	2.57275e-08	0.547463	1	0.358313	0.570002	0.068702	0.764912	0.678753	1
FFA C24:0	152688	175614	0.982128	0.853849	168028	177075	178562	0.641073	0.621526	0.386133	0.816704	0.66004	0.534662	0.516219	1	0.749535	0.799468	0.632912	1	0.808171	1
FFA C24:1	99521.7	77097.9	9.7024e-12	3.31651e-08	76890.4	77239.3	77695.4	5.91637e-10	2.87244e-08	4.97106e-07	2.26821e-06	6.31544e-08	1.50077e-07	0.43254	0.950137	0.85854	0.810658	0.763294	1	0.888047	1
FFA C9:0	20507	18048.6	0.267308	0.639313	18427.7	17589	18270.3	0.852382	0.628451	0.225663	0.574224	0.247283	0.391657	0.562965	1	0.0858525	0.255915	0.677227	1	0.262679	0.732847
FFAD C20:0	179592	177032	0.715686	0.853849	161740	176670	191575	0.127846	0.259816	0.937202	1	0.549646	0.529546	0.108901	0.436037	0.496736	0.676207	0.550801	1	0.223219	0.677787
FFAD C22:0	332851	313136	0.428159	0.794327	275205	309937	353978	0.0208336	0.0699029	0.64403	1	0.429483	0.498507	0.00453225	0.0664613	0.0750156	0.237536	0.00577495	0.189574	0.271472	0.744787
GCA	39882.4	95701.1	9.7327e-06	3.90595e-05	70629.8	91082.6	128825	0.000323726	0.00141017	0.000100101	0.000559144	0.000614668	0.00211475	0.840697	1	0.985936	0.810658	0.522978	1	0.628718	1
GCDCA-3-glucu	12863	19282.6	0.166641	0.481253	12844.1	23589	21727.1	0.672894	0.626371	0.00231046	0.0126723	0.527619	0.525945	0.00310799	0.0526163	0.0451076	0.179114	0.172617	1	0.471403	0.965964
GCDCS	8962.42	33599.7	2.97168e-08	9.49461e-08	21027.2	34774.7	46052.7	0.000360372	0.00157934	4.34972e-07	1.98195e-06	1.03795e-06	2.48067e-06	0.103272	0.422913	0.131023	0.323489	0.646629	1	0.185469	0.62278
GDCS	10499.4	24747.3	6.33716e-05	0.000308303	18133.9	30919	25302.8	0.0256843	0.0823	3.51336e-05	0.000187853	0.000981382	0.00341621	0.0761395	0.354797	0.104444	0.285211	0.766221	1	0.240745	0.702535
Glutamic acid	27928.4	28614.4	0.813076	0.853849	27040.6	31307.3	27713.9	0.28985	0.432828	0.0281368	0.116232	0.663062	0.534662	0.00272233	0.0484277	0.00621595	0.0568976	0.014152	0.315052	0.655013	1
Glutamine	33346.3	31705.1	0.141734	0.432395	33483.6	28666.5	32945.2	0.714248	0.628451	0.000213096	0.00121564	0.813771	0.534662	9.78898e-06	0.00102121	0.0627903	0.215281	0.131139	1	0.702816	1
Glycochenodeoxycholate	307180	427420	0.0553991	0.217888	373030	443045	476559	0.286218	0.429687	0.0241336	0.102295	0.134997	0.272933	0.433164	0.9508	0.00448412	0.0468343	0.0164098	0.342728	0.745639	1
Glycodeoxycholate	83961	124751	0.237088	0.597684	112419	156981	104374	0.902858	0.628451	0.0316719	0.128159	0.506051	0.521514	0.100173	0.415559	0.0887507	0.260652	0.998469	1	0.133728	0.542117
Glycoursodeoxycholic acid	56755.9	84948.1	0.797664	0.853849	90653.7	66024.9	99051.7	0.284414	0.428116	0.121611	0.368305	0.286763	0.422132	0.0249841	0.185292	0.809626	0.810238	0.256938	1	0.363932	0.861317
GUDCS	6110.76	18691.7	0.000849484	0.0049848	11851.2	17031.3	27504.3	0.0254204	0.0816457	0.00671455	0.0337618	0.00129722	0.00453186	0.502285	1	0.0369867	0.160243	0.382782	1	0.420308	0.921401
Hexadecatrienoic acid	10781.2	5157.15	1.17549e-18	3.31651e-08	4690.65	5488.34	5394.91	5.25467e-16	2.87244e-08	1.49946e-11	5.01792e-08	1.99654e-11	2.57275e-08	0.0810496	0.367818	0.49922	0.677858	0.493471	1	0.190947	0.630922
Hippuric acid	28870.9	994036	5.75891e-35	3.31651e-08	977202	893288	1.12576e+06	9.19292e-25	2.87244e-08	2.02508e-23	5.01792e-08	5.52059e-24	2.57275e-08	0.0940769	0.400804	0.0718677	0.231975	0.666035	1	0.143511	0.558029
Homocysteine	9568	76945	1.12135e-35	3.31651e-08	81477.7	72089.2	77084.5	4.72299e-25	2.87244e-08	3.91789e-24	5.01792e-08	1.89691e-24	2.57275e-08	0.0677978	0.331804	0.628546	0.75226	0.370359	1	0.669812	1
Homoserine	3549.71	2934.6	8.31358e-05	0.000415734	3250.88	2500.98	3048.98	0.0955718	0.213749	2.53376e-07	1.15173e-06	0.00492077	0.0167923	0.000648715	0.018988	0.568709	0.720635	0.0406854	0.573	0.0072103	0.17423
Hydrocortisone	55059.3	49175.4	0.0225607	0.105488	48698.7	51411.2	48073.3	0.0506026	0.136702	0.214451	0.554291	0.0255723	0.0754265	0.644534	1	0.436826	0.633729	0.961752	1	0.555443	1
Hypoxanthine	28912.3	24023.8	0.0493548	0.199119	24485.6	22547.9	25233.4	0.164349	0.30592	0.0220755	0.0949297	0.302121	0.432751	0.266703	0.730801	0.560766	0.716074	0.630183	1	0.383659	0.883487
Indolelactic acid	22962.2	76968.3	9.0311e-32	3.31651e-08	87942.1	68105.5	75034.5	2.01665e-24	2.87244e-08	4.66699e-19	5.01792e-08	3.55632e-22	2.57275e-08	3.22445e-05	0.00229439	0.0173267	0.103897	9.33029e-05	0.020319	0.0457843	0.36055
Indoxyl sulfate	62176.7	1.90292e+06	5.41366e-35	3.31651e-08	1.89843e+06	1.78978e+06	2.02993e+06	5.81826e-25	2.87244e-08	8.25708e-23	5.01792e-08	1.89691e-24	2.57275e-08	0.518014	1	0.457899	0.649259	0.879551	1	0.531087	1
Kynurenine	9865.94	30615.4	1.12135e-35	3.31651e-08	32270.9	27104.5	32543.8	4.72299e-25	2.87244e-08	3.91789e-24	5.01792e-08	1.89691e-24	2.57275e-08	0.000232389	0.00931083	0.0225029	0.120804	0.0214525	0.399145	0.855913	1
Lactic acid	45206.7	49124.4	0.0318423	0.140227	48034.8	52271.7	47329.6	0.127846	0.259816	0.00365403	0.0194205	0.364504	0.469609	0.111612	0.442254	0.989061	0.810658	0.840377	1	0.969078	1
Leucine/Isoleucine	253826	229767	0.00159437	0.00939068	235109	242237	212007	0.0238856	0.077797	0.172278	0.474878	4.12294e-05	0.000121083	0.00737647	0.089438	0.183554	0.390879	0.213164	1	0.904188	1
LPC 14:0 sn-1	655356	626138	0.454736	0.810404	619987	649319	623489	0.618334	0.616534	0.896653	1	0.349272	0.461485	0.751692	1	0.935997	0.810658	0.79863	1	0.733317	1
LPC 14:0 sn-2	73201.4	74020.7	0.586826	0.852943	74120.7	77966	71606.8	0.57123	0.602531	0.332615	0.743904	0.935203	0.534662	0.605138	1	0.539848	0.703662	0.368313	1	0.811334	1
LPC 15:0 sn-1	352840	382214	0.233163	0.591938	383305	383218	382115	0.337857	0.471881	0.269099	0.647359	0.344996	0.459106	0.985122	1	0.0101217	0.0759055	0.115292	1	0.379219	0.878598
LPC 15:0 sn-2	74490.3	78390.8	0.651141	0.853849	78119.6	81165.1	76756	0.678743	0.626969	0.494274	0.941389	0.88892	0.534662	0.905771	1	0.0718677	0.231975	0.376539	1	0.434564	0.934872
LPC 16:0 sn-1	5.98824e+07	6.50123e+07	8.21379e-06	3.24371e-05	6.45056e+07	6.60019e+07	6.47419e+07	0.000432358	0.00191252	3.14224e-05	0.00016713	0.000653496	0.00225265	0.390558	0.902565	0.156755	0.357625	0.140186	1	0.923608	1
LPC 16:0 sn-2	8.88505e+06	1.03351e+07	6.41489e-11	3.31651e-08	1.01867e+07	1.05904e+07	1.02979e+07	6.08411e-08	1.64124e-07	1.86966e-08	9.06316e-08	1.65412e-07	3.87092e-07	0.309388	0.795061	0.141315	0.337439	0.568877	1	0.0419414	0.348951
LPC 16:1 sn-1	1.8089e+06	2.00261e+06	0.0297853	0.132778	1.93031e+06	2.10222e+06	2.01744e+06	0.101276	0.222332	0.0394852	0.153443	0.053303	0.138502	0.848381	1	0.648135	0.761539	0.822423	1	0.761133	1
LPC 16:1 sn-2	228717	256116	0.0423333	0.176384	234571	277255	262891	0.373262	0.497904	0.0398949	0.154732	0.0198835	0.0606117	0.245255	0.696472	0.0173267	0.103897	0.41056	1	0.269697	0.742387
LPC 17:0	1.02014e+06	1.10409e+06	0.104798	0.350615	1.0935e+06	1.14043e+06	1.07457e+06	0.151398	0.290178	0.144671	0.418546	0.326167	0.448106	0.821556	1	0.256782	0.47289	0.654918	1	0.328437	0.818781
LPC 18:0 sn-1	3.8603e+07	4.017e+07	0.125419	0.397769	4.03597e+07	3.94922e+07	4.06855e+07	0.142478	0.278958	0.462565	0.907946	0.122415	0.255692	0.589488	1	0.346148	0.559271	0.491053	1	0.859116	1
LPC 18:0 sn-2	7.22315e+06	7.6181e+06	0.0962104	0.329729	7.69458e+06	7.46503e+06	7.70931e+06	0.0939902	0.211331	0.341186	0.756069	0.131761	0.268595	0.722382	1	0.818747	0.810658	0.992348	1	0.733317	1
LPC 18:1 sn-1	3.26425e+07	3.87053e+07	3.5231e-08	1.12157e-07	3.78498e+07	3.955e+07	3.9057e+07	2.2371e-05	7.79272e-05	4.65039e-07	2.12034e-06	7.46836e-06	1.95342e-05	0.289878	0.766349	0.552876	0.711461	0.561095	1	0.255788	0.723403
LPC 18:1 sn-2	5.34456e+06	6.3657e+06	3.36069e-08	1.07088e-07	6.15352e+06	6.522e+06	6.48599e+06	3.35729e-05	0.000121372	1.21719e-06	5.64834e-06	1.51493e-06	3.66535e-06	0.264271	0.726978	8.88573e-05	0.00371767	0.131139	1	0.0376187	0.335045
LPC 18:2 sn-1	6.48214e+07	6.39736e+07	0.435938	0.799295	6.36854e+07	6.51982e+07	6.33098e+07	0.448257	0.545701	0.728527	1	0.19119	0.339224	0.346936	0.847224	0.714167	0.788432	0.931212	1	0.693756	1
LPC 18:2 sn-2	2.04071e+07	2.02245e+07	0.728113	0.853849	1.99331e+07	2.12663e+07	1.96661e+07	0.638212	0.620965	0.513296	0.960163	0.410263	0.490895	0.286589	0.7614	5.78323e-06	0.000488228	0.0093451	0.248887	0.0625013	0.40484
LPC 18:3 sn-1	721396	594706	0.00638819	0.03505	573473	627883	597167	0.0189252	0.0647859	0.116569	0.356878	0.0118643	0.0381842	0.621431	1	0.656607	0.76538	0.915978	1	0.600044	1
LPC 18:3 sn-2	119829	100012	0.00500347	0.0280215	102047	101739	98143.7	0.0443404	0.124148	0.058926	0.211358	0.00589069	0.0199242	0.410581	0.925979	0.429927	0.628504	0.0272547	0.457218	0.12248	0.523286
LPC 20:0 sn-1	147424	166292	0.0166073	0.0814064	151292	162720	183651	0.505229	0.575458	0.0954565	0.307055	0.000487382	0.00166309	0.00790493	0.093259	0.228381	0.442431	0.102597	0.945656	0.628718	1
LPC 20:0 sn-2	25039.1	27720.7	0.0493548	0.199119	25245.7	27250.3	30518.9	0.979248	0.628451	0.12264	0.370616	0.00126002	0.00440082	0.0217313	0.170639	0.0598067	0.209552	0.224663	1	0.312539	0.798767
LPC 20:1	433756	488788	0.00529434	0.029519	484914	474270	504861	0.072691	0.176941	0.0441938	0.168062	0.00270164	0.00939979	0.336241	0.832784	0.873947	0.810658	0.937314	1	0.910655	1
LPC 20:2 sn-1	1.59406e+06	1.61011e+06	0.962281	0.853849	1.55478e+06	1.64996e+06	1.6344e+06	0.429331	0.534561	0.546768	0.990742	0.696664	0.534662	0.312964	0.800206	0.232952	0.447441	0.0392013	0.561199	0.00251469	0.105818
LPC 20:2 sn-2	264635	271685	0.608712	0.853849	264558	277401	274783	0.896523	0.628451	0.352096	0.771272	0.574956	0.532522	0.547595	1	0.131023	0.323489	0.0716726	0.782594	0.917129	1
LPC 20:3 sn-1	1.081e+07	1.13547e+07	0.340436	0.722718	1.0997e+07	1.1929e+07	1.12479e+07	0.717237	0.628451	0.106978	0.334659	0.621265	0.534662	0.476773	0.993647	0.0865698	0.257094	0.210356	1	0.814499	1
LPC 20:4 sn-1	2.72183e+07	2.57998e+07	0.114363	0.37299	2.56903e+07	2.5992e+07	2.54634e+07	0.127846	0.259816	0.267258	0.644384	0.139406	0.278743	0.915134	1	1.22238e-05	0.00085232	0.204822	1	0.00159827	0.0832017
LPC 20:4 sn-2	5.88724e+06	5.75234e+06	0.585685	0.852846	5.65743e+06	5.87549e+06	5.67363e+06	0.33184	0.46723	0.98471	1	0.606619	0.534459	0.699813	1	0.261744	0.478053	0.186288	1	0.795552	1
LPC 20:5 sn-1	1.43671e+06	1.16206e+06	0.000519384	0.00299614	1.14635e+06	1.21423e+06	1.14168e+06	0.000876542	0.00396435	0.0555821	0.201821	0.00147748	0.00516544	0.424769	0.941774	0.00214684	0.0300413	0.828398	1	0.000552143	0.0456771
LPC 20:5 sn-2	178269	151903	0.00123813	0.00730039	143993	161981	152232	0.000219388	0.000931908	0.140038	0.408702	0.00767026	0.0255366	0.120776	0.462812	0.125132	0.315305	0.638384	1	0.269697	0.742387
LPC 22:4	850431	1.00371e+06	0.000306267	0.00171397	1.02315e+06	985661	1.00293e+06	0.00333276	0.0145267	0.00680128	0.034152	0.00118857	0.00414881	0.898689	1	0.00127344	0.0218024	0.117075	1	0.12852	0.533476
LPC 22:5 sn-1	425638	572837	3.27859e-07	1.05477e-06	640936	511480	561354	8.49501e-08	2.28182e-07	0.00370407	0.0196655	1.83622e-05	5.09251e-05	0.00676091	0.0848386	0.406286	0.610058	0.143306	1	0.0407227	0.345129
LPC 22:5 sn-2	2.26237e+06	1.94614e+06	0.0011957	0.00704933	2.01897e+06	1.95275e+06	1.86479e+06	0.0478335	0.131225	0.0110748	0.0525592	0.000502803	0.00171776	0.235398	0.680216	0.200909	0.411386	0.654918	1	0.415617	0.916806
LPC 22:6 sn-1	4.31801e+06	4.69467e+06	0.269461	0.642109	4.73311e+06	4.61637e+06	4.73076e+06	0.256592	0.403013	0.407488	0.843692	0.454228	0.507203	0.87681	1	0.797505	0.809101	0.783852	1	0.920367	1
LPC 22:6 sn-2	884239	968662	0.208766	0.55437	968508	955416	979958	0.265075	0.410847	0.336883	0.749986	0.318017	0.44307	0.952429	1	0.0587512	0.207494	0.0350219	0.526769	0.946321	1
LPC o-16:0	4.02943e+06	2.41925e+06	1.63515e-16	3.31651e-08	2.31135e+06	2.55482e+06	2.41165e+06	1.35001e-13	2.87244e-08	7.07033e-10	5.01792e-08	3.52242e-11	2.57275e-08	0.232246	0.67495	3.55198e-06	0.000341886	0.535535	1	0.000337506	0.0344261
LPC O-16:1	3.65074e+06	2.0468e+06	1.24077e-20	3.31651e-08	2.00609e+06	2.05185e+06	2.07615e+06	1.99929e-15	2.87244e-08	6.50525e-14	5.01792e-08	6.45828e-14	2.57275e-08	0.806519	1	0.659441	0.766641	0.206196	1	0.0963564	0.476508
LPC O-18:0	1.06032e+06	602521	6.55135e-16	3.31651e-08	534006	643705	631061	3.99285e-14	2.87244e-08	1.30682e-09	5.01792e-08	4.27923e-10	2.57275e-08	0.00901054	0.10092	0.161393	0.363533	0.0203892	0.387778	0.314498	0.801262
LPC O-18:1	2.56339e+06	1.64924e+06	1.0331e-14	3.31651e-08	1.56028e+06	1.75209e+06	1.64557e+06	5.97405e-13	2.87244e-08	2.27621e-08	1.09313e-07	7.08088e-10	2.57275e-08	0.146813	0.517921	0.053219	0.196407	0.980106	1	0.103073	0.489035
LPE 16:0 sn-1	538619	1.07163e+06	2.72205e-27	3.31651e-08	1.06573e+06	1.0627e+06	1.09406e+06	5.49111e-20	2.87244e-08	6.84934e-19	5.01792e-08	7.20265e-18	2.57275e-08	0.731075	1	0.714172	0.788434	0.0619839	0.723313	0.0354248	0.327583
LPE 16:0 sn-2	41548.6	81876.7	2.20295e-26	3.31651e-08	81448.4	80375	84049.1	4.75618e-19	2.87244e-08	3.30169e-18	5.01792e-08	1.4858e-17	2.57275e-08	0.729529	1	0.0706393	0.229775	0.00641525	0.201163	0.174861	0.606839
LPE 18:0-1 sn-1	900671	1.6447e+06	1.83414e-24	3.31651e-08	1.62708e+06	1.65415e+06	1.66372e+06	5.40292e-17	2.87244e-08	4.78671e-17	5.01792e-08	7.65465e-17	2.57275e-08	0.938857	1	0.547646	0.708358	0.843378	1	0.608584	1
LPE 18:0-2 sn-2	172288	312298	7.6327e-23	3.31651e-08	301329	318232	319575	2.7585e-15	2.87244e-08	2.96786e-16	5.01792e-08	5.18201e-16	2.57275e-08	0.655591	1	0.552876	0.711461	0.925116	1	0.432169	0.932662
LPE 18:1 sn-1	312530	625443	1.12025e-31	3.31651e-08	661680	598995	615071	8.68393e-23	2.87244e-08	3.59754e-21	5.01792e-08	1.58998e-21	2.57275e-08	0.0361226	0.230103	0.665123	0.769132	0.515517	1	0.727181	1
LPE 18:1 sn-2	84344.9	174858	2.03829e-29	3.31651e-08	181397	168484	174442	1.69774e-21	2.87244e-08	2.15514e-19	5.01792e-08	5.29618e-20	2.57275e-08	0.211095	0.638762	0.0566866	0.203416	0.00117996	0.0781395	0.178785	0.612764
LPE 18:2 sn-1	852285	1.57384e+06	1.60021e-23	3.31651e-08	1.64271e+06	1.56282e+06	1.52246e+06	3.8988e-18	2.87244e-08	1.63962e-15	5.01792e-08	1.94897e-15	2.57275e-08	0.242267	0.691577	0.0171434	0.103259	0.940366	1	0.0197021	0.262088
LPE 18:2 sn-2	191993	358455	1.27075e-21	3.31651e-08	361164	363048	353136	2.20236e-15	2.87244e-08	1.5315e-14	5.01792e-08	2.81854e-15	2.57275e-08	0.888826	1	0.932882	0.810658	0.611226	1	0.900956	1
LPE 20:4 sn-1	544898	845128	7.76804e-24	3.31651e-08	862893	826478	843919	1.34489e-16	2.87244e-08	9.16259e-17	5.01792e-08	4.07417e-16	2.57275e-08	0.447246	0.965389	0.0127965	0.0870943	0.592526	1	0.0716216	0.425954
LPE 20:4 sn-2	228989	332918	4.60731e-18	3.31651e-08	337383	330896	329998	4.72137e-13	2.87244e-08	1.62831e-12	5.01792e-08	3.48997e-12	2.57275e-08	0.624251	1	0.00606953	0.0560973	0.019977	0.383301	0.655013	1
LPE 22:6 sn-1	242298	410434	7.54705e-18	3.31651e-08	405616	414749	413293	4.58419e-13	2.87244e-08	8.00623e-13	5.01792e-08	5.59007e-12	2.57275e-08	0.946938	1	0.256782	0.47289	0.068702	0.764912	0.608584	1
LPE 22:6 sn-2	91000.4	142577	5.36439e-13	3.31651e-08	139799	145939	142813	3.80362e-09	2.87244e-08	5.39734e-10	5.01792e-08	8.84485e-09	2.57275e-08	0.851063	1	0.0059975	0.0557006	0.0388375	0.558274	0.471403	0.965964
Lysine	6096.71	4927.04	9.70114e-07	3.26458e-06	5206.02	4946.65	4646.53	0.00218905	0.00977743	9.49595e-05	0.000529434	6.77555e-07	1.60214e-06	0.0707153	0.339979	0.448464	0.642386	0.737108	1	0.660917	1
Methionine	10461.3	17019.7	7.16822e-21	3.31651e-08	17965.5	16898.1	16279	6.6233e-17	2.87244e-08	2.42208e-12	5.01792e-08	2.54962e-14	2.57275e-08	0.153544	0.531487	0.494258	0.674551	0.912935	1	0.461414	0.958088
Monoethylhexyl phthalate	986445	979055	0.968894	0.853849	954513	996565	984148	0.277274	0.421834	0.529898	0.975731	0.813771	0.534662	0.215297	0.646074	0.550258	0.709912	0.937314	1	0.690746	1
N-Acetylneuraminic acid	32653.2	31919.5	0.551923	0.847795	26152.2	40418.7	29444.9	0.323927	0.461008	0.0149387	0.0681157	0.948474	0.534662	3.60818e-05	0.00248194	0.0205023	0.114506	0.348244	1	0.169731	0.599038
Ornithine	722.284	949.86	1.09154e-06	3.69697e-06	919.654	988.331	949.132	0.00123194	0.00557945	8.83094e-06	4.41824e-05	1.16525e-05	3.13433e-05	0.352831	0.855037	0.157905	0.359096	0.96481	1	0.214054	0.664656
P-cresol sulfate	381027	2.97652e+06	9.83217e-28	3.31651e-08	2.66656e+06	3.7033e+06	2.58196e+06	8.8778e-20	2.87244e-08	6.10586e-19	5.01792e-08	1.27865e-18	2.57275e-08	0.000844816	0.0226879	0.213606	0.425939	0.0251857	0.43721	0.338636	0.831322
P-cresyl glucuronide	1965.75	211425	4.9355e-34	3.31651e-08	166687	269853	204913	2.28177e-24	2.87244e-08	1.76272e-22	5.01792e-08	2.13307e-23	2.57275e-08	0.0905018	0.391959	0.144522	0.341701	0.980106	1	0.255788	0.723403
Phenyl sulfate	146676	1.17956e+06	1.70968e-34	3.31651e-08	1.31171e+06	1.02186e+06	1.19452e+06	3.44059e-24	2.87244e-08	4.55946e-23	5.01792e-08	6.01033e-24	2.57275e-08	0.0146457	0.135	0.360366	0.57179	0.0162386	0.34069	0.0722666	0.427385
phenylacetylglutamine	62955.7	2.41191e+06	1.1936e-35	3.31651e-08	2.00301e+06	2.87996e+06	2.39075e+06	5.35283e-25	2.87244e-08	3.91789e-24	5.01792e-08	1.89691e-24	2.57275e-08	0.00621809	0.0806338	0.136094	0.330415	0.000450824	0.0462234	0.032011	0.315339
Phenylacetylglycine	192.781	3778.19	2.13534e-35	3.31651e-08	4061	2567.59	4730.41	5.58074e-25	2.87244e-08	1.2621e-23	5.01792e-08	1.89691e-24	2.57275e-08	5.48529e-05	0.00333373	0.579384	0.72663	0.688491	1	0.699792	1
Phenylalanine	393024	478487	5.73277e-08	1.81235e-07	475493	474943	485012	8.19966e-06	2.61988e-05	1.03413e-05	5.21268e-05	1.14314e-05	3.07102e-05	0.950342	1	0.436826	0.633729	0.491053	1	0.868741	1
Phe-Phe	163919	83300.6	6.59581e-17	3.31651e-08	94769.6	80180.1	75435	1.16785e-09	2.87244e-08	9.92581e-12	5.01792e-08	3.40732e-14	2.57275e-08	0.0661655	0.327163	0.0222725	0.120092	0.167837	1	0.328437	0.818781
Proline	39333.8	58874.8	2.06991e-19	3.31651e-08	58970.6	61124.9	56791.3	8.95286e-15	2.87244e-08	7.0924e-15	5.01792e-08	4.53763e-11	2.57275e-08	0.219616	0.653525	0.0426468	0.17358	0.119788	1	0.660917	1
serotonin	6539.9	5657.91	0.00107634	0.00634069	4988.63	4647.08	6962.83	0.0177395	0.0615289	0.084951	0.28092	0.000146976	0.000471107	0.0686017	0.334072	0.183554	0.390879	0.330788	1	0.617178	1
Sphingosine-1-phosphate	138362	137789	0.917399	0.853849	127189	138563	148555	0.194097	0.339883	0.981313	1	0.270126	0.409869	0.0148817	0.136292	0.194097	0.403426	0.0978416	0.922759	0.663877	1
taurochenodeoxycholate	21199.5	76893.9	9.13272e-10	3.31651e-08	67654.3	81350	84477.6	1.15637e-07	3.10028e-07	3.41494e-06	1.63937e-05	2.16605e-07	5.06373e-07	0.802127	1	0.47226	0.659473	0.548241	1	0.943073	1
taurocholic acid	5878.82	26735.5	8.0915e-11	3.31651e-08	19243.6	29301.7	32957.4	3.08818e-08	8.46363e-08	4.83684e-06	2.35532e-05	3.78632e-09	2.57275e-08	0.723744	1	0.989061	0.810658	0.635644	1	0.660916	1
taurodeoxycholate	9256.79	28685.2	1.71899e-05	7.29966e-05	24733.1	35343.4	26458.6	4.43161e-05	0.000164366	0.00170947	0.00952782	0.000911014	0.00316682	0.916842	1	0.00500555	0.0500147	0.0722792	0.786154	0.226336	0.682222
tauroursodeoxycholate	2078.33	7404.15	8.05164e-07	2.68368e-06	8846.88	5012.75	8435.83	1.29005e-07	3.45806e-07	0.00822868	0.0404696	1.67156e-05	4.60603e-05	0.0391117	0.241052	0.000225982	0.00712942	0.500763	1	0.00222602	0.0993244
Thyroxine	10789.4	9139.03	0.00135036	0.00796234	7734.51	10247.6	9542.92	9.16604e-05	0.00036306	0.120589	0.366003	0.0169907	0.0527512	0.0117826	0.118552	0.222386	0.435795	0.224663	1	0.95282	1
TMAO	2322.24	82432.3	2.73805e-35	3.31651e-08	77266.9	83722.3	87196.2	1.85709e-24	2.87244e-08	5.5485e-24	5.01792e-08	2.06697e-24	2.57275e-08	0.192722	0.606026	0.352197	0.564637	0.517998	1	0.255788	0.723403
Tryptophan	251976	95976.7	1.39318e-34	3.31651e-08	103838	88327.1	95449	1.78207e-24	2.87244e-08	7.84875e-24	5.01792e-08	4.16527e-23	2.57275e-08	0.0155666	0.139993	0.205078	0.416206	0.232071	1	0.0108269	0.206705
Tyrosine	43305.1	37396.2	6.81909e-09	3.31651e-08	36721.1	35109.5	40522.7	8.04793e-06	2.56755e-05	1.75736e-07	7.99889e-07	8.72685e-06	2.30449e-05	0.687519	1	0.0289739	0.13957	0.399737	1	0.192335	0.632976
Uric acid	179693	208393	0.000522603	0.00301557	211503	206041	208704	0.000333824	0.00145675	0.00671455	0.0337618	0.0210162	0.0636267	0.741361	1	0.0104705	0.0774322	0.0446053	0.603201	1.25324e-05	0.00509204
ursodeoxycholic acid	26879.3	16670.9	2.80102e-05	0.000125122	14540.1	19309.5	16639.2	0.00119787	0.00542592	0.00113073	0.00640584	0.000144525	0.000462758	0.868956	1	6.95729e-06	0.000560236	0.00913828	0.245749	0.0654283	0.411805
*Note: GN, glomerulonephritis; DN, diabetic nephropathy; ON, other nephropathy.

## Sheet: ST4
Supplementary Table 4| Numbers of serum and faecal metabolites that significantly differed in their concentration among three types of nephropathy.
Comparison	Serum metabolites			Faecal metabolites
	No. of significant metabolites (q < 0.05)	Shared with patient vs. control	%	No. of significant metabolites (q < 0.05)	Shared with patient vs. control	%
Patient vs. control	134	134	1	98	98	1
Glomerular nephropathy vs. control	126	124	0.98	73	66	0.9
Diabetic nephropathy vs. control	127	123	0.97	134	86	0.64
Other nephropathy vs. control	131	128	0.98	87	82	0.94
Glomerular vs. diabetic nephropathy	16			58
Glomerular vs. other nephropathy	2			5
Diabetic vs. other nephropathy	3			26

## Sheet: ST5
Supplementary Table 5| Description of the metabolite clusters of 180 annotated metabolites in serum metabolome.
Cluster ID	Cluster name	Number of metabolites	Representative metabolite	Min rho	Average rho*	Containning metabolites
S01	S01: FFAs	24	FFA C17:1	0.6386	0.818	FFA C17:1; FFA C18:2; FFA C16:1; FFA C14:1-2; FFA C20:3; FFA C18:0; FFA C20:5-2; FFA C16:2; FFA C19:0; FFA C18:1; FFA C22:5; FFA C22:6; FFA C17:0; FFA C14:0; FFA C22:2; FFA C20:2; FFA C14:1-1; FFA C19:1; FFA C20:1; FFA C15:0; FFA C16:0; FFA C18:3; 1-Hexadecanol; Hexadecatrienoic acid
S02	S02: Carnitines	11	Carnitine C14:1	0.7631	0.8555	Carnitine C14:1; Carnitine C8:0; Carnitine C16:1; Carnitine C10:0; Carnitine C12:0; Carnitine C12:1; Carnitine C16:2; Carnitine C14:0; Carnitine C14:2; Carnitine C10:1;Carnitine C6:0
S03	S03: Carnitines	8	Carnitine C3:0	0.7371	0.8366	Carnitine C3:0; Carnitine C16:0; Carnitine C2:0; Carnitine C5; Carnitine C18:1; Carnitine C18:0; Carnitine C4; Carnitine C5:1
S04	S04: LPEs	8	LPE 16:0 sn-1	0.689	0.8741	LPE 16:0 sn-1; LPE 18:0-1 sn-1; LPE 22:6 sn-1; LPE 20:4 sn-2; LPE 22:6 sn-2; LPE 16:0 sn-2; LPE 18:0-2 sn-2; LPE 20:4 sn-1
S05	S05: Conjuncted primary bile acids	4	GCA	0.6703	0.8097	GCA; GCDCA; TCA; TCDCA
S06	S06: LPCs	4	LPC 14:0 sn-1	0.6817	0.7744	LPC 14:0 sn-1; LPC 14:0 sn-2; LPC 16:1 sn-1; LPC 16:1 sn-2
S07	S07: LPCs	4	LPC 16:0 sn-1	0.6712	0.7963	LPC 16:0 sn-1; LPC 16:0 sn-2; LPC 18:0 sn-1; LPC 18:0 sn-2
S08	S08: LPCs	4	LPC o-16:0	0.8316	0.8724	LPC o-16:0; LPC O-16:1; LPC O-18:0; LPC O-18:1
S09	S09: LPEs	4	LPE 18:2 sn-1	0.8268	0.8922	LPE 18:2 sn-1; LPE 18:1 sn-1; LPE 18:1 sn-2; LPE 18:2 sn-2
S10	S10: Serum uremia toxins	4	P-cresyl glucuronide	0.6917	0.8309	p-Cresyl glucuronide; p-Cresol sulfate; Indoxyl sulfate; Phenylacetylglutamine
S11	S11: Androsterone sulfates	3	Androsterone sulfate-1	0.6542	0.7418	Androsterone sulfate-1; Androsterone sulfate-2; Androsterone sulfate-3
S12	S12: Carnitines	3	Carnitine C8:1	0.8673	0.9032	Carnitine C8:1; Carnitine C10:2 *1; Carnitine C10:2 *2
S13	S13: Conjuncted secondary bile acids	3	Glycoursodeoxycholic acid	0.6323	0.711	GUDCA; GUDCS; TUDCA
S14	S14: FFADs	3	FFAD C22:0	0.8534	0.8686	FFAD C22:0; FFAD C20:0; Erucamide
S15	S15: FFAs	3	FFA C20:5-1	0.6765	0.7241	FFA C20:5-1; FFA C18:4; FFA C20:4
S16	S16: FFAs	3	FFA C22:0	0.7341	0.8252	FFA C22:0; FFA C20:0; FFA C24:0
S17	S17: LPCs	3	LPC 15:0 sn-1	0.6168	0.7392	LPC 15:0 sn-1; LPC 15:0 sn-2; LPC 17:0
S18	S18: Trp and quinoline	3	3-Methylisoquinoline	0.9436	0.9586	3-Methylisoquinoline; 4-Hydroxyquinoline; Tryptophan
S19	S19: Serum uremia toxins	2	Indolelactic acid	0.9998	0.9998	Indolelactic acid; Cinnamoylglycine
S20	S20: Serum uremia toxins	2	Phenylacetylglycine	0.7024	0.7024	Phenylacetylglycine; Hippuric acid
S21	S21: Androsterone sulfates	2	Androsterone sulfate-4	0.676	0.676	Androsterone sulfate-4; Dehydroepiandrosterone sulfate
S22	S22: BCAAs	2	Lysine	0.641	0.641	Lysine; Leucine/Isoleucine
S23	S23: Conjuncted primary bile acids	2	GCDCA-3-glucu	0.6863	0.6863	GCDCA-3-glucu; GDCS
S24	S24: Conjuncted secondary bile acids	2	taurodeoxycholate	0.8074	0.8074	TDCA; GDCA
S25	S25: FFAs	2	FFA C10:0	0.6987	0.6987	FFA C10:0; FFA C12:0
S26	S26: FFAs	2	FFA C24:1	0.8391	0.8391	FFA C24:1; FFA C22:1
S27	S27: LPCs	2	LPC 18:1 sn-2	0.9676	0.9676	LPC 18:1 sn-2; LPC 18:1 sn-1
S28	S28: LPCs	2	LPC 18:2 sn-2	0.9573	0.9573	LPC 18:2 sn-2; LPC 18:2 sn-1
S29	S29: LPCs	2	LPC 18:3 sn-1	0.9614	0.9614	LPC 18:3 sn-1; LPC 18:3 sn-2
S30	S30: LPCs	2	LPC 20:0 sn-2	0.9091	0.9091	LPC 20:0 sn-2; LPC 20:0 sn-1
S31	S31: LPCs	2	LPC 20:2 sn-1	0.9764	0.9764	LPC 20:2 sn-1; LPC 20:2 sn-2
S32	S32: LPCs	2	LPC 20:4 sn-1	0.9721	0.9721	LPC 20:4 sn-1; LPC 20:4 sn-2
S33	S33: LPCs	2	LPC 20:5 sn-2	0.9692	0.9692	LPC 20:5 sn-2; LPC 20:5 sn-1
S34	S34: LPCs	2	LPC 22:5 sn-1	0.6517	0.6517	LPC 22:5 sn-1; LPC 22:4
S35	S35: LPCs	2	LPC 22:6 sn-1	0.9804	0.9804	LPC 22:6 sn-1; LPC 22:6 sn-2
S36	S36: Primary bile acids	2	chenodeoxycholic acid	0.7562	0.7562	CDCA; CA
S37	S37: Serum uremia toxins	2	Phenyl sulfate	0.6895	0.6895	Phenyl sulfate; TMAO
singleton	1,7-Dimethylxanthine	1	1,7-Dimethylxanthine	1	1	1,7-Dimethylxanthine
singleton	1-Amlnocydohexanecarboxylic acid	1	1-Amlnocydohexanecarboxylic acid	1	1	1-Amlnocydohexanecarboxylic acid
singleton	3-(1-Pyrazolyl)-alanine	1	3-(1-Pyrazolyl)-alanine	1	1	3-(1-Pyrazolyl)-alanine
singleton	3-Indolepropionic acid	1	3-Indolepropionic acid	1	1	3-Indolepropionic acid
singleton	3-Methylhistidine	1	3-Methylhistidine	1	1	3-Methylhistidine
singleton	Arginine	1	Arginine	1	1	Arginine
singleton	Biliverdin	1	Biliverdin	1	1	Biliverdin
singleton	Carnitine	1	Carnitine	1	1	Carnitine
singleton	Carnitine C4:1	1	Carnitine C4:1	1	1	Carnitine C4:1
singleton	Carnitine C4-OH	1	Carnitine C4-OH	1	1	Carnitine C4-OH
singleton	Choline	1	Choline	1	1	Choline
singleton	Creatinine	1	Creatinine	1	1	Creatinine
singleton	DCA	1	DCA	1	1	DCA
singleton	D-Citramalic acid	1	D-Citramalic acid	1	1	D-Citramalic acid
singleton	Delta-valerolactam	1	Delta-valerolactam	1	1	Delta-valerolactam
singleton	Farnesylacetone	1	Farnesylacetone	1	1	Farnesylacetone
singleton	FFA C11:0	1	FFA C11:0	1	1	FFA C11:0
singleton	FFA C9:0	1	FFA C9:0	1	1	FFA C9:0
singleton	GCDCS	1	GCDCS	1	1	GCDCS
singleton	Glutamic acid	1	Glutamic acid	1	1	Glutamic acid
singleton	Glutamine	1	Glutamine	1	1	Glutamine
singleton	Homocysteine	1	Homocysteine	1	1	Homocysteine
singleton	Homoserine	1	Homoserine	1	1	Homoserine
singleton	Hydrocortisone	1	Hydrocortisone	1	1	Hydrocortisone
singleton	Hypoxanthine	1	Hypoxanthine	1	1	Hypoxanthine
singleton	Kynurenine	1	Kynurenine	1	1	Kynurenine
singleton	LA	1	Lactic acid	1	1	Lactic acid
singleton	LPC 20:1	1	LPC 20:1	1	1	LPC 20:1
singleton	LPC 20:3 sn-1	1	LPC 20:3 sn-1	1	1	LPC 20:3 sn-1
singleton	LPC 22:5 sn-2	1	LPC 22:5 sn-2	1	1	LPC 22:5 sn-2
singleton	Methionine	1	Methionine	1	1	Methionine
singleton	Monoethylhexyl phthalate	1	Monoethylhexyl phthalate	1	1	Monoethylhexyl phthalate
singleton	N-Acetylneuraminic acid	1	N-Acetylneuraminic acid	1	1	N-Acetylneuraminic acid (NANA)
singleton	Ornithine	1	Ornithine	1	1	Ornithine
singleton	Phenylalanine	1	Phenylalanine	1	1	Phenylalanine
singleton	Phe-Phe	1	Phe-Phe	1	1	Phe-Phe
singleton	Proline	1	Proline	1	1	Proline
singleton	Serotonin	1	serotonin	1	1	serotonin
singleton	Sphingosine-1-phosphate	1	Sphingosine-1-phosphate	1	1	Sphingosine-1-phosphate
singleton	Thyroxine	1	Thyroxine	1	1	Thyroxine
singleton	Tyrosine	1	Tyrosine	1	1	Tyrosine
singleton	UA	1	Uric acid	1	1	Uric acid
singleton	UDCA	1	ursodeoxycholic acid	1	1	UDCA
* Note: rho, Spearman correlation coefficient

## Sheet: ST6
Supplementary Table 6| Differential metabolites analysis of 255 annotated faecal metabolites and its correlation with primary disease types.
Metabolite name	Avg. abun. control	Avg. abun. ESRD	P-value (ESRD vs. control)	q	Avg. abun. GN*	Avg. abun. DN*	Avg. abun. ON*	P-value (GN vs. control)	q	P-value (DN vs. control)	q	P-value (ON vs. control)	q	P-value (GN/DN/ON, k-w test)	q	P-value (GN vs. DN)	q	P-value (GN vs. ON)	q	P-value (DN vs. ON)	q
(-)-Borneol	0.0969903	0.622566	0.000203941	0.00227711	0.693656	0.209641	0.965724	0.00307768	0.0323745	0.0230307	0.0399004	5.03435e-05	0.000675466	0.473795	0.60111	0.529538	0.72694	0.140186	0.569065	0.166706	0.305707
(-)-Menthone	0.0450919	0.928885	1.00893e-22	2.32481e-07	0.889296	0.536575	1.36472	4.9288e-19	3.9498e-07	2.79872e-12	1.09273e-07	2.92751e-17	3.03042e-07	0.0006933	0.00676058	0.00114743	0.010693	0.685668	1	0.0014651	0.0186322
(+)-2-Bornanone	0.00669482	0.0173369	0.000177296	0.00201378	0.00931733	0.0159499	0.027632	0.351864	0.725511	2.09343e-06	1.24354e-05	0.000196235	0.00217275	0.00155021	0.0121571	0.000895505	0.00889334	0.00418491	0.0934382	0.893924	0.663056
(1R)-2,6,6-Trimethylbicyclo[3.1.1]hept-2-ene	0.0586985	0.10056	0.98523	0.865772	0.108772	0.140219	0.0441274	0.419754	0.778093	0.0742523	0.100496	0.239665	0.500291	0.0391468	0.131459	0.12976	0.344467	0.643876	1	0.00984011	0.0538628
(2E,4E)-3,7-Dimethylocta-2,4-diene	0.0476799	0.0601363	0.102351	0.351669	0.0605991	0.112563	0.0103483	0.692154	0.867776	0.000482444	0.00159725	0.316444	0.582505	6.18912e-05	0.00129474	7.17936e-05	0.00150786	0.0636103	0.374196	0.00267834	0.0256505
(S)-3,4-Dimethylpentanol	0.0118541	0.0167995	0.0249711	0.124412	0.0169819	0.023445	0.0104761	0.266674	0.639637	0.00154236	0.00433588	0.171405	0.406965	0.190765	0.365988	0.146316	0.370357	0.816458	1	0.120841	0.253512
1,1-Dichloropentane	0.027488	0.006594	3.23222e-08	6.74409e-07	0.0026482	0.00589033	0.0115375	5.07069e-09	3.9498e-07	3.12972e-06	1.78892e-05	0.00122516	0.00992672	0.545287	0.64955	0.90493	0.77076	0.0388375	0.287556	0.486607	0.58521
1,2-Benzenedicarboxylic acid, bis(2-methylpropyl) ester	0.226868	0.220371	0.116395	0.383575	0.184636	0.27827	0.17878	0.0912955	0.354453	0.976357	0.511288	0.0126951	0.0624475	0.480222	0.605519	0.717234	0.77076	0.419342	0.915041	0.191876	0.331958
1,3-Cyclohexadiene, 5-(1,5-dimethyl-4-hexenyl)-2-methyl-, [S-(R*,S*)]-	0.0890556	0.448947	5.32174e-08	1.0675e-06	0.402244	0.547409	0.38628	6.80858e-05	0.00128997	2.69242e-08	2.5647e-07	7.62613e-05	0.000968432	0.128849	0.2892	0.0983209	0.289954	0.919023	1	0.0902437	0.213412
1,4-Methano-1H-Cyclopropa[d]pyridazine, 4,4a,5,5a-tetrahydro-6,6-dimethyl-	0.144456	0.193835	0.255809	0.620451	0.332731	0.210672	0.0360895	0.651573	0.867066	0.0253224	0.0430227	0.835621	0.718028	0.333952	0.498973	0.394703	0.640326	0.849386	1	0.119565	0.251944
1,4-p-Menthadien-7-al	0.0216	0.0158324	0.120553	0.39265	0.0296566	0.00807454	0.00922229	0.798969	0.867776	0.00576609	0.0130492	0.175635	0.413378	0.0127807	0.0587733	0.00532395	0.0346382	0.0772844	0.415574	0.215954	0.356083
1,7-Di(3-ethylphenyl)-2,2,4,4,6,6-hexamethyl-1,3,5,7-tetraoxa-2,4,6-trisilaheptane	0.0060259	2.04058e-08	2.17383e-18	2.32481e-07	1.83036e-08	2.37467e-08	1.92421e-08	8.6172e-15	3.9498e-07	1.52163e-11	1.09273e-07	3.5587e-13	3.03042e-07	5.90314e-05	0.00125549	3.88386e-05	0.000998323	0.0147673	0.174724	0.0207512	0.0852861
13-Methyltetradecanal	0.0186445	0.0121335	0.706595	0.865772	0.0116615	0.0128209	0.0123003	0.154672	0.481288	0.344096	0.324754	0.749684	0.718028	0.0386188	0.130222	0.0139131	0.0727628	0.182482	0.64837	0.247226	0.386387
14-Octadecenoic acid, methyl ester	0.0128736	0.0125763	0.680562	0.865772	0.00943962	0.018136	0.010638	0.0753233	0.315233	0.0749948	0.101284	0.366196	0.624511	0.00174079	0.0132461	0.0013785	0.0122705	0.315755	0.824956	0.00868868	0.0500018
1-Butanol	0.363037	0.164321	1.07286e-08	2.47647e-07	0.0991835	0.170886	0.226745	9.58994e-09	3.9498e-07	1.18992e-05	5.9753e-05	3.99836e-05	0.00055233	0.612437	0.694406	0.414079	0.655188	0.382782	0.886883	0.894498	0.663056
1-Butene, 4-isothiocyanato-	0.0110206	0.00920978	0.727673	0.865772	0.0153234	0.00491318	0.00718959	0.603019	0.860077	0.276839	0.277482	0.770071	0.718028	0.842598	0.828999	0.371886	0.621831	0.344315	0.853065	0.260944	0.399391
1-Cyclohexyldimethylsilyloxyoctadecane	0.00755124	0.0257262	0.077726	0.290373	0.0255947	0.0218364	0.0299835	0.0202277	0.13245	0.539707	0.4352	0.210685	0.463211	0.384263	0.537528	0.738915	0.77076	0.46254	0.943492	0.637433	0.653311
1-Decanol	0.00346941	0.00538044	0.0239632	0.120494	0.00446174	0.0049316	0.006936	0.91648	0.867776	0.000324157	0.00112964	0.0420938	0.152673	0.0027596	0.0186696	0.000685347	0.00730554	0.0333963	0.265627	0.348576	0.478825
1-Heptadecyne	0.0178013	0.0315563	0.0392069	0.175763	0.0344359	0.0209042	0.0393135	0.148564	0.470594	0.205775	0.222053	0.0152967	0.0719229	0.457637	0.589954	0.80356	0.77076	0.399737	0.900411	0.206626	0.346832
1-Heptanol, 3-methyl-	0.0388923	0.0209602	0.482295	0.820248	0.0189433	0.0250222	0.0192388	0.785773	0.867776	0.0569619	0.0815993	0.89527	0.718028	0.167392	0.338954	0.0713863	0.235702	0.61932	0.99957	0.233387	0.373099
1-Hexadecanol	0.33322	0.474173	0.0598134	0.240518	0.448369	0.583989	0.40514	0.336582	0.711844	0.0130404	0.0253245	0.159171	0.387907	0.289439	0.46214	0.701295	0.77076	0.816458	1	0.221673	0.361702
1-Hexadecyne	0.0054649	0.0129584	0.00371654	0.0268908	0.0134892	0.0169112	0.00885274	0.0216522	0.138885	0.000399409	0.00135529	0.143902	0.362993	0.285168	0.458437	0.665166	0.768744	0.421555	0.916625	0.0816756	0.201023
1-Hexanol	0.172807	0.11989	0.246345	0.607886	0.0793198	0.199199	0.0859571	0.108936	0.393771	0.410511	0.366749	0.0353795	0.134412	0.0699615	0.19524	0.0942805	0.28233	0.543141	0.982207	0.0402164	0.129621
1H-Pyrrole-2,5-dione, 3-ethyl-4-methyl-	0.0749108	0.0783594	0.754311	0.865772	0.0756201	0.0886259	0.0706952	0.606005	0.860697	0.280887	0.280466	0.329551	0.594392	0.751973	0.784904	0.486865	0.703909	0.187569	0.656936	0.309646	0.444328
1-Nonanol	0.0158205	0.0210986	0.142631	0.438267	0.0278204	0.0190516	0.0161542	0.12075	0.418171	0.103095	0.129975	0.692905	0.718028	0.402512	0.550908	0.827893	0.77076	0.258552	0.759704	0.235872	0.375499
1-Octen-3-ol	0.127919	0.0946222	0.494466	0.82634	0.0834086	0.0855512	0.115826	0.457698	0.802075	0.226066	0.238487	0.818239	0.718028	0.252323	0.428763	0.625768	0.76194	0.232071	0.724656	0.578582	0.634156
1-Pentadecyne	0.134445	0.135534	0.244911	0.605946	0.152189	0.0810011	0.172131	0.559039	0.848205	0.0178519	0.0325718	0.955518	0.718028	0.425174	0.567179	0.772372	0.77076	0.495896	0.961853	0.12875	0.263057
1-Pentene, 4,4-dimethyl-1,3-diphenyl-1-(trimethylsilyloxy)-	0.65428	0.663326	0.42702	0.78709	0.673505	0.740667	0.577434	0.0444703	0.225597	0.162265	0.185018	0.165883	0.39846	0.0304387	0.110176	0.0238369	0.109055	0.789754	1	0.0334944	0.115449
1-Propanol	0.313921	0.230259	0.000151782	0.00175625	0.176402	0.271596	0.247401	7.31636e-05	0.0013744	0.000552659	0.00179705	0.0411996	0.150295	0.244189	0.421052	0.898696	0.77076	0.124421	0.535212	0.88081	0.663056
1-Propanol, 2-methyl-	0.00702209	0.0069717	0.474634	0.816193	0.005021	0.0118875	0.00420476	0.27789	0.652374	0.186841	0.20625	0.0334783	0.129056	0.0206481	0.0834609	0.137823	0.357287	0.242732	0.739185	0.00637585	0.0416895
1-Propanone, 1-cyclopropyl-	1.69569e-08	0.0270242	2.83153e-05	0.000388079	0.0104407	0.0224476	0.0497292	0.0229052	0.144412	5.88469e-07	3.95491e-06	0.00169382	0.0128995	0.0399568	0.133346	0.0303477	0.130139	0.389088	0.892011	0.0567207	0.160817
1-Tetradecanol	0.0339975	0.0327029	0.41481	0.778524	0.031257	0.0415859	0.0252085	0.789067	0.867776	0.0294675	0.0485162	0.702811	0.718028	0.0525332	0.160987	0.156789	0.385917	0.457879	0.940673	0.0168503	0.0748663
1-Tetradecene	0.0127632	0.0131213	0.203959	0.546188	0.0117132	0.0151929	0.0126845	0.449959	0.797486	0.716991	0.497831	0.0411996	0.150295	0.294719	0.466674	0.982811	0.77076	0.122551	0.531019	0.254085	0.392909
2(3H)-Furanone, 5-heptyldihydro-	0.269446	0.325629	0.0230972	0.117091	0.26355	0.405824	0.319433	0.539062	0.841161	0.00288576	0.00735205	0.0206832	0.0902425	0.084299	0.220756	0.0213429	0.100472	0.0867209	0.442123	0.308644	0.443423
2,2,4-Trimethyl-1,3-pentanediol diisobutyrate	0.0369676	0.025688	0.0700417	0.269604	0.0170066	0.0265436	0.0337939	0.000242161	0.00390231	0.426243	0.376023	0.994659	0.718028	0.00041373	0.00468221	0.00354051	0.0252395	6.77345e-05	0.0147995	0.509901	0.59962
2,3-Butanedione	0.408273	0.420419	0.247064	0.608856	0.327893	0.507551	0.407986	0.704827	0.867776	0.0337991	0.0540758	0.846089	0.718028	0.526466	0.636901	0.335284	0.589917	0.870481	1	0.32417	0.457359
2,3-Pentanedione	0.226005	0.336454	0.108029	0.364812	0.307762	0.325706	0.384124	0.188103	0.535432	0.0552021	0.0796099	0.390341	0.641929	0.751243	0.784463	0.532106	0.728187	0.931213	1	0.496888	0.591726
2,4-Difluorobenzene, 1-benzyloxy-	0.0212366	0.00984784	0.820762	0.865772	0.00570166	0.0099456	0.0144029	0.372149	0.742579	0.527717	0.429599	0.385436	0.638544	0.923405	0.83339	0.205078	0.451048	0.0753753	0.410015	0.643271	0.654661
2,4-Imidazolidinedione, 1-methyl-	0.000604461	0.00201293	0.000651876	0.00622569	0.00130785	0.00071191	0.00407799	0.328043	0.703896	0.000141846	0.000546517	0.000196235	0.00217275	0.0333689	0.117558	0.0721667	0.2374	0.00375067	0.0886198	0.509901	0.59962
2,5-Dihydroxybenzaldehyde, 2TMS derivative	0.202594	0.194121	0.968355	0.865772	0.202733	0.20392	0.175807	0.429687	0.784733	0.301729	0.295543	0.709443	0.718028	0.585558	0.676488	0.24287	0.496026	0.61932	0.99957	0.647743	0.655627
2,5-Dimethylpyrazine	0.00104437	0.00483613	0.020087	0.104985	0.00594599	0.00386372	0.00291708	0.457698	0.802075	0.000189985	0.000707079	0.212316	0.465393	0.0266371	0.100214	0.037097	0.150331	0.592526	0.995797	0.017073	0.075481
269_Xylene	0.0658772	0.154571	3.0422e-06	4.83791e-05	0.130243	0.149074	0.188775	1.49389e-05	0.000333064	8.24541e-05	0.000338025	0.000479826	0.00459727	0.978602	0.83339	0.830947	0.77076	0.888637	1	0.94957	0.663056
272_Xylene	0.195949	0.360374	0.0296413	0.142026	0.270142	0.349638	0.473483	0.117707	0.412019	0.0811557	0.107757	0.0219399	0.0943129	0.591881	0.680706	0.779416	0.77076	0.29406	0.801719	0.539145	0.615843
2-Bromomethyl-1,3-dioxolane	0.000429012	0.0317007	4.07796e-09	2.32481e-07	0.00922906	0.050859	0.0376753	0.168779	0.504996	1.95498e-11	1.09273e-07	1.95812e-11	3.03042e-07	1.09366e-09	2.32274e-06	6.81447e-08	1.1735e-05	6.99464e-09	9.16729e-06	0.93658	0.663056
2-Butanone	0.0824365	0.159462	0.00108985	0.00964009	0.106913	0.302134	0.07942	0.0587874	0.269957	3.43793e-05	0.000154953	0.0331087	0.128004	0.0338836	0.11883	0.0349842	0.144171	0.983166	1	0.0261057	0.0985804
2-Butanone, 3-methyl-	0.00183394	0.00218758	0.07366	0.279492	0.00172798	0.00274912	0.00207019	0.645416	0.866555	0.0182968	0.0332183	0.120983	0.323035	0.789009	0.80606	0.365568	0.616521	0.255332	0.755624	0.308644	0.443423
2-Decanone	0.0502936	0.0482822	0.50793	0.832578	0.048539	0.0490531	0.0476497	0.704827	0.867776	0.492581	0.412286	0.563351	0.714002	0.951244	0.83339	0.824842	0.77076	0.777962	1	0.888047	0.663056
2-Dodecanone	0.0170438	0.0217987	0.106491	0.361285	0.0205933	0.0267341	0.0179511	0.36986	0.740713	0.00576609	0.0130492	0.759856	0.718028	0.161532	0.331836	0.225538	0.475957	0.530494	0.977433	0.0730014	0.187814
2-Heptanone	0.0734672	0.0564468	0.0230972	0.117091	0.0321911	0.0921659	0.0472957	5.3789e-05	0.00104743	1	0.511288	0.113673	0.309582	0.0017284	0.0131761	0.00131696	0.0118562	0.00335778	0.0840348	0.855014	0.663056
2-Heptanone, 5-methyl-	0.0170652	0.0615537	3.58126e-16	2.32481e-07	0.041787	0.0754002	0.068619	1.87408e-10	3.9498e-07	4.39479e-13	1.09273e-07	2.4243e-11	3.03042e-07	0.343905	0.506825	0.0993543	0.291878	0.479059	0.952985	0.740161	0.663056
2-Heptenal, (Z)-	0.0267339	0.0166408	0.000583799	0.00566473	0.014688	0.0172118	0.018477	0.00181932	0.0212327	0.00880719	0.0184418	0.00808755	0.0442271	0.956745	0.83339	0.809626	0.77076	0.79271	1	0.965825	0.663056
2-Hexadecene, 3,7,11,15-tetramethyl-, [R-[R*,R*-(E)]]-	1.69569e-08	0.0104082	3.45885e-06	5.46234e-05	0.0125105	0.0134462	0.00552471	0.00475915	0.0455458	3.58446e-08	3.29055e-07	0.00130395	0.0104417	0.0311193	0.111913	0.104665	0.301611	0.983166	1	0.00637585	0.0416895
2-Hexanol	0.000833362	0.00619766	0.00962016	0.058445	0.00734802	0.00961568	0.00183248	0.766096	0.867776	2.20904e-05	0.000104236	0.0536121	0.182023	0.000476372	0.00517235	0.000377372	0.00474936	0.0812208	0.426833	0.0114371	0.0589847
2-Hexene, 3,5,5-trimethyl-	0.00262997	0.00536119	0.00190902	0.0154533	0.00536203	0.00496026	0.00557994	0.00770969	0.0657898	0.00729034	0.0158116	0.0279707	0.113	0.957507	0.83339	0.967192	0.77076	0.819439	1	0.779853	0.663056
2-Methyl-3-heptanone	0.0168457	0.0224272	0.0378834	0.171259	0.020396	0.0259586	0.0208757	0.261185	0.633228	0.0417675	0.0639115	0.0552925	0.186128	0.593555	0.681823	0.324537	0.58001	0.488642	0.958133	0.761133	0.663056
2-Methyl-4-heptanone	0.00870982	0.00146618	0.0248573	0.123972	0.00108081	0.000977973	0.00238834	0.00543429	0.050448	0.12836	0.154237	0.204251	0.454487	0.283719	0.457173	0.234069	0.485947	0.0333963	0.265627	0.907421	0.663056
2-Methylpropyl butanoate	0.0123064	0.00330565	0.754311	0.865772	0.00175311	0.00521153	0.00318332	0.0623079	0.280066	0.186841	0.20625	0.874132	0.718028	0.000115474	0.00195269	3.609e-05	0.000950543	0.0180231	0.193292	0.0644072	0.17396
2-Nonanol	0.059646	0.0617848	0.938864	0.865772	0.0671978	0.0776464	0.0396188	0.481358	0.815159	0.03953	0.0611952	0.205846	0.456667	0.00454334	0.0271382	0.0250278	0.113047	0.763294	1	0.00129075	0.0174494
2-Nonanone	0.105434	0.137562	0.526176	0.840196	0.12611	0.185094	0.104229	0.967564	0.867776	0.0735158	0.0997125	0.856584	0.718028	0.398946	0.548314	0.301701	0.558122	0.906852	1	0.215954	0.356083
2-Octanone	0.0751878	0.13137	0.137423	0.427875	0.11231	0.202261	0.0848817	0.815544	0.867776	0.00210219	0.00563467	0.63144	0.718028	0.0329838	0.116601	0.0265918	0.118194	0.822423	1	0.0339089	0.116352
2-Octenal, (E)-	0.00302269	0.0030089	0.534263	0.843264	0.00300797	0.00325614	0.00277347	0.723991	0.867776	0.789675	0.509808	0.132058	0.342747	0.44302	0.579766	0.396396	0.641655	0.173828	0.633354	0.147434	0.28462
2-Octene, 2-methyl-6-methylene-	0.00725186	0.0192106	0.947284	0.865772	0.0113253	0.043954	0.00381878	0.218471	0.579102	0.0599984	0.0850007	0.634617	0.718028	0.00282364	0.0189929	0.00285339	0.0213652	0.295829	0.803678	0.00905795	0.0512572
2-Oxohexane	1.69569e-08	0.0593725	8.75101e-22	2.32481e-07	0.0463142	0.0975321	0.0370908	9.61191e-12	3.9498e-07	2.11017e-17	1.09273e-07	9.21967e-18	3.03042e-07	0.168871	0.340727	0.10145	0.295749	0.600509	0.997198	0.161696	0.30032
2-Pentadecanone	0.0793013	0.0967122	0.0684217	0.265112	0.0933399	0.132172	0.0668715	0.162252	0.494192	0.00422168	0.0100908	0.749684	0.718028	0.0869413	0.22524	0.4257	0.663728	0.283596	0.789879	0.0215679	0.0873829
2-Pentenoic acid, 4-hydroxy-	0.0218358	0.0278791	0.0174251	0.0938786	0.0267495	0.0289328	0.0279857	0.261185	0.633228	0.010881	0.0218865	0.0235353	0.0993859	0.322079	0.489437	0.733448	0.77076	0.285323	0.791862	0.745639	0.663056
2-Piperidinone	0.221805	0.217809	0.623399	0.864304	0.213617	0.170376	0.253571	0.525015	0.835603	0.501246	0.416679	0.941306	0.718028	0.764915	0.792591	0.932882	0.77076	0.579332	0.992983	0.484055	0.583556
2-Propanol, 1-methoxy-	0.0296702	0.0177432	0.563647	0.852817	0.0206631	0.019226	0.0128567	0.766096	0.867776	0.765208	0.506949	0.118858	0.319161	0.365681	0.523601	0.911109	0.77076	0.087429	0.444056	0.126065	0.259848
2-Tetradecanone	0.0303579	0.0309189	0.628396	0.864763	0.0297056	0.0386451	0.0246619	0.756313	0.867776	0.142679	0.167464	0.566368	0.714464	0.485471	0.60911	0.205078	0.451048	0.35419	0.862174	0.161696	0.30032
2-Tridecanone	0.079552	0.115594	0.0288574	0.139128	0.115928	0.153696	0.0797715	0.0826192	0.333629	0.00210219	0.00563467	0.530687	0.707269	0.162644	0.333197	0.477801	0.698474	0.338475	0.847535	0.0492744	0.147299
2-Undecanone	0.102322	0.17841	0.0657901	0.257725	0.191062	0.207767	0.137758	0.0954744	0.364113	0.0399691	0.061731	0.441447	0.672683	0.426983	0.568463	0.722959	0.77076	0.360201	0.86757	0.206626	0.346832
2-Undecene, 9-methyl-, (E)-	0.0333153	0.0330556	0.210307	0.556029	0.0395504	0.038253	0.0215378	0.588186	0.856642	0.716991	0.497831	0.0235353	0.0993859	0.707707	0.757162	0.989061	0.77076	0.0962961	0.467607	0.391436	0.514973
3(2H)-Thiophenone, dihydro-2-methyl-	0.00202902	0.00129198	0.261757	0.628138	0.000574495	0.000772363	0.00259039	0.00943051	0.0764533	0.921909	0.511288	0.94841	0.718028	0.00364391	0.0229944	0.00183532	0.015238	0.00449924	0.0967835	0.422665	0.539767
3,4-Dihydroxyphenylglycol	0.0819977	0.0278316	2.89347e-08	6.09341e-07	0.0203632	0.0343581	0.0288235	1.36357e-08	5.22223e-07	0.000442883	0.0014828	2.88625e-06	5.21675e-05	0.0484847	0.1524	0.0160076	0.0809461	0.0630643	0.372464	0.98981	0.663056
3,4-Hexanedione	0.0149112	0.00911824	0.399841	0.767391	0.011791	0.00861798	0.0070366	0.536238	0.840084	0.253387	0.259837	0.726119	0.718028	0.825406	0.823119	0.989061	0.77076	0.699824	1	0.499477	0.593328
309_Xylene	0.229635	0.0941447	1.07507e-11	2.32481e-07	0.0949787	0.102939	0.0857053	1.4079e-09	3.9498e-07	1.35972e-06	8.41897e-06	2.60105e-09	3.03042e-07	0.654603	0.722403	0.368654	0.619124	0.840377	1	0.517794	0.60421
3-Hexanol, 2-methyl-	0.000244318	0.00328777	8.86728e-08	1.71464e-06	0.00331249	0.00333006	0.00326286	3.14571e-05	0.000650101	8.76782e-07	5.6651e-06	3.22934e-05	0.000457914	0.975	0.83339	0.976562	0.77076	0.986226	1	0.751825	0.663056
3-Octanol	0.0105836	0.00736887	0.0237441	0.119636	0.00591653	0.00740174	0.00903704	0.0199984	0.131398	0.0431608	0.0655865	0.254234	0.517622	0.442978	0.579736	0.770415	0.77076	0.247405	0.745371	0.314498	0.448701
3-Pentanol	0.0572491	0.143244	0.0164502	0.0897049	0.151545	0.142039	0.136787	0.188103	0.535432	0.00434471	0.0103336	0.0862049	0.255479	0.225639	0.402855	0.539163	0.73153	0.646629	1	0.975669	0.663056
3-Pentanone, 2-methyl-	0.00215975	0.00317246	0.0204675	0.106541	0.00307737	0.00397727	0.00241336	0.519449	0.833263	0.00100294	0.00300345	0.0724806	0.225992	0.123131	0.281162	0.0661289	0.224027	0.235083	0.72882	0.274385	0.41198
3-Phenylpropanol	0.0435773	0.0293868	0.0157508	0.0866726	0.0238334	0.0464321	0.0192983	0.015866	0.111581	0.147715	0.172035	0.0377818	0.141057	0.421486	0.564554	0.223874	0.473982	0.584593	0.994178	0.363932	0.492023
3-Pyridinecarbonitrile	0.00340146	0.00426179	0.475725	0.81678	0.00355199	0.00440939	0.00498589	0.0477409	0.236246	0.551831	0.440702	0.72947	0.718028	0.00677385	0.0366288	0.00281232	0.0211279	0.0272547	0.238964	0.423551	0.540449
4,5-Nonadiene	0.0167362	0.00770238	1.46424e-06	2.41864e-05	0.00392242	0.0076421	0.0117319	1.23399e-07	3.94121e-06	0.00320111	0.00801734	0.000192794	0.00214046	0.0673735	0.190399	0.0462084	0.175458	0.0172897	0.189253	0.558182	0.625212
4-Acetoxy-3-methoxystyrene	0.00591032	0.00705583	0.916449	0.865772	0.00959565	0.00517616	0.0062222	0.815544	0.867776	0.282926	0.281962	0.380569	0.635108	0.691214	0.746471	0.277026	0.533131	0.2203	0.707904	0.339253	0.470692
4-Hydroxy-3-hexanone	0.0027644	0.00357795	0.000727277	0.00683583	0.00514604	0.00395755	0.00165308	0.189543	0.537613	1.29358e-05	6.4422e-05	0.00618819	0.0359561	0.067786	0.191176	0.0483638	0.181098	0.200742	0.678279	0.138539	0.274512
4-Methyl-2,4-bis(p-hydroxyphenyl)pent-1-ene, 2TMS derivative	0.0079628	0.0123686	0.0274665	0.133929	0.0103769	0.0166614	0.0102123	0.615005	0.862418	0.00106993	0.00317445	0.0845833	0.25209	0.0763703	0.206905	0.0285849	0.124602	0.218859	0.7058	0.327142	0.460002
4-Octanone, 5-hydroxy-2,7-dimethyl-	0.030818	0.0736279	0.000377405	0.00389116	0.0620669	0.0872243	0.0727027	0.104291	0.383776	8.97427e-07	5.78531e-06	0.0246539	0.102884	0.072525	0.199959	0.0402473	0.15927	0.737108	1	0.0892543	0.212012
5,9-Undecadien-2-one, 6,10-dimethyl-	0.0420413	0.053676	0.514733	0.835531	0.0584969	0.065838	0.0378494	0.688999	0.867776	0.0159652	0.0297887	0.345281	0.607875	0.0179237	0.075317	0.234069	0.485947	0.203455	0.682531	0.00350986	0.0297366
5H-Tetrazol-5-amine	0.00112503	0.00280035	0.00128012	0.0110444	0.00129022	0.00231496	0.00431282	0.603019	0.860077	0.000113554	0.000448938	0.000303545	0.00313761	0.00320811	0.0208988	0.00320267	0.0233562	0.00168892	0.0610109	0.617178	0.647853
5-hydroxy-7-methoxyflavanone, tert.-butyldimethylsilyl ether	1.69569e-08	0.00173817	5.01155e-07	8.74342e-06	0.000699841	0.00232184	0.00231501	0.0718776	0.306234	2.79263e-09	1.09273e-07	1.3621e-06	2.61716e-05	0.000183375	0.00266622	0.000100455	0.0018931	0.000793833	0.0438925	0.36178	0.490189
5-Tetradecene, (E)-	0.0345957	0.024939	0.962734	0.865772	0.0257253	0.0347174	0.0152341	0.550434	0.845296	0.110017	0.13675	0.352166	0.613513	0.162854	0.333455	0.20535	0.451388	0.819439	1	0.0658998	0.176426
7-epi-a-Eudesmol	0.000993144	0.00137312	0.111951	0.373695	0.00202531	0.00137348	0.00066517	0.848936	0.867776	0.0018305	0.00501323	0.322954	0.588484	0.00382473	0.0238458	0.00654349	0.04066	0.2203	0.707904	0.00665366	0.0427354
9-Octadecenoic acid, ethyl ester	0.00910059	0.0078125	0.227479	0.581562	0.00732949	0.00873844	0.00761523	0.500211	0.824575	0.0938113	0.12072	0.37334	0.629862	0.492345	0.6138	0.298332	0.554793	0.934263	1	0.306709	0.441672
9-Tetradecenal, (Z)-	0.00549956	0.00588907	0.422927	0.78427	0.00531328	0.00646875	0.0060007	0.390775	0.757216	0.137775	0.162974	0.732826	0.718028	0.68008	0.739191	0.584757	0.750066	0.14648	0.58187	0.29022	0.426628
Acetic acid	1.55094	0.680889	1.76013e-09	2.32481e-07	0.484116	0.7535	0.8241	3.02119e-09	3.9498e-07	1.95648e-06	1.16975e-05	2.09207e-05	0.000312034	0.334301	0.49925	0.356257	0.608544	0.0327643	0.262986	0.672787	0.659945
Acetic acid, hexyl ester	0.00250505	0.00240326	0.0617535	0.246171	0.000511264	0.00493764	0.00199182	0.606005	0.860697	0.000632301	0.00201911	0.074635	0.230746	5.59209e-05	0.00121212	1.80994e-05	0.000599909	0.00619505	0.113211	0.122129	0.255086
Acetoin	0.342524	0.792996	0.000318856	0.00336242	0.498468	0.819909	0.790531	0.00536308	0.0499396	0.000664826	0.00210855	0.00946337	0.0499027	0.509934	0.625741	0.212167	0.459837	0.616617	0.999311	0.640349	0.653998
Acetone	0.18304	0.189574	0.770438	0.865772	0.148677	0.33128	0.098925	0.550434	0.845296	0.0187514	0.0338753	0.37574	0.631623	0.00720219	0.0383509	0.020062	0.0959381	0.737108	1	0.00366983	0.0304791
Acetonitrile	0.00212819	0.0015711	0.0900237	0.321913	0.00121778	0.00207198	0.00142934	0.141479	0.457844	0.312526	0.303169	0.0656639	0.210614	0.443424	0.580049	0.516793	0.720513	0.828398	1	0.723158	0.663056
Anethole	0.0423495	0.0919231	0.705285	0.865772	0.0512902	0.156638	0.0741745	0.351864	0.725511	0.00892563	0.0186429	0.584629	0.716686	0.00245957	0.0171306	0.00186291	0.015412	0.888637	1	0.00674871	0.04309
Benzaldehyde	0.96498	0.822236	0.00402003	0.0286898	0.707155	1.14761	0.64357	0.0732401	0.309817	0.127219	0.153168	0.000221992	0.00241147	0.226395	0.403614	0.840123	0.77076	0.0346915	0.270976	0.144416	0.28122
Benzaldehyde, 3-bromo-5-methoxy-4-[(4-methylphenyl)methoxy]-	0.0051544	0.00305902	3.76644e-06	5.92028e-05	0.00271734	0.004124	0.00242431	0.000276724	0.00437736	0.000581361	0.0018776	1.09441e-05	0.000174945	0.444211	0.5806	0.812664	0.77076	0.287056	0.793841	0.259218	0.397763
Benzaldehyde, 3-chloro-5-methoxy-4-[(4-methylphenyl)methoxy]-	0.00179929	0.00877134	1.95938e-15	2.32481e-07	0.00780392	0.0106802	0.00789261	6.51803e-12	3.9498e-07	3.11661e-11	1.09273e-07	6.30713e-10	3.03042e-07	0.433134	0.572815	0.728837	0.77076	0.362218	0.869357	0.21106	0.351243
Benzaldehyde, 4-(1-phenyl-2-propenyloxy)-	0.00898752	0.0081524	0.483394	0.820816	0.0053518	0.0098738	0.0095536	0.685849	0.867776	0.337166	0.320105	0.739554	0.718028	0.667134	0.730678	0.439139	0.67325	0.894703	1	0.436967	0.550603
Benzaldehyde, 4-hydroxy-	0.00283146	0.00276637	0.206481	0.550125	0.00288724	0.00383424	0.00167741	0.947103	0.867776	0.0337991	0.0540758	0.336234	0.600224	0.166961	0.338435	0.0812605	0.256587	0.29406	0.801719	0.327142	0.460002
Benzene	0.134785	0.0865623	0.000532769	0.00523724	0.061081	0.103435	0.0973163	0.00108289	0.0138717	0.0678365	0.0936115	0.000314165	0.00322935	0.339492	0.503358	0.315011	0.57102	0.632912	1	0.775081	0.663056
Benzene, (2-isothiocyanatoethyl)-	0.0173963	0.00660878	0.00121103	0.010539	0.00841087	0.00585656	0.00550036	0.00687066	0.060319	0.0119174	0.0235535	0.00426156	0.0268709	0.809103	0.816104	0.631329	0.763181	0.870481	1	0.517794	0.60421
Benzene, 1-(chloromethyl)-3-methoxy-	0.000200008	0.00376175	3.72909e-07	6.6094e-06	0.00331397	0.0011644	0.00686411	0.0258853	0.157098	5.14119e-08	4.51204e-07	5.10425e-07	1.05895e-05	0.0211597	0.0849503	0.0329801	0.138196	0.0031955	0.08207	0.786122	0.663056
Benzene, 1-ethyl-4-methyl-	0.0270071	0.00674556	8.98986e-09	2.32481e-07	0.00562322	0.00756184	0.00713938	2.4698e-07	7.51956e-06	8.40343e-05	0.000343772	1.67612e-07	3.8047e-06	0.141142	0.305863	0.119645	0.327769	0.635645	1	0.0922513	0.21623
Benzeneacetic acid, methyl ester	0.100481	0.0754912	0.978197	0.865772	0.0610881	0.122648	0.0444532	0.0774546	0.320696	0.0445931	0.0672962	0.722773	0.718028	0.00245331	0.017098	0.00170302	0.0143962	0.105869	0.491758	0.0288636	0.105055
Benzoic acid, 3,4-dichlorophenyl ester	0.0125184	0.00634484	2.3284e-06	3.75558e-05	0.00654291	0.00760541	0.00490721	4.15931e-05	0.000833787	0.00404306	0.0097357	1.52326e-06	2.90093e-05	0.362614	0.521269	0.372841	0.622627	0.157446	0.603292	0.1183	0.250384
Benzyl alcohol	0.0531026	0.0630681	0.933255	0.865772	0.0472908	0.0889578	0.0551814	0.630132	0.864805	0.592135	0.457796	0.912943	0.718028	0.538078	0.644711	0.300155	0.556598	0.522978	0.974359	0.539145	0.615843
Benzyl methyl ketone	0.0269242	0.0565944	0.0211485	0.109306	0.0904455	0.0500379	0.0277511	0.36986	0.740713	0.0060963	0.0136593	0.0403215	0.147945	0.541313	0.646883	0.326613	0.581942	0.198055	0.67402	0.907182	0.663056
Bicyclo[2.2.1]hept-2-ene, 2-[(2,4-dinitrophenyl)thio]-	0.0186812	0.02039	0.660005	0.865772	0.020834	0.0314398	0.00347359	0.22989	0.594351	0.207413	0.223399	0.215606	0.46976	0.00627842	0.0346006	0.0137356	0.072054	0.630183	1	0.00401028	0.0320213
Bicyclo[4.1.0]heptane, 7-methylene-	0.000531197	0.0257191	1.26784e-09	2.32481e-07	0.013514	0.044225	0.00986923	0.000423677	0.00630263	1.27581e-12	1.09273e-07	6.23944e-06	0.000105341	0.000594619	0.00605607	0.00339186	0.0244156	0.879551	1	0.00032103	0.00872856
Bis[bicyclo[3.2.0]hept-2-en-4-yl]ether	0.0792891	0.055726	0.604817	0.861902	0.0450559	0.0955849	0.0148872	0.444841	0.794366	0.308177	0.300113	0.109655	0.302028	0.0462459	0.147532	0.181413	0.420363	0.60318	0.997615	0.00957275	0.05298
Butanal, 2-methyl-	0.0195545	0.0219476	0.459517	0.807683	0.018238	0.0286359	0.0193915	0.556163	0.847254	0.0992974	0.126213	0.63144	0.718028	0.569471	0.665742	0.247054	0.50074	0.338475	0.847535	0.189977	0.330018
Butanal, 3-methyl-	0.0449913	0.0499583	0.640962	0.865562	0.0417682	0.0662704	0.0427578	0.769366	0.867776	0.0885711	0.115403	0.356805	0.617221	0.312259	0.4814	0.578875	0.747982	0.513043	0.970028	0.095336	0.220502
Butanoic acid, 2-methyl-	1.26967	0.939853	0.501174	0.829514	0.724206	1.355	0.741951	0.573525	0.852674	0.0638181	0.0892262	0.736188	0.718028	0.0061629	0.0341218	0.00329601	0.0238804	0.131139	0.549961	0.0594161	0.165513
Butanoic acid, 3-methyl-	1.82381	1.08039	0.00386558	0.0277777	0.787953	1.52829	0.923727	3.58542e-05	0.000730576	0.646785	0.477883	0.00756923	0.0420249	0.00322382	0.0209755	0.00120152	0.0110678	0.0454263	0.312452	0.168405	0.30752
Butanoic acid, 3-methyl-, 3-methylbutyl ester	0.00556636	0.00227853	0.365264	0.738928	0.00161507	0.0038879	0.00147748	0.412393	0.773005	0.0187514	0.0338753	0.45211	0.678078	3.45947e-05	0.000889626	4.17868e-05	0.00104838	0.0462601	0.315491	0.00240771	0.0242193
Butanoic acid, 3-methyl-, propyl ester	0.0135157	0.0094199	0.0205636	0.106932	0.00838534	0.0127926	0.00741496	0.00267618	0.0289692	0.189904	0.208838	0.171405	0.406965	0.387064	0.539599	0.225538	0.475957	0.0614495	0.367302	0.82084	0.663056
Butanoic acid, 3-methylbutyl ester	0.0254628	0.00831963	0.00559194	0.0376198	0.00461478	0.0126306	0.00823389	0.000128778	0.00225633	0.45874	0.394365	0.0267226	0.109236	0.00186251	0.0139269	0.000530779	0.00606676	0.0306325	0.253913	0.247226	0.386387
Butanoic acid, butyl ester	0.369107	0.0460896	8.53288e-09	2.32481e-07	0.0182924	0.0335736	0.0888797	2.94342e-09	3.9498e-07	4.85571e-06	2.66096e-05	0.000221992	0.00241147	0.0221403	0.0877722	0.0130464	0.0692761	0.00816424	0.129806	0.946321	0.663056
Butanoic acid, propyl ester	0.438011	0.150328	0.303574	0.677884	0.125824	0.138117	0.189954	0.12596	0.428496	0.387571	0.352764	0.884691	0.718028	0.854167	0.831799	0.372841	0.622627	0.0524645	0.337421	0.410958	0.530645
Butyl 2-methylbutanoate	0.00423495	0.00200938	0.866283	0.865772	0.0014201	0.00293521	0.00178709	0.221691	0.583463	0.129508	0.155312	0.877649	0.718028	0.00361714	0.0228674	0.00139961	0.0124117	0.0903085	0.451835	0.0882744	0.210618
Butyric acid	12.5503	4.98061	5.7384e-12	2.32481e-07	3.93745	4.57404	6.55997	1.58457e-10	3.9498e-07	1.35569e-08	1.41793e-07	6.43348e-07	1.31083e-05	0.586979	0.677435	0.273579	0.529522	0.0377634	0.283335	0.366092	0.493859
Camphene	0.154173	0.28893	0.919248	0.865772	0.348403	0.325117	0.185674	0.293337	0.669162	0.360619	0.335632	0.787183	0.718028	0.842475	0.828964	0.34714	0.600561	0.46958	0.947632	0.218602	0.35869
Carbamic acid	0.000811175	0.00366577	0.000943699	0.00853246	0.00215155	0.00426863	0.00477982	0.492084	0.820625	5.5092e-05	0.000236115	0.000354137	0.00356974	0.00478442	0.0282132	0.0036952	0.0260891	0.00275063	0.0764375	0.640349	0.653998
Carbamic acid, (2,4-difluorophenyl)-, 5-methyl-2-(1-methylethyl)phenyl ester	9.30047e-05	0.00167864	1.3886e-06	2.29987e-05	0.00292012	0.000758073	0.00130982	0.00388805	0.0389166	5.35318e-07	3.6319e-06	3.62943e-05	0.000507395	0.300633	0.471695	0.685631	0.770398	0.356187	0.863979	0.471403	0.575145
Carbon dioxide	0.0752985	0.0988304	0.000681997	0.00647076	0.0894346	0.112953	0.0950121	0.144988	0.464207	0.000200572	0.000741626	0.00101439	0.00851284	0.0304781	0.110277	0.0142742	0.0741977	0.0239629	0.223604	0.276843	0.414267
Carbon disulfide	0.116159	0.0206598	0.303574	0.677884	0.0195033	0.0336385	0.00951448	0.259372	0.631086	0.115183	0.141742	0.839107	0.718028	0.450645	0.585093	0.670825	0.769333	0.103407	0.485668	0.178914	0.318594
Carbonic acid, prop-1-en-2-yl tetradecyl ester	0.0526346	0.0307359	0.0900237	0.321913	0.0302708	0.0364839	0.0257022	0.22989	0.594351	0.355849	0.33252	0.0323801	0.125921	0.457849	0.590102	0.708335	0.77076	0.348244	0.856726	0.249023	0.388101
cis-11-Hexadecenal	0.0021382	0.0011284	0.533104	0.842836	0.000823127	0.00173284	0.000894318	0.439756	0.7912	0.108003	0.134789	0.462916	0.683192	0.039435	0.132132	0.0162116	0.081726	0.0588343	0.358813	0.668638	0.659358
cis-9-Hexadecenal	0.00186942	0.0038148	1.11196e-06	1.86246e-05	0.00371586	0.002072	0.0057196	0.00204237	0.0233177	1.15774e-06	7.28071e-06	2.87138e-05	0.000412904	0.785898	0.804396	0.642513	0.7654	0.47194	0.948989	0.827192	0.663056
Copaene	0.0959949	0.0929849	0.320448	0.695968	0.100454	0.0912433	0.0869188	0.862373	0.867776	0.166415	0.188663	0.314293	0.580498	0.445323	0.581378	0.207893	0.454558	0.46958	0.947632	0.588743	0.638176
Cyclobutane, 1,2-diethenyl-3,4-dimethyl-	0.405089	0.573057	0.538912	0.844943	0.504647	0.642855	0.536052	0.998292	0.867776	0.0563702	0.0809319	0.657041	0.718028	0.208272	0.384965	0.266095	0.521587	0.671622	1	0.0853912	0.206471
Cycloheptasiloxane, tetradecamethyl-	0.0939559	0.0564457	0.00565279	0.0379543	0.0724971	0.0561123	0.0403494	0.00394127	0.0393327	0.434239	0.380638	0.00128383	0.0103108	0.115603	0.27028	0.142015	0.363791	0.668826	1	0.0573842	0.161982
Cyclohexane, 1,1'-methylenebis-	0.00131358	0.00453192	0.00952209	0.0579643	0.0041061	0.0066355	0.00306215	0.224945	0.587821	0.000215551	0.000790093	0.116762	0.315311	0.0530881	0.162143	0.0786856	0.251263	0.699824	1	0.0235882	0.0924583
Cyclohexanecarboxylic acid	0.805903	0.261349	0.000229503	0.00252505	0.203835	0.135723	0.451038	0.000538826	0.00772979	4.27343e-05	0.000188226	0.116762	0.315311	0.765616	0.793	0.749535	0.77076	0.100197	0.477601	0.461699	0.568465
Cyclohexanecarboxylic acid, ethyl ester	0.0595845	0.00865225	0.131007	0.414769	0.0064115	0.00177097	0.017948	0.10613	0.387762	0.116239	0.142755	0.578512	0.716052	0.48322	0.607571	0.360366	0.612087	0.256938	0.757665	0.884825	0.663056
Cyclohexanecarboxylic acid, methyl ester	0.082822	0.0274616	0.000182348	0.00206412	0.0274017	0.0142647	0.0405769	0.000201208	0.00332522	8.09019e-05	0.000332368	0.0862049	0.255479	0.173415	0.346122	0.830947	0.77076	0.0269883	0.237752	0.117047	0.24883
Cyclohexanemethanol	0.0095708	0.00812169	0.391017	0.760497	0.00944234	0.00414912	0.0106803	0.926676	0.867776	0.716991	0.497831	0.0964691	0.2764	0.21984	0.396978	0.880124	0.77076	0.117075	0.518503	0.763305	0.663056
Cyclohexanol, 4-ethenyl-4-methyl-3-(1-methylethenyl)-	0.0201756	0.017722	0.765051	0.865772	0.0185476	0.0208651	0.0142757	0.48939	0.81928	0.134184	0.15966	0.863595	0.718028	0.148777	0.315819	0.0547605	0.197243	0.312068	0.821127	0.405456	0.526285
Cyclohexanone, 2,2,6-trimethyl-	0.00343025	0.00376301	0.384237	0.755029	0.00450623	0.00452337	0.00226178	0.782484	0.867776	0.723816	0.499372	0.0224609	0.0959808	0.079467	0.212388	0.368654	0.619124	0.0698779	0.393624	0.0184664	0.0792699
Cyclohexasiloxane, dodecamethyl-	0.187744	0.0995285	0.0203718	0.10615	0.100486	0.117417	0.0811249	0.00714075	0.0621017	0.885796	0.511288	0.0029811	0.0202681	0.0533113	0.162607	0.0523523	0.191264	0.766221	1	0.0392553	0.127655
Cyclohexene, 1-methyl-4-(1-methylethylidene)-	0.0190952	0.0240488	0.762362	0.865772	0.0251074	0.0260889	0.0138512	0.998292	0.867776	0.229582	0.241284	0.606274	0.718028	0.569974	0.666078	0.220905	0.470437	0.527983	0.976426	0.148963	0.286332
Cyclohexene, 3-(1,5-dimethyl-4-hexenyl)-6-methylene-, [S-(R*,S*)]-	0.242486	0.178253	0.727673	0.865772	0.204865	0.224346	0.104425	0.323827	0.699887	0.177871	0.198598	0.223991	0.480677	0.0389667	0.131038	0.0585574	0.206442	0.843378	1	0.0199626	0.0832354
Cyclohexene, 4-ethenyl-4-methyl-3-(1-methylethenyl)-1-(1-methylethyl)-, (3R-trans)-	0.0155057	0.0101525	0.439438	0.795334	0.00756309	0.0149397	0.00812696	0.402699	0.766082	0.0265405	0.0446564	0.637801	0.718028	0.00792692	0.0412041	0.00562675	0.0361599	0.113532	0.510216	0.054771	0.157357
Cyclopentanecarboxylic acid, 4-nitrophenyl ester	0.00283731	0.00595144	0.00577629	0.0386308	0.00823127	0.00712581	0.00256851	0.0833792	0.335497	0.000183222	0.000684878	0.142682	0.360946	0.0847389	0.221507	0.240644	0.493498	0.608539	0.998372	0.0204852	0.0845974
Cyclopentasiloxane, decamethyl-	0.142887	0.154754	0.125261	0.40273	0.143269	0.144149	0.177967	0.0273471	0.163108	0.585847	0.455253	0.0282905	0.113956	0.111589	0.26433	0.0812605	0.256587	0.955638	1	0.0853912	0.206471
Cyclopropane, 1-methyl-1-(1-methylethyl)-2-nonyl-	0.0363776	0.03943	0.602358	0.861504	0.0373025	0.059616	0.0226257	0.812222	0.867776	0.028134	0.0467688	0.521949	0.704932	0.0325154	0.115432	0.0566307	0.201808	0.734217	1	0.0159856	0.0724543
Cyclotrisiloxane, hexamethyl-	0.0277992	0.0268781	0.212239	0.55898	0.0277789	0.0287328	0.0243405	0.0629113	0.281771	0.601624	0.461546	0.0991823	0.281783	0.228689	0.405908	0.100397	0.29381	0.849386	1	0.249598	0.388647
Decane, 2,2,3-trimethyl-	0.0275167	0.0399186	0.685739	0.865772	0.027947	0.0653565	0.0279487	0.977804	0.867776	0.0569619	0.0815993	0.352166	0.613513	0.0618159	0.179731	0.183166	0.422711	0.444056	0.931955	0.0194521	0.0818936
Decane, 2,4,6-trimethyl-	0.0418831	0.04997	1.43766e-07	2.69329e-06	0.0316106	0.0719538	0.0488995	0.193913	0.544161	1.5942e-09	1.09273e-07	1.63111e-09	3.03042e-07	2.30752e-07	2.98283e-05	1.74995e-06	0.00012307	1.76834e-06	0.000764011	0.221673	0.361702
Di(1,2,5-oxadiazolo)[3,4-b:3,4-E]pyrazine, 4,8-diacetyl-	0.000845428	0.000390258	0.867671	0.865772	0.000347063	0.000597546	0.000227447	0.129169	0.434733	0.100236	0.127146	0.55734	0.713	0.000780503	0.00736301	0.000841204	0.00849182	0.194073	0.667622	0.0052155	0.03714
Dichloroacetic acid, 4-hexadecyl ester	0.00566477	0.00790243	0.908059	0.865772	0.00594802	0.0093579	0.0087699	0.114723	0.405901	0.0787989	0.105294	0.676512	0.718028	0.000602781	0.00611537	0.000474071	0.005592	0.0519994	0.335816	0.0197058	0.082562
Dichloroacetic acid, nonyl ester	0.00109294	0.00117331	0.0121994	0.0707225	0.00116594	0.0018394	0.000566093	0.608999	0.861294	0.000122333	0.000479515	0.0552925	0.186128	0.00225024	0.0160306	0.00257721	0.0197552	0.152987	0.594714	0.0106838	0.0565996
Dimethyl sulfone	0.149806	0.402482	0.842767	0.865772	0.707957	0.291654	0.196897	0.345262	0.719693	0.06125	0.0863916	0.14147	0.358904	0.0490721	0.153663	0.0952768	0.284225	0.608539	0.998372	0.0207512	0.0852861
Dimethyl trisulfide	0.0982042	0.489665	0.00504265	0.0345658	0.566277	0.694568	0.221256	0.12596	0.428496	0.000186575	0.000695898	0.0973668	0.278188	0.144996	0.310924	0.0993543	0.291878	0.970927	1	0.109768	0.239641
Disiloxane, hexamethyl-	0.0330961	0.0334521	0.0864063	0.312838	0.0357446	0.0376318	0.0257506	0.0864763	0.34302	0.439617	0.383705	0.0683243	0.216678	0.538787	0.645187	0.381305	0.629595	0.967868	1	0.29339	0.429537
Disulfide, methyl 2-propenyl	1.69569e-08	0.008255	2.94351e-05	0.000402106	0.0169671	0.00370508	0.00351232	0.134657	0.445192	4.8681e-07	3.33447e-06	0.000116574	0.00139482	0.0105143	0.0508622	0.00456722	0.0307488	0.0277943	0.241403	0.537279	0.614873
Dodecane	0.0391343	0.0753432	0.00246002	0.0190978	0.0633997	0.116557	0.0482818	0.0912955	0.354453	8.36854e-07	5.43186e-06	0.37334	0.629862	0.000350689	0.00416942	0.00277179	0.020893	0.395456	0.897073	0.00027474	0.00810066
E-2-Hexadecacen-1-ol	0.0117249	0.0108569	0.719743	0.865772	0.00999079	0.0159166	0.00715342	0.386066	0.753608	0.03698	0.0580578	0.818239	0.718028	0.00781894	0.0407836	0.00681642	0.0419713	0.35419	0.862174	0.0179909	0.0779876
Ethane, 1-ethoxy-1-methoxy-	3.68537e-05	0.00178927	1.18356e-06	1.97615e-05	0.000508235	0.00286425	0.00214604	0.553295	0.846284	1.60822e-10	1.09273e-07	1.59703e-07	3.64006e-06	9.67662e-09	2.32274e-06	1.8036e-08	4.37807e-06	1.4324e-06	0.000628455	0.237488	0.377056
Ethanol	0.860324	1.31741	0.274713	0.644337	1.87177	0.530093	1.50601	0.190992	0.539795	0.720401	0.49861	0.25238	0.515463	0.753642	0.78591	0.489323	0.705351	0.870481	1	0.558182	0.625212
Ethanol, 1-(2-butoxyethoxy)-	0.0168629	0.00775774	4.02891e-08	8.2576e-07	0.00901853	0.00721333	0.00594465	0.000372097	0.00564205	4.07728e-06	2.27221e-05	3.4137e-09	3.03042e-07	0.232766	0.409951	0.849321	0.77076	0.108376	0.49788	0.0427118	0.134641
Ethanol, 2-ethoxy-	0.000335919	0.000795398	7.30231e-05	0.000916037	0.000950801	0.000595081	0.000848209	0.0172179	0.118255	2.87223e-05	0.000131911	0.00103058	0.0086235	0.226767	0.403987	0.749942	0.77076	0.46958	0.947632	0.769176	0.663056
Ethanone, 1-(2-aminophenyl)-	0.00460889	0.015623	0.534263	0.843264	0.0349572	0.00846924	0.00260375	0.688999	0.867776	0.0827584	0.109422	0.807853	0.718028	0.206673	0.383273	0.110221	0.311527	0.43272	0.924409	0.259278	0.39782
Ethyl Acetate	0.728735	0.362758	0.00113128	0.00994927	0.365779	0.413391	0.318502	0.0128092	0.0956762	0.00188793	0.00514588	0.0140293	0.0673669	0.446829	0.582431	0.344146	0.5979	0.922069	1	0.214054	0.354208
Ethyl methyl disulfide	0.00189796	0.000318917	0.00427409	0.030175	0.000321603	0.000262674	0.000356322	0.00118538	0.0149491	0.127219	0.153168	0.0164623	0.0760218	0.314109	0.482925	0.197715	0.44173	0.238122	0.732974	0.446121	0.557349
Ethyl propionate	0.128254	0.0521015	4.27735e-08	8.72548e-07	0.034516	0.0547905	0.0691547	1.45294e-07	4.58742e-06	3.31859e-07	2.36371e-06	0.0013874	0.0109798	0.742547	0.779158	0.849321	0.77076	0.0675425	0.386481	0.642599	0.654511
Ethylbenzene	0.323522	0.205271	3.56947e-05	0.00047953	0.185636	0.230844	0.199108	1.35525e-05	0.000304994	0.0268528	0.0450726	0.000134798	0.00157914	0.483486	0.607753	0.192148	0.434551	0.722689	1	0.532837	0.612528
Eucalyptol	0.0394258	0.0480976	0.728997	0.865772	0.107433	0.00313156	0.0292132	0.115711	0.407937	0.367851	0.340303	0.790618	0.718028	0.00137179	0.011109	0.000685347	0.00730554	0.0454263	0.312452	0.0666575	0.177668
Furan, 2-pentyl-	0.0354043	0.0322018	0.0642516	0.253354	0.0282919	0.0343684	0.0345205	0.0119129	0.0907661	0.737531	0.50223	0.091221	0.265816	0.171442	0.343789	0.0456832	0.174067	0.763294	1	0.345445	0.476103
Heptacosane	8.37292e-05	0.00486354	6.10978e-05	0.00078039	0.00511653	0.00672838	0.00291857	0.0301584	0.174309	7.31549e-06	3.85315e-05	0.000851182	0.00737557	0.779655	0.800984	0.312571	0.568685	0.372412	0.878201	0.255788	0.394522
Heptanal	0.0131214	0.0117116	0.225448	0.578622	0.00947687	0.0131136	0.0126471	0.818869	0.867776	0.0749948	0.101284	0.318604	0.584506	0.0323316	0.114972	0.0177072	0.0873571	0.0246902	0.227074	0.217078	0.357191
Heptane, 2,2,4,6,6-pentamethyl-	0.0311978	0.0283162	0.527328	0.840644	0.0221597	0.0448371	0.0192467	0.556163	0.847254	0.604803	0.462778	0.146366	0.367101	0.617446	0.69774	0.268463	0.524113	0.35419	0.862174	0.197671	0.33784
Heptanoic acid	0.922782	0.422125	0.625896	0.864543	0.1019	0.997337	0.212289	0.0849164	0.339248	0.00233855	0.00616353	0.944857	0.718028	1.32165e-06	0.000107742	1.48248e-06	0.000109621	0.0506246	0.331038	0.000394316	0.00964155
Heptasiloxane, hexadecamethyl-	0.0138365	0.00544382	6.92052e-09	2.32481e-07	0.00584157	0.00556689	0.0049107	1.07453e-06	2.96421e-05	0.000170368	0.000642378	4.2372e-09	3.03042e-07	0.319274	0.487155	0.3284	0.583599	0.131139	0.549961	0.122129	0.255086
Hexadecanal	0.232317	0.163906	0.719743	0.865772	0.148279	0.175148	0.171379	0.50841	0.828391	0.624028	0.469969	0.48775	0.693607	0.246158	0.422933	0.766717	0.77076	0.949527	1	0.695487	0.662265
Hexadecane	0.0386244	0.0581805	0.6754	0.865772	0.0512636	0.0883358	0.0367485	0.720785	0.867776	0.0018024	0.00494803	0.0862049	0.255479	0.000235828	0.00316664	0.0036952	0.0260891	0.223202	0.712106	0.000161983	0.00631859
Hexanal	0.0393046	0.0255204	1.5575e-06	2.56464e-05	0.0233525	0.0291588	0.023974	2.22383e-06	5.82494e-05	0.00653296	0.0144558	3.66254e-06	6.48646e-05	0.4576	0.589929	0.378292	0.627132	0.674422	1	0.242538	0.381906
Hexanoic acid	0.955014	0.102048	0.000209703	0.00233338	0.0754734	0.160903	0.0745194	0.000254618	0.0040747	0.0211754	0.0373218	0.00118743	0.00967768	0.26271	0.438389	0.543466	0.733507	0.479059	0.952985	0.338636	0.470151
Hexanoic acid, butyl ester	0.00853529	0.00709706	0.382313	0.753451	0.00199228	0.0167846	0.00326415	0.293337	0.669162	0.00892563	0.0186429	0.507551	0.700588	4.20434e-06	0.000233055	3.10384e-06	0.000182828	0.0306325	0.253913	0.00194124	0.0215935
Hexanoic acid, methyl ester	0.366783	0.176538	0.0155235	0.0856802	0.0490288	0.454648	0.0452974	9.90162e-05	0.00179303	0.592135	0.457796	0.0107655	0.0550765	0.000345192	0.00412363	0.000157716	0.00257794	0.0289011	0.246344	0.0492744	0.147299
Hordenine	0.000269888	0.0010317	0.00101117	0.00904721	0.00093189	0.00131958	0.000885829	0.363046	0.735068	8.13885e-06	4.2425e-05	0.0045075	0.02808	0.00654048	0.0356784	0.00385615	0.0269653	0.0583225	0.357132	0.114576	0.245741
Indole	14.707	22.1633	0.0180169	0.0963833	20.8524	26.4701	18.9675	0.358547	0.731266	0.00133834	0.00384301	0.0929443	0.269317	0.180368	0.354218	0.0857169	0.265612	0.488642	0.958133	0.249598	0.388647
Indolizine, 3-methyl-	0.716556	1.19252	0.0807408	0.29829	1.17132	2.02092	0.439385	0.468132	0.80802	0.000880463	0.00268586	0.72947	0.718028	0.00356004	0.022596	0.0107342	0.0596447	0.909893	1	0.00200227	0.0219504
Isobutyl isovalerate	0.0637258	0.0131538	0.000158374	0.00182333	0.0050117	0.0126847	0.0225532	1.5232e-05	0.000338961	0.0312106	0.0507739	0.00444484	0.0277735	0.0441864	0.142972	0.0100512	0.0566983	0.100992	0.479612	0.867841	0.663056
Isopentanol	0.0508442	0.0798734	0.0681547	0.264367	0.0579718	0.124039	0.0594224	0.231556	0.596525	0.00156672	0.00439395	0.959073	0.718028	0.0179155	0.0752918	0.0993543	0.291878	0.229087	0.720482	0.00714159	0.0445379
Isophthalic acid, butyl tridec-2-ynyl ester	0.0044813	0.0915118	3.97922e-07	7.02802e-06	0.0993567	0.141925	0.0367602	0.00146035	0.0177477	6.77214e-10	1.09273e-07	0.000893092	0.0076716	0.00676258	0.036583	0.033769	0.140564	0.79271	1	0.0017962	0.0207267
Isopropyl Alcohol	0.0127236	0.0185396	0.212239	0.55898	0.0110359	0.0313236	0.0142484	0.497494	0.823273	0.000562077	0.00182355	0.722773	0.718028	0.00113754	0.00968255	0.000556993	0.00628216	0.334617	0.843821	0.0111301	0.058019
Linalool	0.190584	0.0871909	0.173186	0.495137	0.100786	0.0586129	0.101559	0.285543	0.660798	0.0772588	0.103676	0.590777	0.71721	0.538881	0.64525	0.642513	0.7654	0.58196	0.993592	0.244033	0.383337
Linalyl acetate	0.0220774	0.0169997	0.280173	0.650947	0.0211552	0.0223887	0.00235434	0.733639	0.867776	0.0227573	0.0395234	0.499013	0.697722	0.00602815	0.0335604	0.00510681	0.0335353	0.200742	0.678279	0.0232895	0.0917173
Mequinol	0.00399114	0.0348433	1.20916e-07	2.29034e-06	0.041638	0.0247073	0.0383214	7.63687e-06	0.000181128	0.000543389	0.0017709	2.03204e-07	4.53884e-06	0.396975	0.546876	0.89856	0.77076	0.302975	0.811476	0.142927	0.279532
Mesitylene	0.0248352	0.00812283	3.30937e-11	2.32481e-07	0.00770535	0.00819411	0.00847372	3.10096e-09	3.9498e-07	1.18437e-07	9.4252e-07	1.31528e-07	3.04827e-06	0.944089	0.83339	0.791463	0.77076	0.819439	1	0.770476	0.663056
Methanesulfonic anhydride	0.0378728	0.0304884	0.0692278	0.267352	0.025631	0.0327365	0.034277	0.0258853	0.157098	0.442321	0.385236	0.188794	0.432761	0.541756	0.64718	0.270956	0.526757	0.104223	0.487694	0.622936	0.649527
Methanethiol	0.017149	0.0852135	0.104217	0.356025	0.180065	0.0490388	0.0222435	0.967564	0.867776	0.000955274	0.00288063	0.423138	0.662604	0.0103484	0.0502648	0.00503628	0.0331749	0.399737	0.900411	0.0392553	0.127655
Methyl 3-phenylpropanoate	0.0554099	0.0181897	0.000325403	0.00342224	0.0204561	0.0202026	0.0137942	9.39021e-05	0.00171156	0.00941374	0.0194658	0.0123796	0.0612641	0.471638	0.599626	0.447437	0.678937	0.0450142	0.310941	0.798702	0.663056
Methyl acetate	0.164815	0.0674082	8.22973e-11	2.32481e-07	0.0555774	0.0793534	0.0648423	3.54449e-10	3.9498e-07	5.53094e-06	2.9932e-05	3.26505e-08	8.64052e-07	0.233514	0.410688	0.169539	0.404103	0.0340386	0.26829	0.767358	0.663056
Methyl Alcohol	0.533491	0.404287	0.00142932	0.0121199	0.334178	0.550982	0.316711	7.18616e-05	0.00135283	0.353478	0.330965	0.00120616	0.00980151	0.118087	0.273911	0.0579088	0.204889	0.131139	0.549961	0.515363	0.602813
Methyl butyrate	0.912197	0.231897	1.38899e-11	2.32481e-07	0.187753	0.253089	0.26058	3.20778e-11	3.9498e-07	9.84789e-07	6.2912e-06	1.71707e-07	3.88972e-06	0.0755688	0.20547	0.122107	0.331901	0.00711874	0.121266	0.786122	0.663056
Methyl hexadecanoic acid	0.0832332	0.0403924	1.21284e-05	0.000177371	0.028015	0.0561698	0.0378523	1.43348e-08	5.46351e-07	0.158193	0.181417	0.000158498	0.00181272	0.000131666	0.0021318	0.000121726	0.00215801	0.0048348	0.100238	0.068977	0.181429
Methyl isobutyrate	0.00963524	0.00554157	0.0102277	0.0613986	0.00304887	0.01064	0.0029913	0.000315869	0.00490397	0.737531	0.50223	0.00910113	0.0484307	0.00136525	0.01107	0.000777679	0.00801477	0.0363707	0.277786	0.0697658	0.182694
Methyl propionate	0.164253	0.0450793	6.18081e-12	2.32481e-07	0.0379462	0.0518006	0.0458287	1.95334e-11	3.9498e-07	4.64174e-07	3.19473e-06	7.85562e-08	1.90667e-06	0.0620304	0.18015	0.0572666	0.203345	0.0104431	0.146781	0.859116	0.663056
Methyl salicylate	0.0233637	0.0330698	0.00932861	0.0570129	0.0491315	0.0191452	0.0305722	0.283616	0.658698	0.00105281	0.0031309	0.0323801	0.125921	0.239561	0.416594	0.0972969	0.288037	0.288796	0.795816	0.555338	0.623874
Methyl tetradecanoate	0.0652882	0.0210444	0.000109175	0.00131181	0.0165583	0.0296553	0.0171595	2.15437e-05	0.000463181	0.058768	0.0836272	0.000433917	0.00422868	0.0229922	0.0901901	0.0122294	0.0659299	0.315755	0.824956	0.0697658	0.182694
Methyl valerate	0.502364	0.2815	6.98507e-05	0.00088024	0.15633	0.320962	0.377511	3.59547e-06	9.07863e-05	0.0529265	0.0770163	0.00098271	0.00829526	0.057055	0.170272	0.0247251	0.112039	0.0356909	0.275045	0.320424	0.454015
Methylamine, N,N-dimethyl-	1.69569e-08	0.0373658	3.98055e-10	2.32481e-07	0.0886847	0.0141466	0.00673114	2.04362e-06	5.38634e-05	1.94159e-09	1.09273e-07	1.90229e-06	3.55868e-05	0.231196	0.4084	0.582068	0.749124	0.408381	0.906994	0.298417	0.434134
Myrcene	0.16823	0.11126	0.518152	0.836965	0.120153	0.101551	0.0597104	0.287478	0.662895	0.817893	0.511288	0.349861	0.611643	0.253721	0.430072	0.755503	0.77076	0.952582	1	0.751665	0.663056
Naphthalene, 1,2,3,5,6,7,8,8a-octahydro-1,8a-dimethyl-7-(1-methylethenyl)-	0.126284	0.0629541	0.202706	0.544219	0.0534917	0.0957772	0.040132	0.0980543	0.369964	0.515865	0.423908	0.02703	0.110168	0.0195139	0.0801154	0.12976	0.344467	0.558513	0.987317	0.00320917	0.028306
n-Hexane	0.000504058	0.0101233	3.40863e-05	0.000459788	0.0102424	0.0116811	0.00876447	0.00291091	0.0309747	1.91278e-06	1.1461e-05	0.00830363	0.0451342	0.323562	0.490638	0.518051	0.721164	0.649387	1	0.0974422	0.223379
Nonanal	0.0365393	0.0396222	0.723704	0.865772	0.0293168	0.0497543	0.0408949	0.012504	0.0940182	0.14518	0.169739	0.787183	0.718028	0.00214758	0.0154825	0.000938376	0.0092066	0.00634108	0.114521	0.20082	0.341016
n-Pentadecanol	0.639852	0.546511	0.500053	0.828992	0.523104	0.559706	0.570573	0.414838	0.774711	0.71019	0.496219	0.756461	0.718028	0.878968	0.83339	0.653778	0.767259	0.680036	1	0.894498	0.663056
Octadecane	0.151877	0.14478	0.212239	0.55898	0.163903	0.174835	0.0992206	0.175502	0.515839	0.45874	0.394365	0.0255228	0.105571	0.131693	0.293128	0.283433	0.539759	0.510574	0.968905	0.0422019	0.133625
Octadecanol	0.0111472	0.0222389	0.000308217	0.0032648	0.0212734	0.0312793	0.0149699	0.0380946	0.203789	2.44969e-06	1.43343e-05	0.0181373	0.0817745	0.0248634	0.0953984	0.0292786	0.126795	0.992348	1	0.0184664	0.0792699
Octanal	0.0244067	0.014132	0.0132079	0.0753535	0.0107648	0.020782	0.0114224	0.000574126	0.0081559	0.402776	0.362094	0.000824263	0.00718385	0.000120544	0.00200952	0.00017778	0.00280022	0.597842	0.996756	0.000631468	0.0121531
Octane	0.00402976	0.00436137	0.443623	0.798007	0.00390732	0.00539235	0.00390206	0.301273	0.67746	0.385071	0.351207	0.0920794	0.267563	0.45645	0.589131	0.485644	0.703188	0.663249	1	0.191876	0.331958
Octane, 2,4,6-trimethyl-	0.0901479	0.116193	0.445723	0.79933	0.132963	0.153356	0.0611363	0.906297	0.867776	0.165022	0.187443	0.000293262	0.00304821	0.000211099	0.00293498	0.867208	0.77076	0.00152026	0.0581904	8.74781e-05	0.0047838
Octane, 6-ethyl-2-methyl-	0.00760908	0.0115171	0.000357656	0.00371434	0.00937293	0.0151638	0.0104183	0.105207	0.385767	3.30374e-05	0.000149528	0.00126399	0.0101814	0.0370371	0.126477	0.0114595	0.0627207	0.0766437	0.413716	0.695487	0.662265
o-Cymene	0.30284	0.549575	0.743619	0.865772	1.10555	0.368468	0.131983	0.75306	0.867776	0.058768	0.0836272	0.441447	0.672683	0.0882983	0.227519	0.12976	0.344467	0.777962	1	0.036942	0.122842
Oxime-, methoxy-phenyl-_	0.405	0.581881	6.49754e-09	2.32481e-07	0.484558	0.605872	0.656488	0.000191224	0.00318187	2.48131e-07	1.82182e-06	2.94889e-08	7.88824e-07	0.11638	0.271419	0.318127	0.573982	0.00703729	0.120576	0.525749	0.60868
p-Cresol	5.43897	8.61524	0.00384396	0.0276495	7.70738	11.8147	6.38005	0.202873	0.557266	6.55551e-05	0.000275671	0.0593847	0.195958	0.0053629	0.0307392	0.00402358	0.0278686	0.510574	0.968905	0.0138123	0.0661972
Pentadecanal	0.141315	0.0077416	8.3234e-23	2.32481e-07	0.00685543	0.00827798	0.00837056	3.2079e-17	3.9498e-07	3.12518e-16	1.09273e-07	5.08889e-15	3.03042e-07	0.0932069	0.235629	0.0318277	0.134699	0.105869	0.491758	0.887349	0.663056
Pentadecane	0.0410239	0.0417223	0.667685	0.865772	0.044656	0.055414	0.0257342	0.0512113	0.24719	0.0441113	0.0667224	0.299507	0.56625	0.000901786	0.00817472	0.000741761	0.00774123	0.266724	0.769848	0.00628566	0.0413466
Pentadecane, 2,6,10,14-tetramethyl-	0.00352425	0.00888991	0.00477359	0.0330452	0.00932197	0.00538076	0.0119117	0.762831	0.867776	2.12097e-05	0.000100497	0.0136846	0.0661087	0.000193252	0.00276317	0.000166036	0.00267101	0.0154061	0.178505	0.028505	0.104226
Pentanal, 2,4-dimethyl-	0.00165957	0.00743742	4.56983e-14	2.32481e-07	0.0055073	0.0111018	0.00561497	3.2667e-09	3.9498e-07	1.6202e-11	1.09273e-07	1.30698e-09	3.03042e-07	0.259385	0.435334	0.772372	0.77076	0.934263	1	0.769176	0.663056
Phenol	0.381092	1.16371	5.93587e-06	9.08947e-05	1.77252	0.661969	0.983424	0.000242161	0.00390231	0.0404125	0.0622705	4.42362e-08	1.13476e-06	0.0880985	0.227184	0.696043	0.770727	0.127266	0.541519	0.0278	0.102585
Phenol, 4-ethyl-	0.244586	0.128474	0.327367	0.703071	0.0846647	0.159224	0.146722	0.0401275	0.210905	0.453229	0.391332	0.267478	0.532651	0.00543561	0.0310518	0.00191925	0.0157656	0.280165	0.785901	0.0481218	0.14513
Phenylacetaldehyde	0.377786	0.526663	0.0110351	0.0652625	0.45921	0.628228	0.502266	0.0554336	0.260058	0.00530097	0.0121774	0.106716	0.296429	0.377541	0.532528	0.258429	0.513309	0.879551	1	0.20082	0.341016
Phenylethyl Alcohol	0.354257	0.446856	0.0301741	0.143983	0.376771	0.663708	0.304765	0.1118	0.399818	0.00381556	0.00927894	0.425726	0.664091	0.117976	0.273748	0.440094	0.673912	0.261799	0.763771	0.0373947	0.123793
Phthalic acid, hexyl tridec-2-yn-1-yl ester	0.115217	0.101786	0.0733763	0.278724	0.0799973	0.135514	0.0813275	0.0199984	0.131398	0.747872	0.504163	0.00767045	0.042458	0.049071	0.153661	0.0547605	0.197243	0.876526	1	0.0314893	0.111018
Pivalic acid, 2-methylpropyl ester	0.0128517	0.00984259	0.000431324	0.0043668	0.00969167	0.0122618	0.00768793	0.0285674	0.168025	0.000117866	0.000463993	0.00635817	0.0367205	0.796607	0.810009	0.378292	0.627132	0.795668	1	0.647743	0.655627
Propanoic acid, 2-methyl-	0.363613	0.218034	0.0229908	0.116671	0.170363	0.282773	0.201012	0.000547457	0.00783443	0.932777	0.511288	0.030276	0.119824	0.00498706	0.0291063	0.00191925	0.0157656	0.0753753	0.410015	0.130111	0.264672
Propanoic acid, 2-methyl-, anhydride	0.0536664	0.0298006	0.000463965	0.00465013	0.037789	0.0191907	0.0323353	0.0361499	0.196827	1.95648e-06	1.16975e-05	0.0676511	0.215151	0.0127861	0.0587918	0.0168379	0.0841022	0.725565	1	0.0114371	0.0589847
Propanoic acid, butyl ester	0.0236996	0.0414821	0.549446	0.848515	0.0232674	0.09321	0.0112794	0.414838	0.774711	0.431564	0.379102	0.155244	0.381621	0.177794	0.351242	0.25426	0.508744	0.816458	1	0.0615116	0.169098
Propanoic acid, propyl ester	0.134454	0.0566406	1.69147e-07	3.13707e-06	0.0485947	0.069118	0.0544665	2.79572e-08	1.00252e-06	1.76437e-05	8.5177e-05	0.0022884	0.0164206	0.129528	0.290142	0.539163	0.73153	0.00825728	0.13054	0.264422	0.402662
Propionic acid	2.00683	0.301425	1.67159e-21	2.32481e-07	0.208033	0.245438	0.445659	1.84847e-17	3.9498e-07	1.5006e-15	1.09273e-07	3.33101e-13	3.03042e-07	0.596465	0.683763	0.247374	0.501097	0.140186	0.569065	0.608584	0.645175
Propyl 2-methylpropanoate	0.00377922	0.00179073	0.000955647	0.00862406	0.0010873	0.00190955	0.00246747	4.08308e-05	0.000820186	0.0301544	0.0494093	0.0630895	0.204665	0.00412465	0.0252369	0.00189089	0.0155878	0.00413451	0.0928911	0.666842	0.659087
Quinoline	0.000926744	0.0447361	4.03158e-13	2.32481e-07	0.0413882	0.0344582	0.0532559	9.52962e-08	3.10078e-06	1.27106e-09	1.09273e-07	4.85739e-11	3.03042e-07	0.382718	0.536382	0.889402	0.77076	0.268379	0.771866	0.20082	0.341016
R(-)3,7-Dimethyl-1,6-octadiene	0.0529824	0.00464302	0.0622466	0.247598	0.00298265	0.00811371	0.00300118	0.769366	0.867776	0.00315422	0.00791923	0.167251	0.400581	0.0207896	0.0838741	0.0154096	0.078643	0.297605	0.805634	0.0453448	0.139811
S-Methyl 3-methylbutanethioate	0.0831975	0.0500729	0.282535	0.653768	0.030692	0.0560969	0.0642471	0.017419	0.119231	0.803752	0.510813	0.581567	0.716382	0.0264473	0.0997036	0.00700416	0.0428662	0.0614495	0.367302	0.84233	0.663056
Styrene	0.491656	0.52003	0.752972	0.865772	0.473328	0.625708	0.466147	0.1118	0.399818	0.291183	0.287973	0.776902	0.718028	0.139329	0.303456	0.0472752	0.178263	0.191452	0.663351	0.663366	0.658538
Sulcatone	0.0748698	0.125178	0.391992	0.76127	0.126229	0.17965	0.073955	0.740095	0.867776	0.0128745	0.025065	0.660271	0.718028	0.0826627	0.217947	0.25894	0.513866	0.444056	0.931955	0.0227023	0.0902514
Terpinene	0.0985375	0.0436833	0.141196	0.435425	0.0568175	0.0633654	0.00994434	0.879224	0.867776	0.011024	0.0221184	0.370949	0.62809	0.0556062	0.16733	0.0411903	0.161892	0.366275	0.872913	0.0755141	0.191716
Tetradecanal	0.0374191	0.0514121	0.488914	0.823614	0.0609773	0.0557368	0.0373823	0.772639	0.867776	0.0491329	0.0726368	0.581567	0.716382	0.192279	0.367669	0.518051	0.721164	0.304779	0.813415	0.0658998	0.176426
Tetrahydropyran Z-10-dodecenoate	1.69569e-08	0.0160019	4.52894e-07	7.94379e-06	0.013135	0.0219623	0.0131691	0.00291091	0.0309747	8.82746e-09	1.09273e-07	0.000147518	0.0017053	0.0965951	0.241111	0.0632809	0.217524	0.543141	0.982207	0.102887	0.230679
Thiophene, 2-pentyl-	0.0512224	0.0498679	0.0893571	0.320253	0.0440328	0.0631784	0.0434203	0.00780837	0.0664206	0.683217	0.489124	0.0541674	0.183385	0.0965698	0.241071	0.035816	0.146613	0.448637	0.934904	0.222358	0.362373
Toluene	0.910395	0.366546	5.37397e-09	2.32481e-07	0.300632	0.440226	0.363399	2.3541e-08	8.5699e-07	0.000534264	0.00174509	4.42362e-08	1.13476e-06	0.653283	0.72153	0.534887	0.729519	0.828398	1	0.306806	0.44176
trans-2-Dodecen-1-ol	0.139264	0.0455555	0.0112032	0.0660588	0.0518837	0.0313641	0.0537296	0.0202277	0.13245	0.028134	0.0467688	0.0821972	0.247058	0.812007	0.817438	0.797505	0.77076	0.608539	0.998372	0.56644	0.628971
trans-Raphasatin	0.00768012	0.00545575	0.332619	0.708345	0.00667492	0.00507508	0.00469049	0.991462	0.867776	0.0417675	0.0639115	0.689614	0.718028	0.159839	0.329752	0.181413	0.420363	0.825409	1	0.0674229	0.178915
Tributyl phosphate	0.12158	0.177993	2.49459e-07	4.52155e-06	0.145885	0.207442	0.184925	7.44879e-05	0.00139629	0.000111454	0.00044158	5.3469e-07	1.10527e-05	0.953338	0.83339	0.642513	0.7654	0.0578144	0.355457	0.287802	0.424404
Vinyl crotonate	0.0972246	0.172001	0.334381	0.710093	0.267926	0.167329	0.0766054	0.205926	0.561635	0.173508	0.194836	0.0135151	0.0654868	0.0111056	0.0529704	0.0993543	0.291878	0.260172	0.761739	0.00297709	0.0271673
Z-1,6-Tridecadiene	0.00315807	0.0388259	1.34241e-10	2.32481e-07	0.0525423	0.0279707	0.0337588	9.05613e-12	3.9498e-07	2.03624e-05	9.68837e-05	2.64525e-06	4.81625e-05	0.56685	0.663989	0.34714	0.600561	0.0766437	0.413716	0.94957	0.663056
Z-8-Hexadecene	0.00529137	0.00914071	0.342388	0.71789	0.00947118	0.0150378	0.00331249	0.363046	0.735068	0.00259902	0.00673507	0.742926	0.718028	0.000216963	0.00299055	0.000229233	0.00334148	0.0832492	0.43253	0.00492182	0.035935
*Note: GN, glomerulonephritis; DN, diabetic nephropathy; ON, other nephropathy.

## Sheet: ST7
Supplementary Table 7| Description of the metabolite clusters of 255 annotated metabolites in faecal metabolome.
Cluster ID	Cluster name	Number of metabolites	Representative metabolite	Min rho	Average rho	Containning metabolites
F01	F01: Alkanone compounds	7	2-Tridecanone	0.6228	0.7418	2-Nonanone; 2-Octanone; 2-Dodecanone; 2-Tridecanone; 2-Pentadecanone; 2-Undecanone; 2-Tetradecanone
F02	F02: Butanoic acid derivatives	5	2-Methylpropyl butanoate	0.6276	0.6986	Isobutyl isovalerate; 2-Methylpropyl butanoate; Butyl 2-methylbutanoate; S-Methyl 3-methylbutanethioate; Butanoic acid, 3-methylbutyl ester
F03	F03: Alkanol compounds	4	1-Hexadecanol	0.7148	0.8519	1-Hexadecanol; Octadecanol; n-Pentadecanol; 1-Hexadecyne
F04	F04: Cyclohexasiloxane and its derivatives	4	Cyclopentasiloxane, decamethyl-	0.7501	0.845	Cyclopentasiloxane, decamethyl-; Cycloheptasiloxane, tetradecamethyl-; Cyclohexasiloxane, dodecamethyl-; Cyclotrisiloxane, hexamethyl-
F05	F05: Multiple compounds	4	5-Tetradecene, (E)-	0.7369	0.8337	(S)-3,4-Dimethylpentanol; 5-Tetradecene, (E)-; 9-Octadecenoic acid, ethyl ester; Cyclopropane, 1-methyl-1-(1-methylethyl)-2-nonyl-
F06	F06: Terpenes compounds	4	(1R)-2,6,6-Trimethylbicyclo[3.1.1]hept-2-ene	0.6822	0.7742	(1R)-2,6,6-Trimethylbicyclo[3.1.1]hept-2-ene; Cyclohexene, 1-methyl-4-(1-methylethylidene)-; Camphene; Myrcene
F07	F07: (14,16)C-decanal and derivatives	3	Hexadecanal	0.7451	0.7895	Hexadecanal; 9-Tetradecenal, (Z)-; 13-Methyltetradecanal
F08	F08: (8, 12, 16)C-ane	3	Octane, 2,4,6-trimethyl-	0.6421	0.7064	Octane, 2,4,6-trimethyl-; Dodecane; Hexadecane
F09	F09: (9, 14)C-anol and derivatives	3	Tetradecanal	0.6412	0.7139	1-Tetradecanol; Tetradecanal; 2-Nonanol
F10	F10: Alkene compounds	3	Linalyl acetate	0.6389	0.818	Linalyl acetate; 1,4-p-Menthadien-7-al; Terpinene
F11	F11: Hexanoic acid derivatives	3	2-Hexanol	0.7712	0.7712	Hexanoic acid, butyl ester; 4-Hydroxy-3-hexanone; 2-Hexanol
F12	F12: Methanethiol and derivatives	3	Dimethyl trisulfide	0.7756	0.8074	Dimethyl trisulfide; Dimethyl sulfone; Methanethiol
F13	F13: Multiple compounds	3	2-Bromomethyl-1,3-dioxolane	0.6707	0.7365	Ethane, 1-ethoxy-1-methoxy-; Decane, 2,4,6-trimethyl-; 2-Bromomethyl-1,3-dioxolane
F14	F14: Multiple compounds	3	2-Hexadecene, 3,7,11,15-tetramethyl-, [R-[R*,R*-(E)]]-	0.604	0.651	2-Hexadecene, 3,7,11,15-tetramethyl-, [R-[R*,R*-(E)]]-; 2-Oxohexane; 1-Propanone, 1-cyclopropyl-
F15	F15: Multiple compounds	3	3-Pentanol	0.6653	0.7184	3-Pentanol; 2,3-Pentanedione; 4-Octanone, 5-hydroxy-2,7-dimethyl-
F16	F16: Propionate derivatives	3	Propanoic acid, propyl ester	0.6777	0.7341	1-Propanol; Ethyl propionate; Propanoic acid, propyl ester
F17	F17: SCFA derivatives	3	Methyl valerate	0.6015	0.6924	Methyl isobutyrate; Hexanoic acid, methyl ester; Methyl valerate
F18	F18: SCFA derivatives	3	Methyl propionate	0.741	0.7872	Methyl propionate; Methyl butyrate; Methyl acetate
F19	F19: SCFAs	3	Butyric acid	0.684	0.7901	Acetic acid; Butyric acid; Butanoic acid, butyl ester
F20	F20: SCFAs	3	Propanoic acid, 2-methyl-	0.7055	0.7969	Propanoic acid, 2-methyl-; Butanoic acid, 2-methyl-; Butanoic acid, 3-methyl-
F21	F21: (15, 17)C-ecyne	2	1-Pentadecyne	0.7751	0.7751	1-Pentadecyne; 1-Heptadecyne
F22	F22: (4, 5)C-anone derivatives	2	2-Butanone, 3-methyl-	0.6963	0.6963	2-Butanone, 3-methyl-; 3-Pentanone, 2-methyl-
F23	F23: (7, 10)C-anone and derivatives	2	2-Methyl-3-heptanone	0.6906	0.6906	2-Methyl-3-heptanone; 2-Decanone
F24	F24: (7, 8)C-enal	2	2-Octenal, (E)-	0.7023	0.7023	2-Octenal, (E)-; 2-Heptenal, (Z)-
F25	F25: (8, 9)C-anal	2	Octanal	0.7468	0.7468	Octanal; Nonanal
F26	F26: Acetone and Butanone	2	Acetone	0.8143	0.8143	Acetone; 2-Butanone
F27	F27: Benzene and Toluene	2	Toluene	0.8904	0.8904	Toluene; Benzene
F28	F28: Benzoic acid and derivatives	2	Benzoic acid, 3,4-dichlorophenyl ester	0.7545	0.7545	Benzoic acid, 3,4-dichlorophenyl ester; 309_Xylene
F29	F29: Cyclohexanecarboxylic acid and derivatives	2	Cyclohexanecarboxylic acid, methyl ester	0.8762	0.8762	Cyclohexanecarboxylic acid, methyl ester; Cyclohexanecarboxylic acid
F30	F30: Cyclohexene derivatives	2	Cyclohexene, 4-ethenyl-4-methyl-3-(1-methylethenyl)-1-(1-methylethyl)-, (3R-trans)-	0.7292	0.7292	Cyclohexene, 4-ethenyl-4-methyl-3-(1-methylethenyl)-1-(1-methylethyl)-, (3R-trans)-; 7-epi-a-Eudesmol
F31	F31: Dichloroacetic acid derivatives	2	Dichloroacetic acid, nonyl ester	0.7525	0.7525	Dichloroacetic acid, nonyl ester; Dichloroacetic acid, 4-hexadecyl ester
F32	F32: Hexadecacen and Hexadecene	2	Z-8-Hexadecene	0.8482	0.8482	E-2-Hexadecacen-1-ol; Z-8-Hexadecene
F33	F33: Ketones	2	Sulcatone	0.7856	0.7856	Sulcatone; 5,9-Undecadien-2-one, 6,10-dimethyl-
F34	F34: Long-chain fatty acid derivatives	2	Methyl hexadecanoic acid	0.6906	0.6906	Methyl tetradecanoate; Methyl hexadecanoic acid
F35	F35: Methylbutanals	2	Butanal, 2-methyl-	0.8814	0.8814	Butanal, 3-methyl-; Butanal, 2-methyl-
F36	F36: Multiple compounds	2	Eucalyptol	0.7457	0.7457	Eucalyptol; Pentadecane, 2,6,10,14-tetramethyl-
F37	F37: Multiple compounds	2	Bicyclo[2.2.1]hept-2-ene, 2-[(2,4-dinitrophenyl)thio]-	0.7933	0.7933	Bicyclo[2.2.1]hept-2-ene, 2-[(2,4-dinitrophenyl)thio]-; Bis[bicyclo[3.2.0]hept-2-en-4-yl]ether
F38	F38: Multiple compounds	2	o-Cymene	0.9051	0.9051	1,4-Methano-1H-Cyclopropa[d]pyridazine, 4,4a,5,5a-tetrahydro-6,6-dimethyl-; o-Cymene
F39	F39: Octene derivatives	2	R(-)3,7-Dimethyl-1,6-octadiene	0.6274	0.6274	R(-)3,7-Dimethyl-1,6-octadiene; 2-Octene, 2-methyl-6-methylene-
F40	F40: Phenylpropanoate derivatives	2	Methyl 3-phenylpropanoate	0.6543	0.6543	Methyl 3-phenylpropanoate; 3-Phenylpropanol
F41	F41: Phthalic acid derivatives	2	Phthalic acid, hexyl tridec-2-yn-1-yl ester	0.9348	0.9348	Phthalic acid, hexyl tridec-2-yn-1-yl ester; 1,2-Benzenedicarboxylic acid, bis(2-methylpropyl) ester
F42	F42: Propyl ester derivatives	2	Butanoic acid, 3-methyl-, propyl ester	0.7583	0.7583	Butanoic acid, 3-methyl-, propyl ester; Propyl 2-methylpropanoate
F43	F43: Styrene and derivatives	2	Styrene	0.8292	0.8292	Styrene; Ethylbenzene
F44	F44: Uremia toxins	2	p-Cresol	0.7213	0.7213	p-Cresol; Indolizine, 3-methyl-
F45	F45: Xylene	2	269_Xylene	0.6937	0.6937	269_Xylene; 272_Xylene
singleton	(-)-Borneol	1	(-)-Borneol	1	1	(-)-Borneol
singleton	(-)-Menthone	1	(-)-Menthone	1	1	(-)-Menthone
singleton	(+)-2-Bornanone	1	(+)-2-Bornanone	1	1	(+)-2-Bornanone
singleton	(2E,4E)-3,7-Dimethylocta-2,4-diene	1	(2E,4E)-3,7-Dimethylocta-2,4-diene	1	1	(2E,4E)-3,7-Dimethylocta-2,4-diene
singleton	1,1-Dichloropentane	1	1,1-Dichloropentane	1	1	1,1-Dichloropentane
singleton	1,3-Cyclohexadiene, 5-(1,5-dimethyl-4-hexenyl)-2-methyl-, [S-(R*,S*)]-	1	1,3-Cyclohexadiene, 5-(1,5-dimethyl-4-hexenyl)-2-methyl-, [S-(R*,S*)]-	1	1	1,3-Cyclohexadiene, 5-(1,5-dimethyl-4-hexenyl)-2-methyl-, [S-(R*,S*)]-
singleton	1,7-Di(3-ethylphenyl)-2,2,4,4,6,6-hexamethyl-1,3,5,7-tetraoxa-2,4,6-trisilaheptane	1	1,7-Di(3-ethylphenyl)-2,2,4,4,6,6-hexamethyl-1,3,5,7-tetraoxa-2,4,6-trisilaheptane	1	1	1,7-Di(3-ethylphenyl)-2,2,4,4,6,6-hexamethyl-1,3,5,7-tetraoxa-2,4,6-trisilaheptane
singleton	14-Octadecenoic acid, methyl ester	1	14-Octadecenoic acid, methyl ester	1	1	14-Octadecenoic acid, methyl ester
singleton	1-Butanol	1	1-Butanol	1	1	1-Butanol
singleton	1-Butene, 4-isothiocyanato-	1	1-Butene, 4-isothiocyanato-	1	1	1-Butene, 4-isothiocyanato-
singleton	1-Cyclohexyldimethylsilyloxyoctadecane	1	1-Cyclohexyldimethylsilyloxyoctadecane	1	1	1-Cyclohexyldimethylsilyloxyoctadecane
singleton	1-Decanol	1	1-Decanol	1	1	1-Decanol
singleton	1-Heptanol, 3-methyl-	1	1-Heptanol, 3-methyl-	1	1	1-Heptanol, 3-methyl-
singleton	1-Hexanol	1	1-Hexanol	1	1	1-Hexanol
singleton	1H-Pyrrole-2,5-dione, 3-ethyl-4-methyl-	1	1H-Pyrrole-2,5-dione, 3-ethyl-4-methyl-	1	1	1H-Pyrrole-2,5-dione, 3-ethyl-4-methyl-
singleton	1-Nonanol	1	1-Nonanol	1	1	1-Nonanol
singleton	1-Octen-3-ol	1	1-Octen-3-ol	1	1	1-Octen-3-ol
singleton	1-Pentene, 4,4-dimethyl-1,3-diphenyl-1-(trimethylsilyloxy)-	1	1-Pentene, 4,4-dimethyl-1,3-diphenyl-1-(trimethylsilyloxy)-	1	1	1-Pentene, 4,4-dimethyl-1,3-diphenyl-1-(trimethylsilyloxy)-
singleton	1-Propanol, 2-methyl-	1	1-Propanol, 2-methyl-	1	1	1-Propanol, 2-methyl-
singleton	1-Tetradecene	1	1-Tetradecene	1	1	1-Tetradecene
singleton	2(3H)-Furanone, 5-heptyldihydro-	1	2(3H)-Furanone, 5-heptyldihydro-	1	1	2(3H)-Furanone, 5-heptyldihydro-
singleton	2,2,4-Trimethyl-1,3-pentanediol diisobutyrate	1	2,2,4-Trimethyl-1,3-pentanediol diisobutyrate	1	1	2,2,4-Trimethyl-1,3-pentanediol diisobutyrate
singleton	2,3-Butanedione	1	2,3-Butanedione	1	1	2,3-Butanedione
singleton	2,4-Difluorobenzene, 1-benzyloxy-	1	2,4-Difluorobenzene, 1-benzyloxy-	1	1	2,4-Difluorobenzene, 1-benzyloxy-
singleton	2,4-Imidazolidinedione, 1-methyl-	1	2,4-Imidazolidinedione, 1-methyl-	1	1	2,4-Imidazolidinedione, 1-methyl-
singleton	2,5-Dihydroxybenzaldehyde, 2TMS derivative	1	2,5-Dihydroxybenzaldehyde, 2TMS derivative	1	1	2,5-Dihydroxybenzaldehyde, 2TMS derivative
singleton	2,5-Dimethylpyrazine	1	2,5-Dimethylpyrazine	1	1	2,5-Dimethylpyrazine
singleton	2-Heptanone	1	2-Heptanone	1	1	2-Heptanone
singleton	2-Heptanone, 5-methyl-	1	2-Heptanone, 5-methyl-	1	1	2-Heptanone, 5-methyl-
singleton	2-Hexene, 3,5,5-trimethyl-	1	2-Hexene, 3,5,5-trimethyl-	1	1	2-Hexene, 3,5,5-trimethyl-
singleton	2-Methyl-4-heptanone	1	2-Methyl-4-heptanone	1	1	2-Methyl-4-heptanone
singleton	2-Pentenoic acid, 4-hydroxy-	1	2-Pentenoic acid, 4-hydroxy-	1	1	2-Pentenoic acid, 4-hydroxy-
singleton	2-Piperidinone	1	2-Piperidinone	1	1	2-Piperidinone
singleton	2-Propanol, 1-methoxy-	1	2-Propanol, 1-methoxy-	1	1	2-Propanol, 1-methoxy-
singleton	2-Undecene, 9-methyl-, (E)-	1	2-Undecene, 9-methyl-, (E)-	1	1	2-Undecene, 9-methyl-, (E)-
singleton	3(2H)-Thiophenone, dihydro-2-methyl-	1	3(2H)-Thiophenone, dihydro-2-methyl-	1	1	3(2H)-Thiophenone, dihydro-2-methyl-
singleton	3,4-Dihydroxyphenylglycol	1	3,4-Dihydroxyphenylglycol	1	1	3,4-Dihydroxyphenylglycol
singleton	3,4-Hexanedione	1	3,4-Hexanedione	1	1	3,4-Hexanedione
singleton	3-Hexanol, 2-methyl-	1	3-Hexanol, 2-methyl-	1	1	3-Hexanol, 2-methyl-
singleton	3-Octanol	1	3-Octanol	1	1	3-Octanol
singleton	3-Pyridinecarbonitrile	1	3-Pyridinecarbonitrile	1	1	3-Pyridinecarbonitrile
singleton	4,5-Nonadiene	1	4,5-Nonadiene	1	1	4,5-Nonadiene
singleton	4-Acetoxy-3-methoxystyrene	1	4-Acetoxy-3-methoxystyrene	1	1	4-Acetoxy-3-methoxystyrene
singleton	4-Methyl-2,4-bis(p-hydroxyphenyl)pent-1-ene, 2TMS derivative	1	4-Methyl-2,4-bis(p-hydroxyphenyl)pent-1-ene, 2TMS derivative	1	1	4-Methyl-2,4-bis(p-hydroxyphenyl)pent-1-ene, 2TMS derivative
singleton	5H-Tetrazol-5-amine	1	5H-Tetrazol-5-amine	1	1	5H-Tetrazol-5-amine
singleton	5-hydroxy-7-methoxyflavanone, tert.-butyldimethylsilyl ether	1	5-hydroxy-7-methoxyflavanone, tert.-butyldimethylsilyl ether	1	1	5-hydroxy-7-methoxyflavanone, tert.-butyldimethylsilyl ether
singleton	Acetic acid, hexyl ester	1	Acetic acid, hexyl ester	1	1	Acetic acid, hexyl ester
singleton	Acetoin	1	Acetoin	1	1	Acetoin
singleton	Acetonitrile	1	Acetonitrile	1	1	Acetonitrile
singleton	Anethole	1	Anethole	1	1	Anethole
singleton	Benzaldehyde	1	Benzaldehyde	1	1	Benzaldehyde
singleton	Benzaldehyde, 3-bromo-5-methoxy-4-[(4-methylphenyl)methoxy]-	1	Benzaldehyde, 3-bromo-5-methoxy-4-[(4-methylphenyl)methoxy]-	1	1	Benzaldehyde, 3-bromo-5-methoxy-4-[(4-methylphenyl)methoxy]-
singleton	Benzaldehyde, 3-chloro-5-methoxy-4-[(4-methylphenyl)methoxy]-	1	Benzaldehyde, 3-chloro-5-methoxy-4-[(4-methylphenyl)methoxy]-	1	1	Benzaldehyde, 3-chloro-5-methoxy-4-[(4-methylphenyl)methoxy]-
singleton	Benzaldehyde, 4-(1-phenyl-2-propenyloxy)-	1	Benzaldehyde, 4-(1-phenyl-2-propenyloxy)-	1	1	Benzaldehyde, 4-(1-phenyl-2-propenyloxy)-
singleton	Benzaldehyde, 4-hydroxy-	1	Benzaldehyde, 4-hydroxy-	1	1	Benzaldehyde, 4-hydroxy-
singleton	Benzene, (2-isothiocyanatoethyl)-	1	Benzene, (2-isothiocyanatoethyl)-	1	1	Benzene, (2-isothiocyanatoethyl)-
singleton	Benzene, 1-(chloromethyl)-3-methoxy-	1	Benzene, 1-(chloromethyl)-3-methoxy-	1	1	Benzene, 1-(chloromethyl)-3-methoxy-
singleton	Benzene, 1-ethyl-4-methyl-	1	Benzene, 1-ethyl-4-methyl-	1	1	Benzene, 1-ethyl-4-methyl-
singleton	Benzeneacetic acid, methyl ester	1	Benzeneacetic acid, methyl ester	1	1	Benzeneacetic acid, methyl ester
singleton	Benzyl alcohol	1	Benzyl alcohol	1	1	Benzyl alcohol
singleton	Benzyl methyl ketone	1	Benzyl methyl ketone	1	1	Benzyl methyl ketone
singleton	Bicyclo[4.1.0]heptane, 7-methylene-	1	Bicyclo[4.1.0]heptane, 7-methylene-	1	1	Bicyclo[4.1.0]heptane, 7-methylene-
singleton	Butanoic acid, 3-methyl-, 3-methylbutyl ester	1	Butanoic acid, 3-methyl-, 3-methylbutyl ester	1	1	Butanoic acid, 3-methyl-, 3-methylbutyl ester
singleton	Butanoic acid, propyl ester	1	Butanoic acid, propyl ester	1	1	Butanoic acid, propyl ester
singleton	Carbamic acid	1	Carbamic acid	1	1	Carbamic acid
singleton	Carbamic acid, (2,4-difluorophenyl)-, 5-methyl-2-(1-methylethyl)phenyl ester	1	Carbamic acid, (2,4-difluorophenyl)-, 5-methyl-2-(1-methylethyl)phenyl ester	1	1	Carbamic acid, (2,4-difluorophenyl)-, 5-methyl-2-(1-methylethyl)phenyl ester
singleton	Carbon dioxide	1	Carbon dioxide	1	1	Carbon dioxide
singleton	Carbon disulfide	1	Carbon disulfide	1	1	Carbon disulfide
singleton	Carbonic acid, prop-1-en-2-yl tetradecyl ester	1	Carbonic acid, prop-1-en-2-yl tetradecyl ester	1	1	Carbonic acid, prop-1-en-2-yl tetradecyl ester
singleton	cis-11-Hexadecenal	1	cis-11-Hexadecenal	1	1	cis-11-Hexadecenal
singleton	cis-9-Hexadecenal	1	cis-9-Hexadecenal	1	1	cis-9-Hexadecenal
singleton	Copaene	1	Copaene	1	1	Copaene
singleton	Cyclobutane, 1,2-diethenyl-3,4-dimethyl-	1	Cyclobutane, 1,2-diethenyl-3,4-dimethyl-	1	1	Cyclobutane, 1,2-diethenyl-3,4-dimethyl-
singleton	Cyclohexane, 1,1-methylenebis-	1	Cyclohexane, 1,1-methylenebis-	1	1	Cyclohexane, 1,1-methylenebis-
singleton	Cyclohexanecarboxylic acid, ethyl ester	1	Cyclohexanecarboxylic acid, ethyl ester	1	1	Cyclohexanecarboxylic acid, ethyl ester
singleton	Cyclohexanemethanol	1	Cyclohexanemethanol	1	1	Cyclohexanemethanol
singleton	Cyclohexanol, 4-ethenyl-4-methyl-3-(1-methylethenyl)-	1	Cyclohexanol, 4-ethenyl-4-methyl-3-(1-methylethenyl)-	1	1	Cyclohexanol, 4-ethenyl-4-methyl-3-(1-methylethenyl)-
singleton	Cyclohexanone, 2,2,6-trimethyl-	1	Cyclohexanone, 2,2,6-trimethyl-	1	1	Cyclohexanone, 2,2,6-trimethyl-
singleton	Cyclohexene, 3-(1,5-dimethyl-4-hexenyl)-6-methylene-, [S-(R*,S*)]-	1	Cyclohexene, 3-(1,5-dimethyl-4-hexenyl)-6-methylene-, [S-(R*,S*)]-	1	1	Cyclohexene, 3-(1,5-dimethyl-4-hexenyl)-6-methylene-, [S-(R*,S*)]-
singleton	Cyclopentanecarboxylic acid, 4-nitrophenyl ester	1	Cyclopentanecarboxylic acid, 4-nitrophenyl ester	1	1	Cyclopentanecarboxylic acid, 4-nitrophenyl ester
singleton	Decane, 2,2,3-trimethyl-	1	Decane, 2,2,3-trimethyl-	1	1	Decane, 2,2,3-trimethyl-
singleton	Di(1,2,5-oxadiazolo)[3,4-b:3,4-E]pyrazine, 4,8-diacetyl-	1	Di(1,2,5-oxadiazolo)[3,4-b:3,4-E]pyrazine, 4,8-diacetyl-	1	1	Di(1,2,5-oxadiazolo)[3,4-b:3,4-E]pyrazine, 4,8-diacetyl-
singleton	Disiloxane, hexamethyl-	1	Disiloxane, hexamethyl-	1	1	Disiloxane, hexamethyl-
singleton	Disulfide, methyl 2-propenyl	1	Disulfide, methyl 2-propenyl	1	1	Disulfide, methyl 2-propenyl
singleton	Ethanol	1	Ethanol	1	1	Ethanol
singleton	Ethanol, 1-(2-butoxyethoxy)-	1	Ethanol, 1-(2-butoxyethoxy)-	1	1	Ethanol, 1-(2-butoxyethoxy)-
singleton	Ethanol, 2-ethoxy-	1	Ethanol, 2-ethoxy-	1	1	Ethanol, 2-ethoxy-
singleton	Ethanone, 1-(2-aminophenyl)-	1	Ethanone, 1-(2-aminophenyl)-	1	1	Ethanone, 1-(2-aminophenyl)-
singleton	Ethyl Acetate	1	Ethyl Acetate	1	1	Ethyl Acetate
singleton	Ethyl methyl disulfide	1	Ethyl methyl disulfide	1	1	Ethyl methyl disulfide
singleton	Furan, 2-pentyl-	1	Furan, 2-pentyl-	1	1	Furan, 2-pentyl-
singleton	Heptacosane	1	Heptacosane	1	1	Heptacosane
singleton	Heptanal	1	Heptanal	1	1	Heptanal
singleton	Heptane, 2,2,4,6,6-pentamethyl-	1	Heptane, 2,2,4,6,6-pentamethyl-	1	1	Heptane, 2,2,4,6,6-pentamethyl-
singleton	Heptanoic acid	1	Heptanoic acid	1	1	Heptanoic acid
singleton	Heptasiloxane, hexadecamethyl-	1	Heptasiloxane, hexadecamethyl-	1	1	Heptasiloxane, hexadecamethyl-
singleton	Hexanal	1	Hexanal	1	1	Hexanal
singleton	Hexanoic acid	1	Hexanoic acid	1	1	Hexanoic acid
singleton	Hordenine	1	Hordenine	1	1	Hordenine
singleton	Indole	1	Indole	1	1	Indole
singleton	Isopentanol	1	Isopentanol	1	1	Isopentanol
singleton	Isophthalic acid, butyl tridec-2-ynyl ester	1	Isophthalic acid, butyl tridec-2-ynyl ester	1	1	Isophthalic acid, butyl tridec-2-ynyl ester
singleton	Isopropyl Alcohol	1	Isopropyl Alcohol	1	1	Isopropyl Alcohol
singleton	Linalool	1	Linalool	1	1	Linalool
singleton	Mequinol	1	Mequinol	1	1	Mequinol
singleton	Mesitylene	1	Mesitylene	1	1	Mesitylene
singleton	Methanesulfonic anhydride	1	Methanesulfonic anhydride	1	1	Methanesulfonic anhydride
singleton	Methyl Alcohol	1	Methyl Alcohol	1	1	Methyl Alcohol
singleton	Methyl salicylate	1	Methyl salicylate	1	1	Methyl salicylate
singleton	Methylamine, N,N-dimethyl-	1	Methylamine, N,N-dimethyl-	1	1	Methylamine, N,N-dimethyl-
singleton	Naphthalene, 1,2,3,5,6,7,8,8a-octahydro-1,8a-dimethyl-7-(1-methylethenyl)-	1	Naphthalene, 1,2,3,5,6,7,8,8a-octahydro-1,8a-dimethyl-7-(1-methylethenyl)-	1	1	Naphthalene, 1,2,3,5,6,7,8,8a-octahydro-1,8a-dimethyl-7-(1-methylethenyl)-
singleton	n-Hexane	1	n-Hexane	1	1	n-Hexane
singleton	Octadecane	1	Octadecane	1	1	Octadecane
singleton	Octane	1	Octane	1	1	Octane
singleton	Octane, 6-ethyl-2-methyl-	1	Octane, 6-ethyl-2-methyl-	1	1	Octane, 6-ethyl-2-methyl-
singleton	Oxime-, methoxy-phenyl-_	1	Oxime-, methoxy-phenyl-_	1	1	Oxime-, methoxy-phenyl-_
singleton	Pentadecanal	1	Pentadecanal	1	1	Pentadecanal
singleton	Pentadecane	1	Pentadecane	1	1	Pentadecane
singleton	Pentanal, 2,4-dimethyl-	1	Pentanal, 2,4-dimethyl-	1	1	Pentanal, 2,4-dimethyl-
singleton	Phenol	1	Phenol	1	1	Phenol
singleton	Phenol, 4-ethyl-	1	Phenol, 4-ethyl-	1	1	Phenol, 4-ethyl-
singleton	Phenylacetaldehyde	1	Phenylacetaldehyde	1	1	Phenylacetaldehyde
singleton	Phenylethyl Alcohol	1	Phenylethyl Alcohol	1	1	Phenylethyl Alcohol
singleton	Pivalic acid, 2-methylpropyl ester	1	Pivalic acid, 2-methylpropyl ester	1	1	Pivalic acid, 2-methylpropyl ester
singleton	Propanoic acid, 2-methyl-, anhydride	1	Propanoic acid, 2-methyl-, anhydride	1	1	Propanoic acid, 2-methyl-, anhydride
singleton	Propanoic acid, butyl ester	1	Propanoic acid, butyl ester	1	1	Propanoic acid, butyl ester
singleton	Propionic acid	1	Propionic acid	1	1	Propionic acid
singleton	Quinoline	1	Quinoline	1	1	Quinoline
singleton	Tetrahydropyran Z-10-dodecenoate	1	Tetrahydropyran Z-10-dodecenoate	1	1	Tetrahydropyran Z-10-dodecenoate
singleton	Thiophene, 2-pentyl-	1	Thiophene, 2-pentyl-	1	1	Thiophene, 2-pentyl-
singleton	trans-2-Dodecen-1-ol	1	trans-2-Dodecen-1-ol	1	1	trans-2-Dodecen-1-ol
singleton	trans-Raphasatin	1	trans-Raphasatin	1	1	trans-Raphasatin
singleton	Tributyl phosphate	1	Tributyl phosphate	1	1	Tributyl phosphate
singleton	Vinyl crotonate	1	Vinyl crotonate	1	1	Vinyl crotonate
singleton	Z-1,6-Tridecadiene	1	Z-1,6-Tridecadiene	1	1	Z-1,6-Tridecadiene
rho: Spearman correlation coefficient

## Sheet: ST8
Supplementary Table 8| Detailed information of the gut microbiome sequencing data, genome assembly and gene predictions.
Sample ID	Raw sequencing data (Gbp)	High quality sequencing data (Gbp)	Number of assembled scaffolds	Total length of scaffolds (bp)	N50 length of scaffolds (bp)	Number of predicted genes	Total length of genes (bp)	N50 length of genes (bp)
CON-001	17.63	16.4	220445	239253625	7222	347045	204783825	888
CON-002	11.13	10.59	143749	253361674	10574	315302	221963322	999
CON-003	11.79	10.58	172910	204809057	4773	295286	176850933	864
CON-004	13.43	13.07	297234	394906588	3586	550886	342619146	855
CON-005	11.48	11.05	244964	331661579	7049	448744	288915144	939
CON-006	13.64	13.16	254186	341045901	6222	459743	296389164	942
CON-007	7.34	7.11	161468	197229951	2545	284208	171057666	810
CON-008	11.47	11.16	280365	342882506	3314	489554	295870914	837
CON-009	11.98	11.71	109467	133422911	3984	188911	115449312	846
CON-010	11.79	11.5	182576	228819035	5017	322756	198474201	885
CON-011	13.19	12.66	195424	273701128	5461	366929	237825120	918
CON-012	11.33	11.11	248099	271175302	2962	402604	231400500	798
CON-013	12.3	12.07	260748	328441321	4634	464117	284203815	864
CON-014	10.7	10.37	256031	357128434	3698	484417	310823394	873
CON-015	11.11	10.15	199924	254528036	4940	360431	220546416	867
CON-016	12.88	12.24	338709	393192204	2609	576157	340606470	807
CON-017	12	11.35	220074	283609849	4225	394992	246195648	870
CON-018	12.49	11.63	271885	342775530	3752	490838	297454476	846
CON-019	13.07	12.22	269313	225093265	1334	380135	191726046	660
CON-020	11.33	11.1	102473	184114137	9732	237557	160227858	933
CON-021	11.9	11.33	328044	330604316	2051	516473	283036920	735
CON-022	11.76	11.55	92434	122755715	4751	168709	104805432	876
CON-023	12.49	11.8	232940	273550637	2680	398392	235928481	807
CON-024	10.74	10.16	201159	246161462	3229	351295	212678547	840
CON-025	10.41	10.15	208302	306361723	6461	405317	267124947	933
CON-026	11.79	11.49	209291	242181891	3550	343508	209158572	867
CON-027	10.96	10.68	149736	234305250	6294	305700	204110499	921
CON-028	13.9	13.54	232402	263182326	2441	388333	228252798	801
CON-029	11.85	11.57	201055	271232692	4980	372834	235812987	888
CON-030	11.89	11.55	317254	380992047	2577	553057	327128679	813
CON-031	12.04	11.64	247901	355932106	5787	473998	309513498	927
CON-032	11.93	11.64	268419	271067759	1846	421258	233886552	741
CON-033	12.88	12.65	317762	375179262	2927	552628	324486180	795
CON-034	11.17	10.19	114771	142824781	4950	200540	124095579	885
CON-035	13.03	12.57	71382	109045868	11307	142314	95054820	933
CON-036	12.14	11.88	164948	228869632	4644	310702	198519213	888
CON-037	11.52	11.3	88725	104324231	3002	150338	88317375	822
CON-038	12.08	11.82	200723	173724373	1454	287944	149846688	675
CON-039	12.87	12.19	232937	331135647	5460	442795	287629722	921
CON-040	14.3	14.04	270099	319029212	2959	459621	276397575	837
CON-041	9.93	9.66	128599	146323546	2391	217873	126202389	777
CON-042	9.73	9.45	89428	148816051	10266	188082	129138249	963
CON-043	11.05	10.66	223323	300714813	4471	413441	260586894	879
CON-044	11.19	11	278491	258733024	1506	422610	220053411	678
CON-045	12.89	12.2	257925	339397033	5042	468801	294698775	888
CON-046	12.28	12.03	179675	231315112	3758	320995	201458679	873
CON-047	10.93	10.7	281841	299209839	2467	456642	255569892	771
CON-048	11.65	11.4	185752	196069382	2140	300121	168567957	756
CON-049	15.32	14.77	450225	439203760	2428	690330	378812193	768
CON-050	9.35	8.61	186045	275569332	6777	366862	239203350	915
CON-051	9.49	9.28	147103	201492465	5117	273961	173973651	888
CON-052	8.07	7.8	182601	234692214	3717	328328	203136567	858
CON-053	10.77	10.54	188779	208920595	2182	311654	180410499	771
CON-054	15.42	15.09	475709	495605931	2158	760641	432362658	774
CON-055	11.38	11	259746	318710629	3726	451099	276945651	846
CON-056	10.76	10.5	122076	175350810	5381	232371	152337447	912
CON-057	12.51	12.24	255687	311696667	3481	441445	270773127	855
CON-058	10.68	10.41	108698	187613565	9811	236284	164061327	981
CON-059	14.01	13.75	118064	169312744	9045	227976	146624547	903
CON-060	10.95	10.64	166801	207435509	3893	292011	178439373	852
CON-061	13.13	12.45	190051	212083627	2606	311908	182612646	801
CON-062	9.74	9.16	170163	237349137	5058	318123	205299531	909
CON-063	13.08	12.14	161164	262121176	10878	336666	227587272	948
CON-064	11.41	11.16	153935	207696285	8163	281553	179854839	915
CON-065	11.77	10.96	382250	406700390	3007	615992	348734601	798
CON-066	12.35	12	346918	372518397	2278	564748	320461785	771
CON-067	12.77	12.28	356207	389241215	2720	586135	334883706	792
CON-068	11.94	11.04	166282	207509757	6066	294860	180374031	897
CON-069	12.88	12.61	97319	150032986	9083	196170	130856673	930
KD-001	9.91	9.69	125783	169652086	4246	231559	146517117	885
KD-002	12.07	11.82	122665	211227192	8205	267234	184978221	957
KD-003	8.04	7.8	171643	240459674	6300	323169	210054420	912
KD-004	10.11	9.9	163530	209911940	2847	297991	182415084	822
KD-005	10.46	10.24	213996	250463463	2828	364260	216840561	813
KD-006	8.19	7.98	131820	182277515	3952	251014	158676738	864
KD-007	9.26	8.97	221590	240657054	2724	361067	207530463	786
KD-008	9.57	9.35	178690	191527121	2399	287902	163911441	780
KD-009	7.61	7.4	93725	127872105	3571	176093	111241587	852
KD-010	8.76	8.55	146377	186684348	3738	263312	161806044	837
KD-011	7.62	7.44	105805	160098256	6360	209088	139142184	942
KD-012	11.33	10.87	228895	298261139	5433	414442	258893424	903
KD-013	12.45	11.66	252565	340748525	5384	464949	297032151	906
KD-014	9.03	8.82	98562	148304356	5383	196710	129102588	900
KD-015	7.12	6.91	97952	142439738	4616	192833	123989088	885
KD-016	14.09	13.83	199036	243735070	4780	347223	208369806	843
KD-017	8.11	7.51	181576	221780454	2448	329926	190964217	765
KD-018	11.41	10.66	223175	250378897	4192	367806	217759110	855
KD-019	10.66	10.05	311374	347176371	3411	508130	298358853	840
KD-020	14.9	14.08	63700	94864999	7720	122539	81294096	930
KD-021	12.89	12.04	162691	221195203	4646	304336	191926377	879
KD-022	12.91	12.46	178207	183889323	2303	280191	155782635	762
KD-023	6.04	5.93	144505	178096484	2499	256785	154239075	795
KD-024	8.76	8.24	134425	209575862	7446	275453	182908797	924
KD-025	13.75	13.46	131304	173579278	3947	240993	150869451	870
KD-026	13.71	13.31	211412	247827370	3438	355837	213526155	843
KD-027	14.01	13.5	66552	118088572	18668	140917	102221010	1035
KD-028	11.91	11.47	168985	236293338	4929	321734	205517460	894
KD-029	11.31	11.09	102776	135353121	4645	191726	117824286	876
KD-030	10.55	10.34	216457	261743116	2861	377873	226634985	804
KD-031	10.38	10.2	196943	275751251	5172	375316	239737491	891
KD-032	14.15	13.56	212670	300391896	5704	402074	261534339	918
KD-033	12.1	11.52	138290	161102043	2787	235392	140263818	819
KD-034	11.46	10.92	179571	238930765	5523	329777	206198280	891
KD-035	12.15	11.23	236425	306993174	4823	429040	267065142	882
KD-036	15.42	14.83	183709	213829326	4338	298460	182068908	870
KD-037	13.59	12.88	294616	291647017	2608	450808	252709380	786
KD-038	11.77	11.36	148613	186216845	4088	259261	160602420	879
KD-039	15.09	14.7	221564	255543773	5064	359502	217606581	882
KD-040	10.63	10.47	240622	316546097	3766	443885	274624386	849
KD-041	12.18	11.94	258269	309813363	3485	444502	267964449	831
KD-042	12.45	12.27	265202	260422078	1661	419836	221196861	693
KD-043	11.3	11.11	108803	155673551	5682	208761	135529662	909
KD-044	12.49	12.28	91476	161769177	12152	203782	141667710	966
KD-045	10.83	10.61	233369	314231828	4476	440267	271395039	840
KD-046	9.9	9.72	88765	135445774	7698	181327	117136035	909
KD-047	12.3	12.1	202257	273494480	5725	378438	238009017	891
KD-048	11.06	10.88	235403	248812719	2180	384655	213173514	738
KD-049	11.28	11.06	113156	200889948	9695	252827	174664182	960
KD-050	11.47	11.27	198767	235703093	2780	347317	202453818	777
KD-051	13.99	13.78	167446	191602971	3196	283858	162793815	786
KD-052	12.97	12.78	179033	195612398	2297	294244	167442897	753
KD-053	12.03	11.83	141668	236615855	10928	302270	205772427	957
KD-054	10.19	9.94	256803	291382226	2705	432195	249490824	786
KD-055	11.71	10.98	191292	273383774	4255	375889	237105315	876
KD-056	12.62	11.67	87938	95966068	5172	141779	82643133	840
KD-057	12.15	11.84	329558	366075279	2431	546564	317238234	783
KD-058	12.76	12.07	242280	317292360	4379	434583	275028558	885
KD-059	11.27	10.97	105332	190704373	9248	239044	166945014	966
KD-060	11.14	10.86	170799	246464523	4885	328007	214517046	909
KD-061	12.42	12.06	334137	288684517	2247	450216	242152740	774
KD-062	12.34	11.99	168901	239702402	4646	324070	207320532	870
KD-063	9.51	9.09	188968	199753777	2106	302401	172087317	774
KD-064	12.61	11.9	116326	222853166	17133	267443	194621280	1026
KD-065	13.56	13.34	115962	124750355	4874	178217	106186557	846
KD-066	11.64	10.82	64539	80394417	4457	112721	69605751	867
KD-067	11.72	10.98	127888	96307823	1980	166619	81793773	711
KD-068	9.72	9.05	294511	345134525	3471	506917	299242254	822
KD-069	10.85	10.65	246347	293767383	3790	425828	254824101	846
KD-070	9.21	8.68	133761	177170624	4090	243749	153899988	885
KD-071	11.01	10.37	209124	262181233	5054	372830	226396329	867
KD-072	12.85	12.1	64504	129902258	29451	158298	113542611	984
KD-073	10.57	9.97	184212	253992201	4881	350486	220454451	879
KD-074	13.32	13.03	91188	144713866	7754	191080	125961495	921
KD-075	12.1	11.25	219742	259342771	3987	358336	222416343	867
KD-076	11.96	11.65	116557	161808133	4657	224019	139362972	858
KD-077	12.35	12.1	248194	320465724	4213	441278	276798375	876
KD-078	15.51	15.21	193627	246896030	5523	350279	214235304	858
KD-079	12.34	12.03	285068	364357006	3524	522086	316033701	825
KD-080	12.61	12.27	285434	373217174	3459	530053	323442855	840
KD-081	11.29	11.04	140055	203333277	5976	273355	177672708	906
KD-082	9.73	9.11	275211	319730827	3114	467456	277112262	831
KD-083	12.28	12.07	96840	174331159	8351	219176	152271813	954
KD-084	10.86	10.56	122194	189942119	7902	258164	165572775	888
KD-085	11.97	11.38	82745	139300720	10536	173830	121321848	978
KD-086	11.79	11.47	225642	296398756	5021	408269	256136598	876
KD-087	10.58	10.26	204043	310548893	7045	412798	269863329	918
KD-088	10.13	9.64	135359	128342146	2646	196378	110086461	798
KD-089	11.88	11.37	240374	263123664	3521	379809	225858006	852
KD-090	11.23	10.49	155699	192652514	3963	264949	166685847	879
KD-091	14.91	14.2	292832	294859805	3098	434019	249330501	801
KD-092	8.81	8.55	214809	315033588	4374	424218	275280900	888
KD-093	17.29	16.64	267115	215641849	2784	326987	177926808	810
KD-094	12.71	12.36	278580	322000726	2610	473221	279439977	801
KD-095	11.62	11.34	188385	262788733	4450	358468	228913851	891
KD-096	11.92	11.65	76256	137413218	16467	170067	120628317	1014
KD-097	10.36	9.97	80750	134281839	6755	177042	116864037	900
KD-098	11.09	10.68	77591	128905674	8854	166619	112406913	945
KD-099	11.87	10.87	125678	184060307	8391	239128	160366764	954
KD-100	12.36	11.61	299851	343788660	2942	506628	297941250	813
KD-101	14.71	14.31	81957	137260783	9863	171513	119240583	993
KD-102	9.65	9.32	313036	353830733	2924	528221	304350747	798
KD-103	10.36	9.56	234090	265746252	2561	397899	230601000	774
KD-104	13	12.78	96009	140580313	7490	186421	122547858	936
KD-105	13.02	12.29	301079	306432888	2483	471950	260407344	768
KD-106	11.93	11.7	205087	252067395	2902	363029	218579784	828
KD-107	12.08	11.82	174371	214009771	4141	308359	184644198	846
KD-108	10.28	9.46	219338	276872830	3991	392876	240299835	864
KD-109	11.94	11.69	208440	288637030	6367	399449	250632705	906
KD-110	12.44	11.82	191700	229986421	3801	330107	197776461	831
KD-111	9.8	8.87	291335	326217893	2471	494047	282889242	771
KD-112	10.62	10.03	259346	294250105	3184	436382	254115180	807
KD-113	11.98	11.37	113485	161279897	4857	220518	139222716	870
KD-114	9.85	9.02	197379	279321348	4920	377970	242950470	897
KD-115	11.46	10.3	135681	186178937	3591	253388	160681809	873
KD-116	14.33	14.07	292058	303732596	2834	457403	261648234	813
KD-117	11.02	10.17	279088	361484664	3535	508283	315501036	852
KD-118	12.36	11.98	47624	81807968	29906	102467	71209695	1029
KD-119	10.2	10	138650	174164824	3396	245946	150579525	837
KD-120	12.95	12.64	126884	169235799	4738	236483	146025222	867
KD-121	13.07	12.72	82306	145283294	15329	180975	126277158	984
KD-122	14.56	12.26	102127	167040052	10568	209974	143566209	960
KD-123	11.91	11.34	204769	296886352	5601	402874	257459574	888
KD-124	11.31	10.89	173780	273328531	6601	357425	238134453	924
KD-125	10.33	10.11	171980	200417812	2518	299376	173710188	777
KD-126	10.74	10.5	139093	178488558	3628	250562	154816944	846
KD-127	12.76	12.5	177379	243895757	4079	336743	211735878	861
KD-128	13.09	12.44	269992	332947075	3084	477998	288664065	828
KD-129	12.59	12.29	148838	245192246	6597	311443	214815141	954
KD-130	13.7	13.01	404887	385657349	2044	591818	328534995	765
KD-131	5.01	4.81	121243	170386708	3065	236585	148567677	843
KD-132	11.34	10.99	132441	202244989	5995	270714	175814850	894
KD-133	10.73	10.41	203947	252179219	3203	350486	221983932	876
KD-134	6.87	6.71	262943	268498732	1622	422431	230415663	699
KD-135	11.36	11.05	122541	183634321	5930	244308	160729851	912
KD-136	11.97	10.95	133724	193541742	5714	261150	167390703	900
KD-137	13.23	12.41	312869	267478266	1923	437617	226120212	720
KD-138	11.33	11.08	180206	237477696	4585	328898	206020755	879
KD-139	10.55	9.92	85674	159867418	11389	199106	139796337	972
KD-140	10.77	10.21	267758	404443990	5636	541528	352642506	912
KD-141	11.56	10.6	87723	122428986	7182	165729	106053906	891
KD-142	7.5	7.32	128613	183075352	4898	248725	159134484	885
KD-143	12.36	11.75	168911	264714868	5710	351959	230098281	903
KD-144	11.94	11.22	239856	290550749	3514	416297	250310925	843
KD-145	14.56	14.23	155679	207248344	4407	287126	179918040	861
KD-146	8.3	8.02	132758	187920109	4586	253419	163813089	885
KD-147	13.57	12.99	234348	307456053	4331	428305	263674875	873
KD-148	8.7	8.48	212401	262368012	2918	376764	227430972	819
KD-149	8.61	8.42	54056	106978385	11628	127490	93633354	1023
KD-150	11.1	10.85	123442	142775083	3372	204345	122623227	831
KD-151	13.61	13.29	208258	274924329	3712	383046	236691678	858
KD-152	9.26	9.07	137997	157846479	2386	233970	135203961	777
KD-153	9.27	8.94	190538	212009779	4014	307705	183759168	849
KD-154	8.29	8.06	93960	138771966	4253	188377	120990717	882
KD-155	13.35	13.1	293482	339083220	3691	498795	292648614	837
KD-156	9.94	9.43	172182	241722218	6982	329289	210557040	885
KD-157	11.97	11.3	280866	397187566	6026	546326	343399242	882
KD-158	11.95	11.35	232192	308289886	4142	428407	267456348	855
KD-159	12.67	12.28	214528	325232030	6638	434186	283188603	915
KD-160	12.33	11.97	241101	306332055	4068	432753	266860962	855
KD-161	10.2	9.31	45509	115672355	36175	133752	101788482	1056
KD-162	10.63	10.08	231198	283342128	4159	404281	243572178	858
KD-163	12.59	12.37	113719	186354995	6863	236686	161924046	966
KD-164	12.4	11.72	78920	147960067	15421	184839	129143748	972
KD-165	11.16	10.6	125531	220434069	9625	277422	192250470	957
KD-166	11	10.75	241682	264128616	2314	396446	225930378	768
KD-167	12.65	10.6	185821	228212150	4856	322487	196189401	876
KD-168	12.47	12.12	246885	315787000	3845	441848	274568913	870
KD-169	12.1	11.85	202586	257708052	4218	355909	223200519	885
KD-170	12.1	11.48	165506	245656343	5872	326470	213405693	918
KD-171	13.5	13.3	254240	247879006	2800	370983	210400143	807
KD-172	10.53	10.34	135026	193344041	5334	260345	166088940	900
KD-173	10.42	9.73	300323	303100196	2205	473922	262018338	759
KD-174	13.94	13.68	284282	329755062	3919	478961	285722646	861
KD-175	11.15	10.76	129474	193811490	9414	255972	168319107	930
KD-176	12.24	11.93	211134	293196627	4532	396313	255324747	897
KD-177	10.42	10.19	144238	217186225	6467	282245	190010853	957
KD-178	12.46	12.09	349949	420725663	3961	602626	366636906	867
KD-179	10.22	9.92	307089	306599826	3009	471678	262969140	804
KD-180	11.8	11.25	185997	242483135	6716	336293	210506247	909
KD-181	12.76	12.51	207841	262315103	3525	371474	228384315	852
KD-182	13.52	12.86	292858	270364616	1957	435688	233138832	729
KD-183	11.36	10.49	179682	275718586	6972	366936	240701670	912
KD-184	11.35	11.13	154461	163182331	2020	249438	140581956	750
KD-185	11.16	9.06	207257	234843603	2723	343923	202883634	816
KD-186	15.02	14.27	256571	383296881	6093	510698	336105759	924
KD-187	13.5	13.24	332613	328556066	3131	516367	283872750	804
KD-188	12.39	12.12	244454	332593342	3879	464699	288698532	855
KD-189	14.76	14.04	240048	273081517	3005	396119	236053179	834
KD-190	13.04	12.4	263108	282007808	2880	426383	243024759	792
KD-191	9.92	9.43	78680	135641956	11564	172575	118706316	969
KD-192	12.27	11.58	215610	266121701	4101	380815	231510972	843
KD-193	11.83	11.02	121310	189287882	9711	247214	165639687	942
KD-194	11	9.98	249953	286990394	2848	427950	248743203	801
KD-195	14.19	13.89	368958	378198538	2464	590526	327390168	765
KD-196	10.94	10.7	194778	287620954	7634	389583	249962568	897
KD-197	11.02	10.3	221605	284699105	3892	406632	248145705	837
KD-198	12.14	11.62	180644	255931446	4451	350229	222555246	864
KD-199	13.64	13	148170	198118437	6134	274021	172289376	879
KD-200	13.98	13.64	229605	288260152	3184	412724	250289013	816
KD-201	9.97	9.43	104447	199827545	14240	251825	174756633	960
KD-202	12.44	11.92	168504	247403243	5033	325672	215228283	924
KD-203	13.54	13.2	203137	265916784	3854	373005	230783367	855
KD-204	12.02	11.32	235171	278191057	3308	402572	241100631	834
KD-205	13.16	12.83	234190	304744681	3453	432229	265192791	846
KD-206	12.72	11.92	217740	268774570	4770	377955	231545184	876
KD-207	11.79	11.51	190315	260655081	4571	361269	225223299	864
KD-208	12.45	12.22	320240	398221278	3386	575589	344897571	825
KD-209	12.24	11.45	232229	286520030	4086	410212	248684484	861
KD-210	13.21	12.97	116320	129367286	8467	180305	112108920	975
KD-211	10.58	10.33	118317	178815739	6079	234789	155909142	927
KD-212	12.24	11.67	280926	305706642	2673	463368	264513522	771
KD-213	13.01	12.13	48875	84781219	9957	103947	73762065	996
KD-214	11.52	10.67	139816	190952066	7279	261468	166032936	909
KD-215	12.7	12.35	418668	472355096	3211	695792	410774601	834
KD-216	11.44	11.07	158242	258713648	8745	340468	225820986	927
KD-217	7.89	7.46	66098	107219545	15827	141671	93122415	918
KD-218	11.13	10.14	149695	204977052	6024	278140	177766827	915
KD-219	11.59	10.64	314988	339798119	2644	521037	292623054	771
KD-220	12.67	12.04	160863	149717281	2010	234250	129065928	762
KD-221	13.46	12.66	254977	224726780	2208	357840	187836579	741
KD-222	12.02	11.12	199293	273810826	5024	372895	238477275	891
KD-223	10.43	9.93	110725	187086406	7224	235912	163153983	957

## Sheet: ST9
Supplementary Table 9| Summary information of 900 metagenomic species (MGS) generated in this study.
Metagenomic species ID	No. of genes	Taxonomy assignment	Taxonomy level	Best matched species	Genes (%)	Similarity (%)	Best matched genera	Genes (%)	Similarity (%)	SpecI assignment	Similarity (%)
M001	5625	Faecalibacterium	Genus	Faecalibacterium prausnitzii	27.96	79.25	Faecalibacterium	27.96	79.25	Subdoligranulum variabile	86.77
M002	820	Faecalibacterium	Genus	Faecalibacterium prausnitzii	34.76	79.61	Faecalibacterium	34.76	79.61	Subdoligranulum variabile	81.87
M003	2651	Faecalibacterium	Genus	Faecalibacterium prausnitzii	37.65	78.85	Faecalibacterium	37.65	78.85	Subdoligranulum variabile	85.29
M004	9827	Faecalibacterium	Genus	Faecalibacterium prausnitzii	35.83	79.92	Faecalibacterium	35.83	79.92	Subdoligranulum variabile	87.24
M005	1024	Faecalibacterium	Genus	Faecalibacterium prausnitzii	28.32	79.54	Faecalibacterium	28.32	79.54	Subdoligranulum variabile	79.54
M006	11843	Faecalibacterium	Genus	Faecalibacterium prausnitzii	27.33	79.39	Faecalibacterium	27.33	79.39	Subdoligranulum variabile	82.5
M007	15098	Faecalibacterium prausnitzii	Species	Faecalibacterium prausnitzii	82.2	86.04	Faecalibacterium	82.2	86.04	Faecalibacterium prausnitzii	95.99
M008	776	Faecalibacterium prausnitzii	Species	Faecalibacterium prausnitzii	98.07	95.55	Faecalibacterium	98.07	95.55	Faecalibacterium prausnitzii	95.45
M009	11425	Faecalibacterium prausnitzii	Species	Faecalibacterium prausnitzii	97.79	96.18	Faecalibacterium	97.79	96.18	Faecalibacterium prausnitzii	94.99
M010	11090	Faecalibacterium prausnitzii	Species	Faecalibacterium prausnitzii	83.26	86.29	Faecalibacterium	83.26	86.29	Faecalibacterium prausnitzii	90.23
M011	4177	Faecalibacterium prausnitzii	Species	Faecalibacterium prausnitzii	79.39	85.33	Faecalibacterium	79.39	85.33	Faecalibacterium prausnitzii	90.09
M012	941	Faecalibacterium prausnitzii	Species	Faecalibacterium prausnitzii	77.9	85.71	Faecalibacterium	77.9	85.71	Faecalibacterium prausnitzii	88.33
M013	11474	Faecalibacterium prausnitzii	Species	Faecalibacterium prausnitzii	95.01	97.09	Faecalibacterium	95.01	97.09	Faecalibacterium prausnitzii	95.29
M014	10997	Faecalibacterium prausnitzii	Species	Faecalibacterium prausnitzii	96.45	97.4	Faecalibacterium	96.45	97.4	Faecalibacterium prausnitzii	95.96
M015	5785	Faecalibacterium prausnitzii	Species	Faecalibacterium prausnitzii	96.2	97.35	Faecalibacterium	96.2	97.35	Faecalibacterium prausnitzii	94.39
M016	713	Faecalibacterium prausnitzii	Species	Faecalibacterium prausnitzii	90.46	97.09	Faecalibacterium	90.46	97.09	Faecalibacterium prausnitzii	96.18
M017	2857	Faecalibacterium prausnitzii	Species	Faecalibacterium prausnitzii	91.25	90.43	Faecalibacterium	91.25	90.43	Faecalibacterium prausnitzii	91.92
M018	4063	Faecalibacterium prausnitzii	Species	Faecalibacterium prausnitzii	82.21	84.11	Faecalibacterium	82.21	84.11	Faecalibacterium prausnitzii	90.38
M019	2834	Faecalibacterium prausnitzii	Species	Faecalibacterium prausnitzii	71.24	85.13	Faecalibacterium	71.24	85.13	Faecalibacterium prausnitzii	91.1
M020	1817	Faecalibacterium prausnitzii	Species	Faecalibacterium prausnitzii	73.09	83.85	Faecalibacterium	73.09	83.85	Faecalibacterium prausnitzii	93.93
M021	7595	Unclassified	NA	Flavonifractor plautii	6.5	77.85	Flavonifractor	6.5	77.85	-	-
M022	2674	Unclassified	NA	Flavonifractor plautii	7.63	77.09	Flavonifractor	7.63	77.09	-	-
M023	1332	Unclassified	NA	Flavonifractor plautii	6.08	78.83	Flavonifractor	6.08	78.83	-	-
M024	2876	Oscillibacter	Genus	Oscillibacter sp. PEA192	13.21	79.65	Oscillibacter	14.74	79.38	Oscillibacter valericigenes	76.94
M025	1477	Unclassified	NA	Flavonifractor plautii	2.64	75.86	Flavonifractor	2.64	75.86	-	-
M026	839	Unclassified	NA	Christensenella sp. Marseille-P3954	1.19	77.54	uncultured bacterium	1.43	78.71	-	-
M027	3026	Unclassified	NA	Flavonifractor plautii	9.02	77.52	Flavonifractor	9.02	77.52	-	-
M028	2822	Flavonifractor	Genus	Flavonifractor plautii	19.77	78.84	Flavonifractor/Intestinimonas	28.6	78.84	unnamed Ruminococcaceae bacterium D16	78.11
M029	740	Unclassified	NA	Victivallales bacterium CCUG 44730	1.76	77.09	Victivallales	1.76	77.09	-	-
M030	2763	Unclassified	NA	Flavonifractor plautii	7.53	77.07	Flavonifractor	7.53	77.07	-	-
M031	3292	Unclassified	NA	Flavonifractor plautii	6.62	76.77	Flavonifractor	6.62	76.77	-	-
M032	2417	Unclassified	NA	Flavonifractor plautii	4.68	76.85	Flavonifractor	4.68	76.85	-	-
M033	4021	Unclassified	NA	Flavonifractor plautii	5.84	77.01	Flavonifractor	5.84	77.01	unnamed Ruminococcaceae bacterium D16	70.6
M034	5440	Oscillibacter	Genus	Oscillibacter valericigenes	13.22	77.35	Oscillibacter	13.22	77.35	Oscillibacter valericigenes	75.75
M035	2514	Eubacterium biforme	Species	Faecalitalea cylindroides	17.26	77.64	Faecalitalea	17.26	77.64	Eubacterium biforme	95.29
M036	1760	Eubacterium biforme	Species	Faecalitalea cylindroides	14.72	77.79	Faecalitalea	14.72	77.79	Eubacterium biforme	96.42
M037	3811	Unclassified	NA	Flavonifractor plautii	7.24	76.4	Flavonifractor	7.24	76.4	Subdoligranulum variabile	65.19
M038	925	Unclassified	NA	Flavonifractor plautii	5.19	76.76	Flavonifractor	5.19	76.76	-	-
M039	1559	Unclassified	NA	Flavonifractor plautii	5.39	77.17	Flavonifractor	5.39	77.17	-	-
M040	3650	Unclassified	NA	Flavonifractor plautii	5.75	76.9	Flavonifractor	5.75	76.9	-	-
M041	1001	Unclassified	NA	Flavonifractor plautii	3.2	75.97	Flavonifractor	3.2	75.97	-	-
M042	3354	Unclassified	NA	Flavonifractor plautii	3.64	75.86	Flavonifractor	3.64	75.86	-	-
M043	8919	Unclassified	NA	Oscillibacter valericigenes	14.33	77.41	Oscillibacter	14.33	77.41	Pseudoflavonifractor capillosus	74.37
M044	4470	Unclassified	NA	Flavonifractor plautii	8.93	78.02	Flavonifractor	8.93	78.02	-	-
M045	6757	Unclassified	NA	Flavonifractor plautii	8.27	76.89	Flavonifractor	8.27	76.89	-	-
M046	3939	Oscillibacter	Genus	Oscillibacter sp. PEA192	16.2	79.78	Oscillibacter	18.71	79.63	Oscillibacter valericigenes	76.11
M047	3346	Oscillibacter	Genus	Oscillibacter valericigenes	31.26	77.93	Oscillibacter	32.58	81.02	Oscillibacter valericigenes	79.72
M048	5406	Pseudoflavonifractor	Genus	Oscillibacter sp. PEA192	15.82	80.77	Oscillibacter	17.8	80.52	Pseudoflavonifractor capillosus	76.26
M049	1132	Oscillibacter	Genus	Oscillibacter sp. PEA192	17.58	79.96	Oscillibacter	19.7	79.83	Oscillibacter valericigenes	79.16
M050	2340	Unclassified	NA	Eubacterium siraeum	2.18	75.84	Ruminococcus	2.91	75.51	-	-
M051	5634	Flavonifractor	Genus	Clostridiales bacterium CCNA10	45.07	84.34	Clostridiales	45.07	84.34	unnamed Ruminococcaceae bacterium D16	88.32
M052	2214	Oscillibacter	Genus	Oscillibacter sp. PEA192	68.38	88.29	Oscillibacter	68.47	88.28	Oscillibacter valericigenes	80.19
M053	3416	Clostridium	Genus	Mordavella sp. Marseille-P3756	11.74	81.25	Mordavella	11.74	81.25	Clostridium scindens	82.26
M054	1427	Unclassified	NA	Flavonifractor plautii	2.03	77.12	Flavonifractor	2.03	77.12	-	-
M055	725	Unclassified	NA	Flavonifractor plautii	4.83	77.55	uncultured bacterium	5.38	78.15	-	-
M056	3113	Unclassified	NA	Lachnospiraceae bacterium GAM79	7.81	79.32	Roseburia	9.57	77.21	unnamed Lachnospiraceae bacterium 3_1_57FAA_CT1	74.52
M057	2757	Unclassified	NA	Flavonifractor plautii	6.13	76.95	Flavonifractor	6.13	76.95	-	-
M058	4166	Unclassified	NA	Flavonifractor plautii	10.2	77.85	Flavonifractor	10.2	77.85	-	-
M059	2205	Alistipes shahii	Species	Alistipes shahii	57.19	87.22	Alistipes	64.13	86.75	Alistipes shahii	91.9
M060	3606	Unclassified	NA	Flavonifractor plautii	1.5	76.38	Flavonifractor	1.5	76.38	-	-
M061	5976	Unclassified	NA	Faecalibacterium prausnitzii	0.89	79.71	Ruminococcus	1.04	76.22	-	-
M062	2456	Unclassified	NA	Flavonifractor plautii	2.85	76.28	Flavonifractor	2.85	76.28	-	-
M063	1840	Unclassified	NA	Flavonifractor plautii	2.61	77.7	Flavonifractor	2.61	77.7	-	-
M064	2456	Unclassified	NA	Oscillibacter valericigenes	0.61	75.52	Oscillibacter	0.61	75.52	-	-
M065	2306	Unclassified	NA	Flavonifractor plautii	7.24	76.24	Flavonifractor	7.24	76.24	-	-
M066	811	Unclassified	NA	Blautia obeum	6.29	78.35	Blautia	9.62	78.22	-	-
M067	1496	Marvinbryantia	Genus	Blautia obeum	6.08	77.47	Blautia	9.96	77.41	Marvinbryantia formatexigens	76.48
M068	2591	Unclassified	NA	Flavonifractor plautii	3.86	77.29	Flavonifractor	3.86	77.29	-	-
M069	2625	Unclassified	NA	Flavonifractor plautii	10.06	76.66	Flavonifractor	10.06	76.66	Pseudoflavonifractor capillosus	73.53
M070	923	Flavonifractor	Genus	Clostridiales bacterium CCNA10	30.99	82.46	Clostridiales	30.99	82.46	unnamed Ruminococcaceae bacterium D16	85.5
M071	1927	Unclassified	NA	Clostridium propionicum	18.21	76.21	Clostridium	18.79	76.27	-	-
M072	1034	Clostridium	Genus	Clostridium propionicum	29.5	77.8	Clostridium	30.56	77.89	-	-
M073	2600	Blautia	Genus	Blautia sp. YL58	7.85	76.45	Blautia	11.23	76.96	Blautia hydrogenotrophica	73.73
M074	3554	Clostridium	Genus	Clostridium propionicum	20.68	76.61	Clostridium	21.3	76.63	-	-
M075	3478	Unclassified	NA	Flavonifractor plautii	3.68	77.4	Flavonifractor	3.68	77.4	-	-
M076	996	Roseburia	Genus	Roseburia hominis	9.54	77.25	Roseburia	11.95	77.38	Eubacterium rectale	73.75
M077	5475	Butyricimonas faecalis	Species	Butyricimonas faecalis	98.39	99.26	Butyricimonas	98.39	99.26	-	-
M078	2439	Oscillibacter	Genus	Oscillibacter valericigenes	15.42	77.18	Oscillibacter	15.42	77.18	Oscillibacter valericigenes	76.66
M079	984	Unclassified	NA	Oscillibacter valericigenes	0.51	75.35	Ruminococcus	0.61	81.07	-	-
M080	2487	Unclassified	NA	uncultured bacterium	11.42	94.59	uncultured bacterium	12.06	93.64	-	-
M081	2043	Prevotella	Genus	Prevotella dentalis	7.59	75.82	Prevotella	29.66	76.45	Prevotella copri	85.75
M082	2646	Olsenella	Genus	Olsenella sp. GAM18	44.03	97.19	Olsenella	44.52	97.02	Olsenella uli	80.07
M083	5210	Phascolarctobacterium succinatutens	Species	Acidaminococcus fermentans	4.09	75.54	Acidaminococcus	6.07	75.56	Phascolarctobacterium succinatutens	97.2
M084	1100	Prevotella	Genus	uncultured bacterium	12.64	87.17	Prevotella	24.45	77.99	Prevotella copri	89.42
M085	1727	Prevotella	Genus	uncultured bacterium	9.55	86.77	Prevotella	33.47	77.64	Prevotella copri	73.84
M086	1711	Unclassified	NA	Eubacterium rectale	1.69	86.49	Bacteroides	4.38	80.46	-	-
M087	1243	Unclassified	NA	Clostridium saccharolyticum	12.31	76.48	Clostridium	12.55	77.24	-	-
M088	3936	Clostridium	Genus	Clostridium saccharolyticum	15.12	77.11	Clostridium	15.5	77.06	Clostridium bolteae	77.75
M089	1498	Enterobacter cloacae	Species	Enterobacter cloacae	55.54	98.51	Enterobacter	97.26	98.86	Enterobacter hormaechei/cloacae	94.19
M090	1803	Citrobacter freundii	Species	Citrobacter freundii	92.79	95.91	Citrobacter	95.67	95.82	unnamed Citrobacter sp. 30_2	95.2
M091	2999	Enterococcus gallinarum	Species	Enterococcus gallinarum/casseliflavus	89.8	95.75	Enterococcus	95.3	98.33	Enterococcus casseliflavus	98.23
M092	714	Klebsiella michiganensis	Species	Klebsiella michiganensis	73.67	98.8	Klebsiella	98.04	99.02	Klebsiella oxytoca	99.52
M093	1304	Klebsiella variicola	Species	Klebsiella variicola	89.95	99.42	Klebsiella	98.7	99.34	Klebsiella variicola/pneumoniae	96.45
M094	9295	Klebsiella pneumoniae	Species	Klebsiella pneumoniae	95.74	99.21	Klebsiella	97.24	99.27	Klebsiella variicola/pneumoniae	88.65
M095	13131	Escherichia coli	Species	Escherichia coli	96.98	99.25	Escherichia	97.05	99.25	Escherichia coli	99.99
M096	2688	Escherichia coli	Species	Escherichia coli	98.62	99.42	Escherichia	98.81	99.41	Escherichia coli	99.99
M097	1794	Escherichia coli	Species	Escherichia coli	95.6	99.29	Escherichia	95.65	99.28	Escherichia coli	99.99
M098	2162	Escherichia coli	Species	Escherichia coli	97.78	99.44	Escherichia	97.83	99.44	Escherichia coli	99.99
M099	781	Escherichia coli	Species	Escherichia coli	98.21	99.68	Escherichia	98.21	99.68	Escherichia coli	99.99
M100	6146	Lactobacillus rhamnosus	Species	Lactobacillus rhamnosus/johnsonii	62.87	99.05	Lactobacillus	77.77	99.09	Escherichia coli	99.99
M101	1842	Lactobacillus gasseri	Species	Lactobacillus gasseri	83.5	93.59	Lactobacillus	96.53	98.68	Lactobacillus gasseri	96
M102	6121	Ruminococcus	Genus	Ruminococcus bromii	40.12	79.76	Ruminococcus	40.81	79.78	Ruminococcus bromii	82.94
M103	1273	Veillonella parvula	Species	Veillonella parvula	94.74	95.47	Veillonella	96.62	96.97	Veillonella parvula	95.35
M104	862	Veillonella atypica	Species	Veillonella atypica	93.74	96.35	Veillonella	96.87	96.15	Veillonella atypica	97.26
M105	2438	Clostridium	Genus	Clostridium perfringens	32.69	78.51	Clostridium	51.56	78.03	Clostridium perfringens	83.5
M106	1726	Clostridium	Genus	Clostridium botulinum	5.85	76.2	Clostridium	14.77	75.81	-	-
M107	9489	Prevotella copri	Species	uncultured bacterium	16.05	94.61	Prevotella	32.6	78.8	Prevotella copri	93.26
M108	4464	Bacteroides clarus	Species	Bacteroides helcogenes	25.74	80.31	Bacteroides	63.04	79.86	Bacteroides clarus	97.75
M109	924	Bacteroides eggerthii	Species	Bacteroides helcogenes	28.46	81.45	Bacteroides	67.97	81.23	Bacteroides eggerthii	93.89
M110	10343	Bacteroides stercoris	Species	Bacteroides helcogenes	26.88	80.94	Bacteroides	65.64	81.1	Bacteroides stercoris	96.08
M111	961	Bacteroides stercoris	Species	Bacteroides helcogenes	30.49	81.18	Bacteroides	70.14	80.91	Bacteroides stercoris	93.86
M112	1907	Bacteroides cellulosilyticus	Species	Bacteroides cellulosilyticus	56	86.57	Bacteroides	63.71	85.74	Bacteroides intestinalis	73.02
M113	1917	Bacteroides cellulosilyticus	Species	Bacteroides cellulosilyticus	66.51	87.61	Bacteroides	73.55	86.98	Bacteroides intestinalis	80.94
M114	725	Bacteroides cellulosilyticus	Species	Bacteroides cellulosilyticus	74.21	87.32	Bacteroides	81.24	86.69	Bacteroides intestinalis	95.11
M115	10595	Bacteroides	Genus	Bacteroides fragilis	20.21	80.32	Bacteroides	50.22	79.64	Bacteroides fragilis	83.84
M116	5042	Bacteroides finegoldii	Species	Bacteroides ovatus	22.77	85.73	Bacteroides	68.68	85.22	Bacteroides finegoldii	95.97
M117	977	Bacteroides finegoldii	Species	Bacteroides ovatus	15.46	86.44	Bacteroides	43.6	82.78	Bacteroides finegoldii	90.13
M118	7494	Bacteroides ovatus	Species	Bacteroides ovatus	85.25	97.88	Bacteroides	93.81	97.45	Bacteroides ovatus	94.97
M119	2423	Bacteroides cellulosilyticus	Species	Bacteroides cellulosilyticus	89.56	96.13	Bacteroides	92.65	95.71	Bacteroides intestinalis	93.62
M120	1376	Bacteroides cellulosilyticus	Species	Bacteroides cellulosilyticus	64.68	89.6	Bacteroides	71.66	88.51	Bacteroides intestinalis	93.94
M121	1519	Bacteroides cellulosilyticus	Species	Bacteroides cellulosilyticus	86.44	97.41	Bacteroides	88.35	97.03	Bacteroides intestinalis	92.41
M122	1347	Bacteroides cellulosilyticus	Species	Bacteroides cellulosilyticus	91.02	96.44	Bacteroides	92.87	96.13	Bacteroides intestinalis	86.52
M123	11175	Bacteroides thetaiotaomicron	Species	Bacteroides thetaiotaomicron	94.75	97.63	Bacteroides	96.54	97.43	Bacteroides thetaiotaomicron	94.52
M124	1889	Bacteroides thetaiotaomicron	Species	Bacteroides thetaiotaomicron	93.33	97.01	Bacteroides	95.98	96.74	Bacteroides thetaiotaomicron	89.42
M125	3473	Bacteroides cellulosilyticus	Species	Bacteroides cellulosilyticus	73.28	87.65	Bacteroides	80.22	87.05	Bacteroides intestinalis	87.26
M126	1264	Bacteroides cellulosilyticus	Species	Bacteroides cellulosilyticus	61.31	86.93	Bacteroides	70.81	85.93	Bacteroides intestinalis	86.44
M127	1092	Bacteroides cellulosilyticus	Species	Bacteroides cellulosilyticus	58.15	87.22	Bacteroides	68.04	86.17	Bacteroides intestinalis	98.22
M128	946	Bacteroides cellulosilyticus	Species	Bacteroides cellulosilyticus	48.84	87.91	Bacteroides	57.93	86.32	-	-
M129	5378	Bacteroides cellulosilyticus	Species	Bacteroides cellulosilyticus	94.07	97.59	Bacteroides	95.37	97.36	Bacteroides intestinalis	81.06
M130	973	Bacteroides cellulosilyticus	Species	Bacteroides cellulosilyticus	79.55	95.36	Bacteroides	82.73	94.74	Bacteroides intestinalis	66.53
M131	6093	Bacteroides eggerthii	Species	Bacteroides helcogenes	26.75	80.37	Bacteroides	64.8	80.21	Bacteroides eggerthii	96.69
M132	13660	Bacteroides caccae	Species	Bacteroides caccae	92.48	98.19	Bacteroides	94.56	97.97	Bacteroides caccae	96.65
M133	4903	Bacteroides xylanisolvens	Species	Bacteroides xylanisolvens	82.87	97.86	Bacteroides	94.49	97.42	Bacteroides xylanisolvens	94.63
M134	916	Bacteroides xylanisolvens	Species	Bacteroides xylanisolvens/ovatus	61.14	97.56	Bacteroides	97.27	97.69	Bacteroides ovatus	91.31
M135	2635	Bacteroides xylanisolvens	Species	Bacteroides xylanisolvens/ovatus	55.67	96.88	Bacteroides	95.94	97.18	Bacteroides xylanisolvens	94.03
M136	1345	Bacteroides ovatus	Species	Bacteroides ovatus	62.83	97.59	Bacteroides	95.32	97.26	Bacteroides xylanisolvens	93.46
M137	6892	Bacteroides dorei	Species	Bacteroides dorei	92.4	98.86	Bacteroides	96.36	98.57	Bacteroides dorei/vulgatus	92.59
M138	2393	Bacteroides dorei	Species	Bacteroides dorei	77.98	98.36	Bacteroides	97.45	98.25	Bacteroides dorei/vulgatus	90.99
M139	1849	Bacteroides vulgatus	Species	Bacteroides vulgatus	86.8	99.14	Bacteroides	96.92	98.58	Bacteroides dorei/vulgatus	92.74
M140	17874	Bacteroides vulgatus	Species	Bacteroides vulgatus	91.28	99.2	Bacteroides	97.55	98.68	Bacteroides dorei/vulgatus	95.8
M141	7411	Bacteroides	Genus	Bacteroides dorei	44.35	81.62	Bacteroides	68.4	81.34	Bacteroides dorei/vulgatus	86.43
M142	4336	Bacteroides dorei	Species	Bacteroides dorei	91.84	99.08	Bacteroides	96.03	98.82	Bacteroides dorei/vulgatus	94.07
M143	9115	Bacteroides plebeius	Species	Bacteroides salanitronis	19.19	78.7	Bacteroides	47.07	78.8	Bacteroides plebeius	96.09
M144	710	Bacteroides plebeius	Species	Bacteroides salanitronis	17.32	77.95	Bacteroides	43.66	78.48	Bacteroides plebeius	94.81
M145	4854	Bacteroides coprocola	Species	Bacteroides salanitronis	24.82	78.28	Bacteroides	54.14	78.64	Bacteroides coprocola	98.96
M146	2620	Prevotella	Genus	uncultured bacterium	6.07	85.05	Prevotella	20.89	76.94	Prevotella copri	67.85
M147	3259	Bacteroides coprophilus	Species	Bacteroides salanitronis	21.39	77.8	Bacteroides	50.94	77.95	Bacteroides coprophilus	99.51
M148	12028	Bacteroides fragilis	Species	Bacteroides fragilis	94.45	98.27	Bacteroides	95.54	98.13	Bacteroides fragilis	98.23
M149	5377	Bacteroides fragilis	Species	Bacteroides fragilis	90.76	97.82	Bacteroides	91.69	97.69	Bacteroides fragilis	98.68
M150	7111	Odoribacter splanchnicus	Species	Odoribacter splanchnicus	94.23	98.88	Odoribacter	94.23	98.88	Odoribacter splanchnicus	96.98
M151	914	Odoribacter	Genus	Odoribacter splanchnicus	23.09	93	Odoribacter	23.09	93	-	-
M152	840	Odoribacter splanchnicus	Species	Odoribacter splanchnicus	86.31	98.21	Odoribacter	86.31	98.21	Odoribacter splanchnicus	88.21
M153	3631	Butyricimonas	Genus	Butyricimonas faecalis	63.1	89.61	Butyricimonas	63.12	89.61	-	-
M154	733	Butyricimonas	Genus	Butyricimonas faecalis	68.49	89.75	Butyricimonas	68.49	89.75	-	-
M155	830	Butyricimonas	Genus	Butyricimonas faecalis	72.65	89.27	Butyricimonas	72.65	89.27	-	-
M156	2880	Butyricimonas	Genus	Butyricimonas faecalis	45.24	87.99	Butyricimonas	45.24	87.99	-	-
M157	5564	Eubacterium	Genus	Eubacterium siraeum	9.94	78.07	Eubacterium	10.1	78.07	-	-
M158	7507	Eubacterium siraeum	Species	Eubacterium siraeum	92.15	96.58	Eubacterium	92.21	96.57	Eubacterium siraeum	97.86
M159	1154	Butyricimonas	Genus	Butyricimonas faecalis	40.12	86.75	Butyricimonas	40.12	86.75	-	-
M160	5536	Alistipes	Genus	Alistipes shahii	25.96	80.35	Alistipes	49.77	80.21	unnamed Alistipes sp. HGB5	83.46
M161	10273	Alistipes shahii	Species	Alistipes shahii	92.9	97.4	Alistipes	94.94	97.17	Alistipes shahii	94.69
M162	12449	Alistipes finegoldii	Species	Alistipes finegoldii	59.76	85.8	Alistipes	74.51	85.94	unnamed Alistipes sp. HGB5	89.34
M163	5035	Alistipes finegoldii	Species	Alistipes finegoldii	93.21	97.5	Alistipes	94.36	97.35	unnamed Alistipes sp. HGB5	98.49
M164	1189	Alistipes finegoldii	Species	Alistipes finegoldii	62.91	95.99	Alistipes	65.35	95.45	unnamed Alistipes sp. HGB5	89.42
M165	865	Alistipes shahii	Species	Alistipes finegoldii/shahii	43.47	85.33	Alistipes	43.47	84.56	unnamed Alistipes sp. HGB5	85.99
M166	1376	Alistipes shahii	Species	Alistipes shahii	59.38	91.38	Alistipes	88.15	89.79	Alistipes shahii	89.47
M167	716	Alistipes shahii	Species	Alistipes shahii	83.66	96.4	Alistipes	96.37	96.02	Alistipes shahii	93.71
M168	8386	Alistipes putredinis	Species	Alistipes finegoldii	26.5	80.86	Alistipes	47.77	81.47	Alistipes putredinis	97.29
M169	997	Alistipes shahii	Species	Alistipes shahii	83.65	98.17	Alistipes	86.26	98.02	Alistipes shahii	97.66
M170	10883	Parabacteroides merdae	Species	Parabacteroides distasonis	34.76	78.54	Parabacteroides	34.77	78.54	Parabacteroides merdae	98.71
M171	2451	Parabacteroides merdae	Species	Parabacteroides distasonis	33.7	77.8	Parabacteroides	33.74	77.8	Parabacteroides merdae	91.89
M172	6262	Parabacteroides distasonis	Species	Parabacteroides distasonis	94.27	97.43	Parabacteroides	94.28	97.42	Parabacteroides distasonis	94.25
M173	902	Parabacteroides distasonis	Species	Parabacteroides distasonis	75.39	96.42	Parabacteroides	79.27	97.56	Parabacteroides distasonis	96.27
M174	3221	Parabacteroides distasonis	Species	Parabacteroides distasonis	94.44	97.8	Parabacteroides	95.9	98.64	Parabacteroides distasonis	94.02
M175	1028	Parabacteroides distasonis	Species	Parabacteroides distasonis	84.14	97.52	Parabacteroides	91.73	98.79	Parabacteroides distasonis	90.32
M176	16830	Bacteroides uniformis	Species	Bacteroides helcogenes	32.44	81.46	Bacteroides	63.67	81.48	Bacteroides uniformis	96.19
M177	757	Bacteroides uniformis	Species	Bacteroides helcogenes	28.53	82.13	Bacteroides	60.24	82.33	Bacteroides uniformis	93.76
M178	715	Bacteroides uniformis	Species	Bacteroides helcogenes	32.45	81.04	Bacteroides	63.22	80.51	Bacteroides uniformis	90.09
M179	1348	Bacteroides thetaiotaomicron	Species	Bacteroides thetaiotaomicron	91.47	99	Bacteroides	93.92	98.08	Bacteroides thetaiotaomicron	99.07
M180	5475	Bacteroides thetaiotaomicron	Species	Bacteroides thetaiotaomicron	73.7	88.69	Bacteroides	80.95	88.05	Bacteroides thetaiotaomicron	90.85
M181	7682	Barnesiella	Genus	Barnesiella viscericola	43.73	79.1	Barnesiella	43.73	79.1	Parabacteroides merdae	73.27
M182	6570	Paraprevotella xylaniphila	Species	Paraprevotella xylaniphila	79.45	92.83	Paraprevotella	79.45	92.83	Paraprevotella xylaniphila	94.97
M183	3877	Bacteroides	Genus	Bacteroides ovatus	21.8	85.41	Bacteroides	72.48	85.71	Bacteroides ovatus	81.4
M184	1389	Prevotella	Genus	uncultured bacterium	16.27	96.46	Prevotella	29.66	78.22	Prevotella copri	88.87
M185	2967	Prevotella	Genus	uncultured bacterium	7.79	83.62	Prevotella	32.76	76.73	Prevotella copri	76.53
M186	1094	Prevotella copri	Species	uncultured bacterium	17.09	93	Prevotella	31.35	78.51	Prevotella copri	90.13
M187	2153	Slackia	Genus	Slackia heliotrinireducens	12.63	77.56	Slackia	13.01	78.06	Slackia heliotrinireducens	76.79
M188	1226	Eggerthella	Genus	Eggerthella lenta	28.47	80.38	Eggerthella	30.26	80.31	Eggerthella lenta	77.23
M189	848	Eggerthella	Genus	Eggerthella lenta	29.01	79.36	Eggerthella	30.54	79.43	Eggerthella lenta	84.23
M190	1599	Victivallis vadensis	Species	Victivallales bacterium CCUG 44730	25.39	80.9	Victivallales	25.39	80.9	Victivallis vadensis	99.1
M191	3343	Victivallales bacterium CCUG 44730	Species	Victivallales bacterium CCUG 44730	93.75	98.35	Victivallales	93.75	98.35	Victivallis vadensis	82.74
M192	3750	Unclassified	NA	Lachnospiraceae bacterium GAM79	7.12	78.88	Roseburia	9.31	77.07	unnamed Lachnospiraceae bacterium 3_1_57FAA_CT1	74.44
M193	1097	Unclassified	NA	Clostridium botulinum	1.28	74.62	Clostridium	2.83	74.21	-	-
M194	2525	Unclassified	NA	Ruminococcus champanellensis	1.03	77.72	Ruminococcus	1.98	77.82	-	-
M195	1387	Dialister	Genus	Dialister sp. Marseille-P5638	15	80.83	Dialister	15.07	80.78	-	-
M196	1111	Unclassified	NA	Paeniclostridium sordellii	0.81	75.25	Clostridium	3.24	75.69	-	-
M197	770	Eubacterium biforme	Species	Faecalitalea cylindroides	9.35	78.44	Faecalitalea	9.35	78.44	Eubacterium biforme	98.51
M198	2905	Unclassified	NA	Ethanoligenens harbinense	5.16	75.74	Ethanoligenens	5.16	75.74	-	-
M199	2355	Unclassified	NA	Lachnospiraceae bacterium GAM79	9.3	79.26	Lachnospiraceae	9.6	79.16	unnamed Lachnospiraceae bacterium 3_1_57FAA_CT1	76.56
M200	1621	Oscillibacter	Genus	Oscillibacter valericigenes	17.58	76.99	Oscillibacter	17.77	79.12	Oscillibacter valericigenes	75.11
M201	1618	Oscillibacter	Genus	Oscillibacter valericigenes	11.19	76.92	Oscillibacter	11.68	79.58	Oscillibacter valericigenes	76.41
M202	1916	Unclassified	NA	Oscillibacter valericigenes	16.6	77.23	Oscillibacter	16.96	78.9	-	-
M203	2441	Prevotella	Genus	Prevotella dentalis	12.62	76.34	Prevotella	41.46	77.33	Prevotella copri	86.24
M204	2681	Unclassified	NA	Escherichia coli	2.72	98.45	Escherichia	2.95	98.24	-	-
M205	1202	Unclassified	NA	Ruminiclostridium thermocellum	1.16	76.21	Ruminiclostridium	1.33	75.75	-	-
M206	4620	Unclassified	NA	Christensenella sp. Marseille-P3954	1.69	76.71	uncultured bacterium	2.27	77.86	-	-
M207	3887	Unclassified	NA	Intestinimonas butyriciproducens	2.03	81.44	Intestinimonas	2.03	81.44	-	-
M208	3525	Unclassified	NA	Faecalibacterium prausnitzii	4.88	77.81	Faecalibacterium	4.88	77.81	-	-
M209	1515	Unclassified	NA	Faecalibacterium prausnitzii	1.32	77.12	Ruminococcus	1.52	75.96	-	-
M210	1812	Flavonifractor	Genus	Flavonifractor plautii	25.28	78.66	Flavonifractor	25.28	78.66	Pseudoflavonifractor capillosus	77.77
M211	1399	Roseburia	Genus	Roseburia intestinalis	4.93	78.23	Roseburia	7.01	78.54	unnamed Lachnospiraceae bacterium 3_1_57FAA_CT1	78.57
M212	2552	Anaerotruncus	Genus	Flavonifractor plautii	4.82	76.82	Flavonifractor	4.82	76.82	Anaerotruncus colihominis	82.61
M213	2065	Unclassified	NA	Blautia sp. YL58	5.71	77.11	Blautia	6.92	77.13	-	-
M214	2310	Unclassified	NA	Ruminococcus champanellensis	2.03	74.45	Ruminococcus	4.03	74.24	-	-
M215	813	Unclassified	NA	Clostridium propionicum	1.85	76.39	Clostridium	2.46	75.62	-	-
M216	1368	Ruminiclostridium	Genus	Ruminiclostridium sp. KB18	36.18	77.61	Ruminiclostridium	36.18	77.61	Bacteroides thetaiotaomicron	53.56
M217	1492	Ruminiclostridium	Genus	Ruminiclostridium sp. KB18	34.79	77.76	Ruminiclostridium	34.79	77.76	Clostridium leptum	72.61
M218	1065	Unclassified	NA	Paeniclostridium sordellii	0.85	74.71	Clostridium	2.44	74.43	-	-
M219	2622	Faecalibacterium	Genus	Faecalibacterium prausnitzii	37.15	78.86	Faecalibacterium	37.15	78.86	Faecalibacterium prausnitzii	79.4
M220	5414	Ruminococcus	Genus	Ruminococcus champanellensis	17.42	77.82	Ruminococcus	26.84	80.24	-	-
M221	5886	Ruminococcus	Genus	Ruminococcus champanellensis	13.83	77.44	Ruminococcus	16.56	77.5	Ruminococcus champanellensis	75.94
M222	6514	Ruminococcus	Genus	Ruminococcus champanellensis	9.1	77.36	Ruminococcus	12.51	77.86	Ruminococcus champanellensis	73.03
M223	7236	Clostridium	Genus	Coprococcus sp. ART55/1	10.13	78.59	Coprococcus	11.97	78.65	unnamed Clostridium sp. L2-50	74.13
M224	7172	Ruminococcus bicirculans	Species	Ruminococcus bicirculans	92.69	97	Ruminococcus	93.4	96.94	Ruminococcus albus	73.59
M225	8467	Ruminococcus bromii	Species	Ruminococcus bromii	87.28	96.83	Ruminococcus	87.56	96.81	Ruminococcus bromii	96.79
M226	1433	Unclassified	NA	Escherichia coli	1.19	92.03	Bacteroides	1.88	86.11	-	-
M227	3017	Prevotella	Genus	Prevotella dentalis	7.99	76.03	Prevotella	21.31	76.53	Prevotella ruminicola	76.83
M228	2220	Unclassified	NA	Flavonifractor plautii	6.71	75.85	Flavonifractor	6.71	75.85	unnamed Ruminococcaceae bacterium D16	70.32
M229	1182	Unclassified	NA	Ruminococcus bromii	1.78	77.3	Ruminococcus	3.3	77.05	-	-
M230	1565	Unclassified	NA	Mycoplasma mycoides	0.7	73.32	Clostridium	1.92	73.95	-	-
M231	1786	Unclassified	NA	Bacteroides dorei	2.86	95.72	Bacteroides	3.47	93.39	Enterobacter hormaechei/cloacae	71.96
M232	3796	Desulfovibrio	Genus	Desulfovibrio vulgaris	8.77	76.54	Desulfovibrio	17.52	76.56	Desulfovibrio piger	74.39
M233	3983	Prevotella copri	Species	uncultured bacterium	17.02	94.28	Prevotella	33.34	78.08	Prevotella copri	95.04
M234	8957	Blautia	Genus	Blautia sp. YL58	3.26	76.31	Blautia	4.57	76.25	Blautia hansenii	72.04
M235	3465	Unclassified	NA	Faecalibacterium prausnitzii	4.33	78.1	Faecalibacterium	4.33	78.1	-	-
M236	2999	Unclassified	NA	Faecalibacterium prausnitzii	3.7	76.79	Faecalibacterium	3.7	76.79	-	-
M237	10338	Unclassified	NA	Faecalibacterium prausnitzii	2.56	77.95	uncultured bacterium	4.18	80.74	-	-
M238	1057	Unclassified	NA	Clostridium botulinum	3.22	75.33	Clostridium	10.5	74.88	-	-
M239	1404	Unclassified	NA	Clostridium botulinum	4.27	75.74	Clostridium	12.61	75.24	-	-
M240	2282	Unclassified	NA	Clostridium botulinum	3.81	75.83	Clostridium	9.9	75.36	-	-
M241	2487	Unclassified	NA	Clostridium botulinum	3.54	75.37	Clostridium	10.82	75.63	-	-
M242	2482	Unclassified	NA	Clostridium botulinum	2.98	76.31	Clostridium	10.23	76.22	-	-
M243	4179	Unclassified	NA	Clostridium botulinum	4.09	75.95	Clostridium	11.68	76	-	-
M244	4336	Unclassified	NA	Clostridium botulinum	1.91	75.68	Clostridium	7.84	75.53	-	-
M245	1518	Unclassified	NA	Clostridium botulinum	4.02	76.3	Clostridium	12.38	75.87	-	-
M246	812	Unclassified	NA	Clostridium botulinum	1.72	75.98	Clostridium	5.91	75.62	-	-
M247	1409	Unclassified	NA	Clostridium botulinum	4.54	75.1	Clostridium	11.85	75.21	-	-
M248	1465	Unclassified	NA	Clostridium botulinum	4.23	75.86	Clostridium	12.76	75.84	-	-
M249	1954	Unclassified	NA	Eubacterium sulci	5.22	76	Eubacterium	6.81	76.22	-	-
M250	786	Unclassified	NA	Butyrivibrio proteoclasticus	0.38	78.47	Butyrivibrio	0.51	76.89	-	-
M251	1891	Flavonifractor	Genus	Clostridiales bacterium CCNA10	36.86	83.12	Clostridiales	36.86	83.12	unnamed Ruminococcaceae bacterium D16	86.16
M252	2585	Unclassified	NA	Flavonifractor plautii	1.66	75.98	Flavonifractor	1.66	75.98	-	-
M253	1588	Parabacteroides	Genus	Parabacteroides distasonis	20.15	77.19	Parabacteroides	20.15	77.19	-	-
M254	2143	Parabacteroides	Genus	Parabacteroides distasonis	24.17	77.93	Parabacteroides	24.17	77.93	Parabacteroides merdae	68.06
M255	3881	Desulfovibrio piger	Species	Desulfovibrio piger	82.35	93.9	Desulfovibrio	82.74	93.83	Desulfovibrio piger	97.59
M256	812	Parabacteroides	Genus	Parabacteroides distasonis	19.09	78.11	Parabacteroides/Bacteroides	28.2	78.11	Parabacteroides merdae	82.67
M257	5504	Unclassified	NA	Flavonifractor plautii	6.85	78.41	Flavonifractor	6.85	78.41	-	-
M258	1108	Unclassified	NA	Flavonifractor plautii	7.94	78.67	Flavonifractor	7.94	78.67	-	-
M259	4606	Sutterella	Genus	Sutterella megalosphaeroides	21.34	81.59	Sutterella	21.34	81.59	Sutterella wadsworthensis	78.52
M260	1006	Roseburia	Genus	Eubacterium eligens	5.47	78.35	Eubacterium	6.96	78.29	Roseburia intestinalis	83.77
M261	1185	Roseburia	Genus	Eubacterium eligens	4.3	77.49	Eubacterium	6.84	78.05	Roseburia inulinivorans	77.55
M262	2167	Unclassified	NA	Clostridium botulinum	2.63	75.67	Clostridium	8.03	75.11	-	-
M263	1753	Unclassified	NA	Clostridium botulinum	2.85	74.63	Clostridium	9.41	74.87	-	-
M264	904	Unclassified	NA	Clostridium botulinum	2.54	76.55	Clostridium	8.63	76.02	-	-
M265	1263	Unclassified	NA	Clostridium botulinum	3.88	75.46	Clostridium	11.01	75.41	-	-
M266	1311	Faecalibacterium prausnitzii	Species	Faecalibacterium prausnitzii	74.52	83.7	Faecalibacterium	74.52	83.7	Faecalibacterium prausnitzii	91.36
M267	865	Faecalibacterium prausnitzii	Species	Faecalibacterium prausnitzii	79.31	84.01	Faecalibacterium	79.31	84.01	Faecalibacterium prausnitzii	90.8
M268	7574	Unclassified	NA	Clostridium kluyveri	0.74	80.43	Desulfitobacterium	1.16	74.41	-	-
M269	1703	Lachnoclostridium phocaeense	Species	Lachnoclostridium phocaeense	96.54	98.66	Lachnoclostridium	96.54	98.66	Clostridium scindens	79.49
M270	3238	Clostridium	Genus	Lachnoclostridium phocaeense	18.31	81.64	Lachnoclostridium	18.53	81.58	Clostridium scindens	80.66
M271	1006	Unclassified	NA	Clostridium botulinum	3.48	75.6	Clostridium	13.22	75.1	-	-
M272	2833	Unclassified	NA	Clostridium propionicum	4.2	76.07	Clostridium	5.15	76.01	-	-
M273	1517	Unclassified	NA	Flavonifractor plautii	5.08	75.55	Flavonifractor	5.08	75.55	Bifidobacterium bifidum	57.46
M274	2274	Unclassified	NA	Flavonifractor plautii	7.96	76.53	Flavonifractor	7.96	76.53	-	-
M275	6824	Coprococcus	Genus	Blautia obeum	9.98	79.16	Blautia	14.05	78.78	Coprococcus comes	78.02
M276	1791	Coprococcus	Genus	Blautia obeum	10.72	78.63	Blautia	14.91	78.5	Coprococcus comes	77.99
M277	5706	Blautia	Genus	Blautia obeum	56.85	82.24	Blautia	57.13	82.2	[Ruminococcus] obeum	88.11
M278	2863	Ruminococcus obeum	Species	Blautia obeum	76.35	83.27	Blautia	76.42	83.26	[Ruminococcus] obeum	98.47
M279	6640	Coprococcus comes	Species	Ruminococcus torques	23.63	78.8	Ruminococcus	23.69	78.79	Coprococcus comes	97.91
M280	7473	Ruminococcus lactaris	Species	Ruminococcus torques	42.25	81.12	Ruminococcus	42.26	81.12	Ruminococcus lactaris	98.54
M281	5282	Roseburia	Genus	Roseburia intestinalis	6.06	78.59	Roseburia	8.75	78.6	Roseburia inulinivorans	74.72
M282	7007	Ruminococcus torques	Species	Ruminococcus torques	90.02	96.12	Ruminococcus	90.05	96.12	[Ruminococcus] torques	94.83
M283	2093	Ruminococcus torques	Species	Ruminococcus torques	82.08	95.67	Ruminococcus	82.08	95.67	[Ruminococcus] torques	95.43
M284	806	Unclassified	NA	Ruminococcus sp. SR1/5	7.94	79.74	Blautia	9.55	77.22	unnamed Ruminococcus sp. SR1/5	74.38
M285	877	Unclassified	NA	Ruminococcus sp. SR1/5	6.61	75.64	Blautia	11.17	76.41	-	-
M286	5243	Blautia	Genus	Blautia sp. YL58	24.85	78.09	Blautia	31.93	78.39	Blautia hansenii	79.45
M287	1644	Blautia	Genus	Blautia sp. YL58	35.71	77.49	Blautia	40.63	77.63	Blautia hansenii	84.08
M288	3104	Ruminococcus	Genus	Ruminococcus sp. SR1/5	26.39	78.66	Ruminococcus/Blautia	41.4	78.64	unnamed Ruminococcus sp. 5_1_39BFAA	82.76
M289	4390	Ruminococcus sp. 5_1_39BFAA	Species	Ruminococcus sp. SR1/5	23.9	79.17	Ruminococcus/Blautia	48.91	79.32	unnamed Ruminococcus sp. 5_1_39BFAA	91.9
M290	864	Ruminococcus sp. 5_1_39BFAA	Species	Ruminococcus sp. SR1/5	28.94	80.43	Ruminococcus/Blautia	54.75	80.43	unnamed Ruminococcus sp. 5_1_39BFAA	92.21
M291	8904	Ruminococcus sp. 5_1_39BFAA	Species	Ruminococcus sp. SR1/5	34.16	79.72	Ruminococcus/Blautia	62.47	79.74	unnamed Ruminococcus sp. 5_1_39BFAA	95.76
M292	17795	Unclassified	NA	Ruminococcus sp. SR1/5	7.27	79.34	Blautia	11.6	78.65	Roseburia hominis	74.35
M293	12000	Lachnoclostridium	Genus	Lachnoclostridium sp. YL32	26.14	78.02	Lachnoclostridium	26.27	78.01	Clostridium bolteae	79.4
M294	1428	Lachnoclostridium	Genus	Lachnoclostridium sp. YL32	37.11	76.45	Lachnoclostridium	37.18	76.45	unnamed butyrate-producing bacterium SS3/4	72.85
M295	1960	butyrate-producing bacterium SS3/4	Species	butyrate-producing bacterium SS3/4	92.91	97.37	butyrate-producing bacterium	92.96	97.35	unnamed butyrate-producing bacterium SS3/4	97.76
M296	2059	butyrate-producing bacterium SS3/4	Species	butyrate-producing bacterium SS3/4	82.32	85.85	butyrate-producing bacterium	82.47	85.83	unnamed butyrate-producing bacterium SS3/4	91.02
M297	2018	Unclassified	NA	Lachnoclostridium sp. YL32	14.47	76.7	Lachnoclostridium	14.57	76.67	-	-
M298	4008	Unclassified	NA	butyrate-producing bacterium SS3/4	12.57	78.61	butyrate-producing	14.1	78.46	unnamed butyrate-producing bacterium SS3/4	77.73
M299	715	Unclassified	NA	Lachnoclostridium sp. YL32	11.89	76.36	butyrate-producing	13.57	77.71	-	-
M300	856	Clostridium	Genus	Clostridium saccharolyticum	13.67	75.4	Clostridium	28.62	78.12	-	-
M301	10054	Lachnoclostridium	Genus	Lachnoclostridium sp. YL32	32.68	79.46	Lachnoclostridium	32.79	79.44	Clostridium bolteae	82.81
M302	1947	Clostridium bolteae	Species	Clostridium bolteae	95.38	97.86	Clostridium	95.58	97.82	Clostridium bolteae	71.25
M303	1339	Clostridium bolteae	Species	Clostridium bolteae	91.34	97.29	Clostridium	91.41	97.28	Clostridium bolteae	92.35
M304	1711	Clostridium bolteae	Species	Clostridium bolteae	93.22	98.62	Clostridium	93.45	98.61	Clostridium bolteae	99.02
M305	772	Clostridium bolteae	Species	Clostridium bolteae	62.82	95.45	Clostridium	63.08	95.38	Clostridium bolteae	93.8
M306	5061	Lachnoclostridium sp. YL32	Species	Lachnoclostridium sp. YL32	86.33	97.66	Lachnoclostridium	86.33	97.66	Clostridium bolteae	86.26
M307	2881	Clostridium symbiosum	Species	Clostridium saccharolyticum	21.35	76.86	Clostridium	22.11	77.22	Clostridium symbiosum	99.3
M308	4603	Clostridium	Genus	Clostridium saccharolyticum	13.08	77.28	Clostridium	13.99	78.4	Clostridium saccharolyticum	78.91
M309	2656	Clostridiales bacterium 1_7_47FAA	Species	Lachnoclostridium sp. YL32	51.13	80.41	Lachnoclostridium	51.17	80.4	unnamed Clostridiales bacterium 1_7_47FAA	93.86
M310	10385	Clostridium ramosum	Species	Clostridium sporogenes	6.27	80.36	Clostridium	9.01	77.29	Clostridium ramosum	97.51
M311	1510	Clostridium spiroforme	Species	Erysipelotrichaceae bacterium GAM147	11.13	80.02	Erysipelotrichaceae	11.46	79.9	Clostridium spiroforme	98.65
M312	1013	Clostridium spiroforme	Species	Clostridium sporogenes	10.07	81.04	Clostridium	12.14	80.11	Clostridium spiroforme	97.13
M313	11361	Eubacterium rectale	Species	Eubacterium rectale	92.87	97.13	Eubacterium	93	97.12	Eubacterium rectale	97.27
M314	6663	Eubacterium	Genus	Eubacterium eligens	46.57	80.29	Eubacterium	48.66	80.36	Eubacterium eligens	81.65
M315	4035	Eubacterium	Genus	Eubacterium eligens	37.2	79.27	Eubacterium	40.02	79.29	Eubacterium eligens	82
M316	2513	Eubacterium	Genus	Eubacterium eligens	32.31	79.73	Eubacterium	34.14	79.79	Eubacterium eligens	82.51
M317	6925	Eubacterium	Genus	Eubacterium eligens	38.17	79.54	Eubacterium	40.62	79.84	Eubacterium eligens	80.27
M318	10703	Eubacterium eligens	Species	Eubacterium eligens	85.37	93.83	Eubacterium	86.02	93.78	Eubacterium eligens	95.28
M319	10430	Eubacterium	Genus	Eubacterium eligens	21.3	78.55	Eubacterium	23.6	79.19	Eubacterium eligens	78.69
M320	10695	Ruminococcus torques	Species	Ruminococcus torques	27.41	78.78	Ruminococcus	27.42	78.78	[Ruminococcus] torques	97.09
M321	17884	Ruminococcus gnavus	Species	Ruminococcus torques	26.78	79.47	Ruminococcus	27.23	79.75	[Ruminococcus] gnavus	96.51
M322	1205	Ruminococcus	Genus	Ruminococcus torques	20.91	78.91	Ruminococcus	21.24	79.21	[Ruminococcus] gnavus	86.3
M323	6864	Blautia	Genus	Blautia obeum	33.62	79.36	Blautia	36.63	79.22	[Ruminococcus] obeum	83.32
M324	7230	Ruminococcus	Genus	Ruminococcus torques	16.54	77.79	Ruminococcus	16.56	77.81	unnamed Lachnospiraceae bacterium 2_1_46FAA	82.96
M325	804	Ruminococcus	Genus	Ruminococcus torques	12.31	75.92	Ruminococcus	12.31	75.92	unnamed Lachnospiraceae bacterium 2_1_46FAA	83.64
M326	11799	Roseburia intestinalis	Species	Roseburia intestinalis	94.33	97.48	Roseburia	94.71	97.45	Roseburia intestinalis	96.51
M327	13144	Roseburia inulinivorans	Species	Roseburia intestinalis	36.06	80.48	Roseburia	46.62	80.56	Roseburia inulinivorans	95.43
M328	11920	Roseburia	Genus	Roseburia intestinalis	19.08	79.4	Roseburia	27.59	79.58	Roseburia intestinalis	78.4
M329	5587	Roseburia hominis	Species	Roseburia hominis	95.1	97.62	Roseburia	95.54	97.56	Roseburia hominis	96.75
M330	11102	Unclassified	NA	Lachnospiraceae bacterium GAM79	5.1	80.73	Roseburia	7.93	77.69	unnamed Lachnospiraceae bacterium 3_1_57FAA_CT1	76.74
M331	1844	Lachnospiraceae bacterium GAM79	Species	Lachnospiraceae bacterium GAM79	90.78	95.86	Lachnospiraceae	90.84	95.86	Coprococcus catus	67.32
M332	2280	Lachnospiraceae bacterium GAM79	Species	Lachnospiraceae bacterium GAM79	82.37	90.71	Lachnospiraceae	82.5	90.71	unnamed Lachnospiraceae bacterium 3_1_57FAA_CT1	69.02
M333	9655	Lachnospiraceae bacterium GAM79	Species	Lachnospiraceae bacterium GAM79	93.63	97.56	Lachnospiraceae	93.67	97.55	unnamed Lachnospiraceae bacterium 3_1_57FAA_CT1	74.05
M334	4849	Lachnospiraceae	Genus	Lachnospiraceae bacterium GAM79	69	88.2	Lachnospiraceae	69.07	88.19	-	-
M335	739	Lachnospiraceae bacterium GAM79	Species	Lachnospiraceae bacterium GAM79	83.63	98.31	Lachnospiraceae	83.63	98.31	unnamed Lachnospiraceae bacterium 3_1_57FAA_CT1	65.59
M336	5588	Dorea longicatena	Species	Ruminococcus torques	26.34	79.24	Ruminococcus	26.34	79.24	Dorea longicatena	90.01
M337	2036	Dorea longicatena	Species	Ruminococcus torques	23.77	80.39	Ruminococcus	23.77	80.39	Dorea longicatena	90.98
M338	4823	Dorea longicatena	Species	Ruminococcus torques	23.89	78.9	Ruminococcus	23.91	78.92	Dorea longicatena	92.63
M339	3781	Dorea formicigenerans	Species	Ruminococcus torques	25.02	78.06	Ruminococcus	25.07	78.07	Dorea formicigenerans	97.38
M340	10541	Clostridium sporogenes	Species	Clostridium sporogenes	71.25	97.68	Clostridium	71.43	97.63	Clostridium spiroforme	82.35
M341	1040	Clostridium	Genus	Clostridium sporogenes	59.62	96.24	Clostridium	59.71	96.21	Clostridium spiroforme	81.55
M342	1286	Erysipelotrichaceae	Genus	Erysipelotrichaceae bacterium GAM147	36.63	88.4	Erysipelotrichaceae	36.7	88.37	-	-
M343	5060	Eubacterium	Genus	Eubacterium eligens	5.3	76.35	Eubacterium	6.98	76.58	Eubacterium ventriosum	83.1
M344	5425	Roseburia	Genus	Roseburia intestinalis	20.17	78.38	Roseburia	24.79	78.23	Roseburia inulinivorans	78.52
M345	5776	Eubacterium ventriosum	Species	Eubacterium eligens	8.55	77.13	Eubacterium	11.44	77.73	Eubacterium ventriosum	98.12
M346	5326	Eubacterium	Genus	Eubacterium eligens	5.61	76.51	Eubacterium	7.38	77.06	Eubacterium ventriosum	79.45
M347	5156	Unclassified	NA	Eubacterium rectale	6.13	78.39	Eubacterium	11.54	78.11	Clostridium bolteae	67.85
M348	3453	Unclassified	NA	Eubacterium eligens	5.18	76.15	Eubacterium	9.59	76.86	Dorea longicatena	68.58
M349	5126	Clostridium	Genus	Clostridium saccharolyticum	19.33	77.6	Clostridium	39.88	79.11	Clostridium symbiosum	79.19
M350	2081	Ruminococcus	Genus	Ruminococcus sp. SR1/5	30.85	78.32	Ruminococcus	31.04	78.33	unnamed Ruminococcus sp. 5_1_39BFAA	89.39
M351	8776	Anaerostipes hadrus	Species	Anaerostipes hadrus	94.45	97.61	Anaerostipes	94.45	97.61	butyrate-producing bacterium	96.65
M352	3857	Eubacterium hallii	Species	Eubacterium hallii	87.04	97.11	Eubacterium	87.14	97.1	Eubacterium hallii	88.12
M353	4124	Eubacterium hallii	Species	Eubacterium hallii	63.34	86.74	Eubacterium	63.36	86.74	Eubacterium hallii	97.71
M354	4959	Roseburia	Genus	Roseburia intestinalis	3.21	76.47	Roseburia	4.09	77.05	unnamed butyrate-producing bacterium SS3/4	71.11
M355	4673	Roseburia	Genus	Roseburia intestinalis	13.48	77.83	Roseburia	25.94	77.73	Roseburia intestinalis	73.75
M356	2570	Roseburia	Genus	Roseburia intestinalis	14.44	77.07	Roseburia	24.16	76.95	unnamed Lachnospiraceae bacterium 1_4_56FAA	74.26
M357	2871	Unclassified	NA	Flavonifractor plautii	8.67	76.82	Flavonifractor	8.67	76.82	-	-
M358	2178	Unclassified	NA	Flavonifractor plautii	7.35	76.37	Flavonifractor	7.35	76.37	Eggerthella lenta	60.74
M359	3375	Oscillibacter	Genus	Oscillibacter valericigenes	13.07	76.97	Oscillibacter	14.87	79.53	Oscillibacter valericigenes	76.27
M360	1731	Slackia	Genus	Slackia heliotrinireducens	15.08	78.81	Slackia	15.08	78.81	Slackia heliotrinireducens	78.77
M361	1134	Clostridium	Genus	Clostridium botulinum	14.9	78.2	Clostridium	59.7	78.72	unnamed Clostridium sp. 7_2_43FAA	82.56
M362	2257	Clostridium	Genus	Clostridium botulinum	15.11	77.47	Clostridium	53.74	77.85	unnamed Clostridium sp. 7_2_43FAA	82
M363	1026	Clostridium	Genus	Clostridium botulinum	13.16	78.99	Clostridium	44.64	78.96	-	-
M364	4627	Clostridium	Genus	Clostridium botulinum	13.01	77.85	Clostridium	49.08	78.13	unnamed Clostridium sp. 7_2_43FAA	82.12
M365	4333	Clostridium	Genus	Clostridium botulinum	15.97	78.75	Clostridium	55.94	78.93	unnamed Clostridium sp. 7_2_43FAA	80.41
M366	1842	Clostridium	Genus	Clostridium botulinum	15.04	77.05	Clostridium	54.72	77.24	unnamed Clostridium sp. 7_2_43FAA	79.47
M367	713	Clostridioides	Genus	Clostridioides difficile	30.43	79.73	Clostridioides	30.43	79.73	[Clostridium] difficile	82.19
M368	5065	Clostridium	Genus	Clostridium botulinum	11.71	78.1	Clostridium	41.34	77.88	unnamed Clostridium sp. 7_2_43FAA	77.96
M369	2180	Turicibacter sanguinis	Species	Turicibacter sp. H121	48.94	79.92	Turicibacter	48.94	79.92	Turicibacter sanguinis	99.83
M370	3599	Cellulosilyticum	Genus	Cellulosilyticum lentocellum	20.76	77.78	Cellulosilyticum	20.92	77.82	Cellulosilyticum lentocellum	76.93
M371	1920	Unclassified	NA	Acholeplasma palmae	0.52	76.22	Clostridium	1.72	75.12	-	-
M372	5505	Unclassified	NA	Faecalibacterium prausnitzii	1.96	80.52	Ruminococcus	3.14	78.56	Oscillibacter valericigenes	63.01
M373	2014	Megasphaera elsdenii	Species	Megasphaera elsdenii	88.78	90.16	Megasphaera	89.62	90.82	Megasphaera elsdenii	94.73
M374	3810	Olsenella	Genus	Olsenella umbonata	43.49	95.67	Olsenella	44.09	95.45	Olsenella uli	73.94
M375	2430	Weissella cibaria	Species	Weissella cibaria	98.31	98.99	Weissella	98.52	98.98	Weissella cibaria	98.85
M376	886	Weissella	Genus	Weissella cibaria	58.8	81.24	Weissella	61.96	81.2	Weissella cibaria	79.73
M377	2498	Methanobrevibacter smithii	Species	Methanobrevibacter smithii	92.35	98.59	Methanobrevibacter	92.99	98.47	Methanobrevibacter smithii	99.03
M378	2017	Unclassified	NA	Alistipes finegoldii	1.34	75.07	Alistipes	2.03	74.8	-	-
M379	4375	Unclassified	NA	Ruminococcus bromii	2.31	76.56	Ruminococcus	3.66	76.64	-	-
M380	897	Unclassified	NA	Ruminococcus bromii	2.45	76.98	Ruminococcus	3.9	76.97	-	-
M381	2449	Parasutterella excrementihominis	Species	Burkholderiales bacterium YL45	27.32	76.99	Burkholderiales	27.32	76.99	Parasutterella excrementihominis	95.81
M382	1276	Burkholderiales	Genus	Burkholderiales bacterium YL45	27.98	78.55	Burkholderiales	27.98	78.55	Parasutterella excrementihominis	84.07
M383	3510	Burkholderiales	Genus	Burkholderiales bacterium YL45	23.05	76.85	Burkholderiales	23.08	76.84	Parasutterella excrementihominis	86.84
M384	6165	Roseburia	Genus	Roseburia intestinalis	5.37	77.22	Roseburia	6.28	77.52	Roseburia inulinivorans	73.82
M385	2304	Dialister invisus	Species	Dialister sp. Marseille-P5638	7.38	79.57	Dialister	8.29	79.12	Dialister invisus	98.89
M386	6018	Akkermansia muciniphila	Species	Akkermansia muciniphila	93.6	98.95	Akkermansia	93.65	98.94	Akkermansia muciniphila	98.25
M387	3739	Akkermansia muciniphila	Species	Akkermansia muciniphila	72.64	88.31	Akkermansia	72.64	88.31	Akkermansia muciniphila	91.21
M388	1826	Eggerthella lenta	Species	Eggerthella lenta	94.85	98.58	Eggerthella	94.96	98.56	Eggerthella lenta	94.63
M389	7073	Flavonifractor plautii	Species	Flavonifractor plautii	95.07	97.1	Flavonifractor	95.07	97.1	Pseudoflavonifractor capillosus	85.01
M390	4159	Clostridiales bacterium CCNA10	Species	Clostridiales bacterium CCNA10	93.94	98.06	Clostridiales	93.94	98.06	unnamed Ruminococcaceae bacterium D16	84.71
M391	6915	Oscillibacter sp. PEA192	Species	Oscillibacter sp. PEA192	93.64	98.05	Oscillibacter	93.72	98.03	Oscillibacter valericigenes	80.26
M392	1997	Unclassified	NA	Sutterella megalosphaeroides	5.66	78.9	Sutterella	5.66	78.9	-	-
M393	1227	Sutterella	Genus	Sutterella megalosphaeroides	9.62	79.66	Sutterella	9.62	79.66	Sutterella wadsworthensis	75.39
M394	2509	Unclassified	NA	Sutterella megalosphaeroides	7.37	78.8	Sutterella	7.37	78.8	-	-
M395	2966	Collinsella intestinalis	Species	Collinsella aerofaciens	19.99	82.23	Collinsella	19.99	82.23	Collinsella intestinalis	97.7
M396	1889	Unclassified	NA	Clostridium botulinum	2.81	75.41	Clostridium	6.83	74.96	-	-
M397	2382	Lactobacillus mucosae	Species	Lactobacillus mucosae	93.2	96.59	Lactobacillus	94.42	96.44	Lactobacillus oris	79.91
M398	2737	Lactobacillus amylovorus	Species	Lactobacillus amylovorus	57.95	99.39	Lactobacillus	67.12	98.71	Lactobacillus amylovorus	94.74
M399	6408	Clostridium sp. L2-50	Species	Coprococcus sp. ART55/1	26.09	79.19	Coprococcus	27.67	79.27	unnamed Clostridium sp. L2-50	95.94
M400	1410	Clostridium	Genus	Coprococcus sp. ART55/1	15.32	77.21	Coprococcus	16.03	77.29	unnamed Clostridium sp. L2-50	82.57
M401	5813	Coprococcus sp. ART55/1	Species	Coprococcus sp. ART55/1	87.72	97.4	Coprococcus	87.85	97.37	Coprococcus eutactus	92.62
M402	792	Unclassified	NA	Ruminococcus bromii	7.45	76.54	Ruminococcus	9.09	76.75	-	-
M403	3542	Unclassified	NA	Ruminococcus bromii	11.66	77.48	Ruminococcus	13.55	77.46	-	-
M404	2446	Unclassified	NA	Ruminococcus bromii	6.3	75.52	Ruminococcus	7.77	75.65	-	-
M405	2475	Eubacterium	Genus	Eubacterium eligens	6.14	75.86	Eubacterium	8.93	76.03	Eubacterium ventriosum	84.89
M406	9827	Bifidobacterium pseudocatenulatum	Species	Bifidobacterium pseudocatenulatum	81.34	98.49	Bifidobacterium	96.5	97.02	Bifidobacterium catenulatum-Bifidobacterium pseudocatenulatum complex	93.5
M407	1271	Bifidobacterium longum	Species	Bifidobacterium longum	89.38	98.63	Bifidobacterium	97.01	98.23	Bifidobacterium longum	89.71
M408	5055	Bifidobacterium adolescentis	Species	Bifidobacterium adolescentis	93.57	98.87	Bifidobacterium	96.76	98.14	Bifidobacterium adolescentis	94.07
M409	11208	Bifidobacterium longum	Species	Bifidobacterium longum	93.18	99.04	Bifidobacterium	96.29	98.88	Bifidobacterium longum	94.79
M410	761	Bifidobacterium longum	Species	Bifidobacterium longum	96.19	99.31	Bifidobacterium	97.9	99.29	Bifidobacterium longum	93.06
M411	893	Streptococcus salivarius	Species	Streptococcus salivarius	94.51	98.18	Streptococcus	98.99	97.99	Streptococcus salivarius	96.14
M412	2663	Streptococcus thermophilus	Species	Streptococcus thermophilus	95.46	98.95	Streptococcus	98.72	98.79	Streptococcus thermophilus	96.15
M413	2220	Flavonifractor	Genus	Flavonifractor plautii	17.88	78.44	Flavonifractor/Intestinimonas	24.14	78.44	Pseudoflavonifractor capillosus	72.9
M414	6703	Phascolarctobacterium faecium	Species	Phascolarctobacterium faecium	48.19	98.71	Phascolarctobacterium	92.7	98.68	Phascolarctobacterium succinatutens	75.74
M415	3356	Ruminococcus	Genus	Ruminococcus sp. SR1/5	26.37	79.51	Ruminococcus/Blautia	44.25	79.48	unnamed Ruminococcus sp. 5_1_39BFAA	83.75
M416	4619	Unclassified	NA	Ruminococcus bromii	3.01	76.18	Ruminococcus	5.11	76.37	-	-
M417	3447	Blautia	Genus	Blautia obeum	11.72	78.48	Blautia	21.38	78.05	Lactobacillus rhamnosus	99.99
M418	1156	Ruminococcus	Genus	Blautia obeum	11.16	80.52	Ruminococcus/Blautia	20.5	79.84	unnamed Ruminococcus sp. SR1/5	76.05
M419	2021	Ruminococcus	Genus	Blautia obeum	10.94	77.85	Ruminococcus/Blautia	29.69	77.57	-	-
M420	2073	Clostridium	Genus	Clostridium saccharolyticum	14.28	76.92	Clostridium	14.28	76.92	Clostridium saccharolyticum	77.49
M421	944	Paraprevotella xylaniphila	Species	Paraprevotella xylaniphila	62.71	99.21	Paraprevotella	62.71	99.21	-	-
M422	4157	Unclassified	NA	Roseburia intestinalis	5.34	77.06	Roseburia	6.52	77.06	-	-
M423	2105	Eubacterium	Genus	Eubacterium rectale	49.88	80.05	Eubacterium	50.59	79.98	Eubacterium rectale	87.06
M424	1832	Clostridium leptum	Species	Ruminiclostridium sp. KB18	5.84	75.54	Ruminiclostridium	5.9	75.52	Clostridium leptum	99.42
M425	3672	Unclassified	NA	Sutterella megalosphaeroides	4.14	78.56	Burkholderia	4.71	76.82	Sutterella wadsworthensis	72.6
M426	2290	Clostridium	Genus	Clostridium propionicum	28.6	76.93	Clostridium	28.78	76.93	-	-
M427	5009	Ruminococcus	Genus	Ruminococcus torques	13.89	77.56	Ruminococcus	14.07	77.56	unclassified Lachnospiraceae	98.2
M428	1059	Ruminococcus	Genus	Ruminococcus sp. SR1/5	8.78	77.95	Ruminococcus	9.25	78.23	Coprococcus comes	70.73
M429	5585	Sutterella wadsworthensis	Species	Sutterella megalosphaeroides	9.19	80.03	Sutterella	9.19	80.03	Sutterella wadsworthensis	97.06
M430	1477	Bacteroides dorei	Species	Bacteroides dorei	84.7	95.22	Bacteroides	88.42	94.91	-	-
M431	6111	Unclassified	NA	Eubacterium eligens	6.66	77.39	Eubacterium	11.62	77.56	Butyrivibrio crossotus	73.87
M432	4960	Collinsella aerofaciens	Species	Collinsella aerofaciens	90.54	95.09	Collinsella	90.54	95.09	Collinsella aerofaciens	92.83
M433	976	Collinsella aerofaciens	Species	Collinsella aerofaciens	86.99	95.27	Collinsella	86.99	95.27	Collinsella aerofaciens	97.53
M434	3030	Alistipes	Genus	Alistipes shahii	46.77	83.73	Alistipes	63.86	83.39	Alistipes shahii	88.43
M435	1501	Unclassified	NA	Clostridium botulinum	3.6	75.07	Clostridium	10.79	74.8	-	-
M436	6970	Unclassified	NA	Roseburia intestinalis	4.46	76.96	Roseburia	5.25	77.19	Clostridium phytofermentans	68.94
M437	1892	Streptococcus pasteurianus	Species	Streptococcus pasteurianus	82.56	99.44	Streptococcus	97.94	99.07	Streptococcus gallolyticus	98.38
M438	2227	Streptococcus infantarius	Species	Streptococcus infantarius	61.47	98.92	Streptococcus	98.61	98.5	Streptococcus infantarius	96.28
M439	742	Ruminococcus sp. SR1/5	Species	Ruminococcus sp. SR1/5	76.01	88.5	Ruminococcus	76.01	88.5	unnamed Ruminococcus sp. SR1/5	89.86
M440	1777	Ruminococcus sp. SR1/5	Species	Ruminococcus sp. SR1/5	66.24	86.65	Ruminococcus	66.35	86.64	unnamed Ruminococcus sp. SR1/5	79.51
M441	726	Ruminococcus sp. SR1/5	Species	Ruminococcus sp. SR1/5	77	85.76	Ruminococcus	77	85.76	unnamed Ruminococcus sp. SR1/5	90.8
M442	1865	Ruminococcus sp. SR1/5	Species	Ruminococcus sp. SR1/5	71.15	87.42	Ruminococcus	71.21	87.41	unnamed Ruminococcus sp. SR1/5	93.07
M443	966	Ruminococcus	Genus	Ruminococcus sp. SR1/5	75.26	84.59	Ruminococcus	75.26	84.59	unnamed Ruminococcus sp. SR1/5	86.18
M444	2283	Ruminococcus sp. SR1/5	Species	Ruminococcus sp. SR1/5	94.83	97.67	Ruminococcus	94.83	97.67	unnamed Ruminococcus sp. SR1/5	94.38
M445	2071	Unclassified	NA	Lachnoclostridium sp. YL32	4.73	80.17	Lachnoclostridium	4.97	79.86	unnamed Lachnospiraceae bacterium 3_1_57FAA_CT1	82.55
M446	4564	Blautia	Genus	Blautia sp. YL58	5.24	76.5	Blautia	6.09	76.61	unnamed Lachnospiraceae bacterium 3_1_57FAA_CT1	88.29
M447	6186	Megamonas hypermegale	Species	Megamonas hypermegale	87.6	97.29	Megamonas	87.6	97.29	Eubacterium biforme	61.65
M448	3933	Unclassified	NA	Bacteroides fragilis	3.53	76.4	Bacteroides	16.55	75.89	Parabacteroides distasonis	73.84
M449	4332	Flavonifractor	Genus	Flavonifractor plautii	18.05	78.61	Flavonifractor/Intestinimonas	26.36	78.61	Pseudoflavonifractor capillosus	75.42
M450	1477	Unclassified	NA	Faecalibacterium prausnitzii	7.45	78.74	Faecalibacterium	7.45	78.74	-	-
M451	783	Unclassified	NA	Flavonifractor plautii	8.94	76.09	Flavonifractor	8.94	76.09	-	-
M452	2467	Fusobacterium mortiferum	Species	Fusobacterium mortiferum	87.23	98.48	Fusobacterium	89.3	98.07	Fusobacterium mortiferum	99.72
M453	3234	Clostridium bartlettii	Species	Clostridioides difficile	32.81	77.85	Clostridioides	32.81	77.85	[Clostridium] bartlettii	98.46
M454	2543	Clostridioides	Genus	Clostridioides difficile	27.68	77.06	Clostridioides	27.68	77.06	[Clostridium] bartlettii	77.49
M455	3484	Parabacteroides merdae	Species	Parabacteroides distasonis	30.05	77.52	Parabacteroides	30.08	77.51	Parabacteroides merdae	92.13
M456	724	Unclassified	NA	Parabacteroides distasonis	10.64	76.93	Parabacteroides	10.77	76.85	-	-
M457	6865	Ruthenibacterium lactatiformans	Species	Ruthenibacterium lactatiformans	95	98.63	Ruthenibacterium	95	98.63	-	-
M458	1902	Ruminococcus	Genus	Ruminococcus albus	5.99	77.4	Ruminococcus	19.72	77.45	Ruminococcus flavefaciens	81.88
M459	1350	Enterococcus faecium	Species	Enterococcus faecium	98.59	99.73	Enterococcus	98.81	99.73	Enterococcus faecium	93.59
M460	6525	Bilophila wadsworthia	Species	Desulfovibrio vulgaris	19.26	77.5	Desulfovibrio	29.93	77.48	Bilophila wadsworthia	96.87
M461	862	Unclassified	NA	Ruminococcus bromii	1.62	74.2	Clostridium	3.48	74.84	-	-
M462	1304	Unclassified	NA	Ruminococcus bromii	3.14	75.77	Ruminococcus	3.37	75.69	-	-
M463	1246	Coprococcus catus	Species	Coprococcus catus	95.67	98.26	Coprococcus	95.67	98.26	Coprococcus catus	98.73
M464	3066	Bacteroides	Genus	Bacteroides fragilis	26.61	79.45	Bacteroides	55.94	78.75	Bacteroides thetaiotaomicron	84.08
M465	2566	Unclassified	NA	Ruminococcus champanellensis	2.26	75.45	Ruminococcus	3.27	75.73	-	-
M466	4282	Fusobacterium nucleatum	Species	Fusobacterium varium	56.07	98.21	Fusobacterium	95.35	97.67	Fusobacterium varium	97.07
M467	2047	Unclassified	NA	Clostridium botulinum	1.71	76.62	Clostridium	10.65	76.72	-	-
M468	1458	Unclassified	NA	Eubacterium eligens	5.56	78.33	Clostridium	9.88	77.18	-	-
M469	3066	Unclassified	NA	Eubacterium eligens	2.54	77.43	Clostridium	6.43	75.89	-	-
M470	2624	Unclassified	NA	Roseburia intestinalis	6.29	76.46	Roseburia	7.01	76.4	unclassified Lachnospiraceae	70.27
M471	2758	Alistipes	Genus	Alistipes finegoldii	10.88	76.48	Alistipes	21.54	76.41	-	-
M472	1066	Blautia hansenii	Species	Blautia sp. YL58	21.01	78.2	Blautia	27.95	82.01	Blautia hansenii	90.77
M473	5829	Blautia	Genus	Blautia sp. N6H1-15	44.86	84.68	Blautia	51.91	84.36	Blautia hansenii	86.84
M474	4623	Blautia hansenii	Species	Blautia hansenii	92.52	97.25	Blautia	92.91	97.21	Blautia hansenii	97.9
M475	729	Blautia hansenii	Species	Blautia hansenii	84.5	88.94	Blautia	85.19	88.86	Blautia hansenii	92.26
M476	1984	Clostridium	Genus	Roseburia hominis	3.98	77.38	Blautia	6.35	77	Clostridium saccharolyticum	74.61
M477	2505	Unclassified	NA	Ruminiclostridium sp. KB18	11.86	75.35	Ruminiclostridium	11.86	75.35	-	-
M478	1261	Adlercreutzia equolifaciens	Species	Adlercreutzia equolifaciens	89.21	96.99	Adlercreutzia	89.21	96.99	Eggerthella lenta	82.06
M479	3554	Unclassified	NA	Ruminococcus bromii	5.46	76.21	Ruminococcus	8.05	76.77	-	-
M480	1998	Unclassified	NA	Ethanoligenens harbinense	4.55	75.36	Ethanoligenens	4.55	75.36	-	-
M481	3162	Roseburia	Genus	Roseburia intestinalis	14.1	77.49	Roseburia	21.38	77.28	Roseburia intestinalis	76.3
M482	1715	Lachnospiraceae bacterium 1_4_56FAA	Species	Ruminococcus torques	27.52	77.45	Ruminococcus	27.58	77.46	unnamed Lachnospiraceae bacterium 1_4_56FAA	96.72
M483	938	Dorea	Genus	Ruminococcus torques	15.03	77.04	Ruminococcus	15.03	77.04	Dorea longicatena	81.19
M484	1538	Unclassified	NA	Ruminococcus sp. SR1/5	9.82	77.13	Ruminococcus	9.95	77.08	unclassified Lachnospiraceae	68.29
M485	2571	Unclassified	NA	Ruminococcus bromii	4.2	75	Ruminococcus	5.45	76.03	-	-
M486	1733	Intestinimonas butyriciproducens	Species	Intestinimonas butyriciproducens	97.58	99.25	Intestinimonas	97.58	99.25	Pseudoflavonifractor capillosus	81.68
M487	817	Unclassified	NA	Eubacterium sulci	3.43	74.37	Eubacterium	4.04	74.8	-	-
M488	3612	Roseburia	Genus	Roseburia intestinalis	23.23	77.8	Roseburia	27.82	77.6	Roseburia intestinalis	78.09
M489	2783	Unclassified	NA	Clostridium botulinum	3.84	76.85	Clostridium	11.28	76.06	-	-
M490	2149	Unclassified	NA	Clostridium botulinum	3.86	75.73	Clostridium	12.05	75.27	-	-
M491	1027	Coprobacillus sp. 29_1	Species	Erysipelotrichaceae bacterium GAM147	4.77	79.71	Erysipelotrichaceae	5.06	79.68	unnamed Coprobacillus sp. 29_1	96.55
M492	2602	Unclassified	NA	Magnetospirillum gryphiswaldense	0.58	74	Magnetospirillum	1.23	74.97	-	-
M493	2614	Clostridium scindens	Species	Clostridium scindens	61.55	95.59	Clostridium	62.05	95.46	Clostridium scindens	94.84
M494	1062	Clostridium scindens	Species	Clostridium scindens	93.22	99.13	Clostridium	93.69	99.03	Clostridium scindens	94.08
M495	1538	Roseburia intestinalis	Species	Roseburia intestinalis	88.04	88.25	Roseburia	89.01	88.13	Roseburia intestinalis	84.92
M496	2948	Clostridioides	Genus	butyrate-producing bacterium SS3/4	29.17	78.67	butyrate-producing bacterium	30.94	78.68	unnamed butyrate-producing bacterium SS3/4	79.72
M497	1564	Clostridioides	Genus	butyrate-producing bacterium SS3/4	33.89	78.15	butyrate-producing bacterium	35.74	78.18	unnamed butyrate-producing bacterium SS3/4	82.03
M498	2380	Alistipes	Genus	Alistipes finegoldii	12.02	76.03	Alistipes	22.18	76.39	-	-
M499	1312	Bifidobacterium breve	Species	Bifidobacterium breve	96.95	99.28	Bifidobacterium	98.93	99.26	Bifidobacterium breve	91.06
M500	1730	Unclassified	NA	Faecalibacterium prausnitzii	6.99	77.87	Faecalibacterium	6.99	77.87	-	-
M501	2463	Romboutsia ilealis	Species	Romboutsia ilealis	74.5	92.98	Romboutsia	77.22	92.58	[Clostridium] difficile	83.67
M502	3682	Unclassified	NA	Candidatus Melainabacteria bacterium MEL.A1	4.81	78.71	Candidatus	4.81	78.71	-	-
M503	3975	Clostridium	Genus	Clostridium saccharolyticum	45.74	81.02	Clostridium	45.79	81.01	Clostridium saccharolyticum	87.7
M504	3687	Unclassified	NA	Clostridium botulinum	0.9	75.64	Clostridium	3.06	75.49	-	-
M505	2901	Dorea	Genus	Ruminococcus torques	14.13	77.12	Ruminococcus	14.17	77.12	Dorea longicatena	82.49
M506	1494	Holdemania filiformis	Species	Erysipelotrichaceae bacterium I46	4.48	74.16	Erysipelotrichaceae	4.48	74.16	Holdemania filiformis	98.3
M507	3371	Unclassified	NA	Micavibrio aeruginosavorus	0.65	77.28	Magnetospirillum	0.92	77.12	-	-
M508	1545	Unclassified	NA	Erysipelotrichaceae bacterium I46	19.81	76.38	Erysipelotrichaceae	19.81	76.38	unnamed Erysipelotrichaceae bacterium 5_2_54FAA	82.4
M509	2190	Coprococcus catus	Species	Coprococcus catus	71.87	86.89	Coprococcus	71.96	86.88	Coprococcus catus	91.97
M510	1273	Unclassified	NA	Clostridium botulinum	1.1	75.58	Clostridium	3.3	74.6	-	-
M511	3448	Roseburia	Genus	Roseburia intestinalis	24.01	79.31	Roseburia	37.59	78.84	Roseburia inulinivorans	82.69
M512	2681	Ruminococcus	Genus	Ruminococcus bromii	16.3	76.64	Ruminococcus	17.01	76.58	Ruminococcus bromii	75.26
M513	3606	Unclassified	NA	Ruminococcus champanellensis	1.05	75.32	Ruminococcus	2.75	75.27	-	-
M514	2128	Roseburia	Genus	Roseburia intestinalis	12.73	77.26	Roseburia	14.85	76.99	Roseburia inulinivorans	77.19
M515	3405	Alistipes	Genus	Alistipes finegoldii	11.07	76.75	Alistipes	20.97	77.11	-	-
M516	2293	Unclassified	NA	Ruthenibacterium lactatiformans	17.62	79.3	Ruthenibacterium	17.62	79.3	-	-
M517	1874	Anaerostipes hadrus	Species	Anaerostipes hadrus	71.29	86.32	Anaerostipes	71.29	86.32	butyrate-producing bacterium	91.91
M518	1575	Anaerostipes hadrus	Species	Anaerostipes hadrus	85.14	86.2	Anaerostipes	85.14	86.2	butyrate-producing bacterium	90.87
M519	5721	Unclassified	NA	Faecalibacterium prausnitzii	3.44	76.7	Faecalibacterium	3.44	76.7	-	-
M520	753	Alistipes shahii	Species	Alistipes shahii	63.88	92.1	Alistipes	67.86	91.48	-	-
M521	1497	Erysipelotrichaceae bacterium I46	Species	Erysipelotrichaceae bacterium I46	95.93	98.45	Erysipelotrichaceae	95.93	98.45	unnamed Clostridium sp. HGF2	99.37
M522	1432	Erysipelotrichaceae bacterium I46	Species	Erysipelotrichaceae bacterium I46	96.02	98.22	Erysipelotrichaceae	96.02	98.22	unnamed Clostridium sp. HGF2	99.08
M523	2776	Dialister sp. Marseille-P5638	Species	Dialister sp. Marseille-P5638	94.38	98.5	Dialister	94.38	98.5	Dialister invisus	76.99
M524	2527	Erysipelotrichaceae bacterium 5_2_54FAA	Species	Erysipelotrichaceae bacterium I46	28.73	76.68	Erysipelotrichaceae	28.73	76.68	unnamed Erysipelotrichaceae bacterium 5_2_54FAA	99.11
M525	1298	Holdemania	Genus	Erysipelotrichaceae bacterium I46	3.47	74.48	Erysipelotrichaceae	3.47	74.48	Holdemania filiformis	86.78
M526	1968	Unclassified	NA	Flavonifractor plautii	10.62	76.75	Flavonifractor	10.62	76.75	-	-
M527	2350	Bilophila wadsworthia	Species	Desulfovibrio vulgaris	11.96	76.48	Desulfovibrio	18.09	76.39	Bilophila wadsworthia	91.49
M528	3117	Alistipes	Genus	Alistipes shahii	12.96	77.03	Alistipes	25.79	76.94	-	-
M529	1847	Bifidobacterium dentium	Species	Bifidobacterium dentium	92.96	98.52	Bifidobacterium	96.1	98.05	Bifidobacterium dentium	99.4
M530	3001	Unclassified	NA	Erysipelotrichaceae bacterium I46	19.13	77	Erysipelotrichaceae	19.13	77	unnamed Erysipelotrichaceae bacterium 5_2_54FAA	81.54
M531	1364	Unclassified	NA	Faecalibacterium prausnitzii	4.77	77	Faecalibacterium	4.77	77	-	-
M532	1207	Eggerthella	Genus	Eggerthella sp. YY7918	3.56	76.1	Eggerthella	4.56	75.75	unnamed Eggerthella sp. YY7918	70.29
M533	1509	Unclassified	NA	Ruminococcus bicirculans	4.57	78.03	Ruminococcus	9.01	77.65	-	-
M534	1124	Anaerostipes caccae	Species	Anaerostipes hadrus	13.88	76.76	Anaerostipes	13.97	76.87	Anaerostipes caccae	92.4
M535	2530	Anaerostipes caccae	Species	Anaerostipes hadrus	24.27	76.13	Anaerostipes	24.66	76.49	Anaerostipes caccae	99.31
M536	1719	Flavonifractor	Genus	Clostridiales bacterium CCNA10	30.08	81.88	Clostridiales	30.08	81.88	unnamed Ruminococcaceae bacterium D16	84.78
M537	1812	Butyricimonas	Genus	Butyricimonas faecalis	34.93	83.42	Butyricimonas	34.93	83.42	-	-
M538	2100	Unclassified	NA	Faecalibacterium prausnitzii	1.71	76.66	Faecalibacterium	1.71	76.66	-	-
M539	2028	Ruminococcus	Genus	Ruminococcus torques	42.36	79.18	Ruminococcus	42.41	79.19	[Ruminococcus] gnavus	81.56
M540	1051	Dialister	Genus	Dialister pneumosintes	6.76	80.39	Dialister	12.56	79.11	Dialister invisus	73.68
M541	2684	Intestinimonas	Genus	Intestinimonas butyriciproducens	39.53	80.6	Intestinimonas	39.53	80.6	Pseudoflavonifractor capillosus	83.66
M542	2091	Unclassified	NA	Clostridium botulinum	1.43	77.97	Clostridium	5.26	77.69	-	-
M543	2970	Flavonifractor	Genus	Flavonifractor plautii	24.51	78.78	Flavonifractor	24.51	78.78	Pseudoflavonifractor capillosus	79.96
M544	4152	Coprococcus	Genus	Ruminococcus torques	6.72	77.78	Ruminococcus	6.79	77.81	Coprococcus comes	79.27
M545	2785	Desulfovibrio	Genus	Desulfovibrio vulgaris	15.48	76.95	Desulfovibrio	25.42	77.01	Desulfovibrio vulgaris	75.18
M546	2160	Unclassified	NA	Clostridium botulinum	3.43	75.68	Clostridium	9.77	75.43	-	-
M547	870	Eggerthella lenta	Species	Eggerthella lenta	54.25	87.38	Eggerthella	55.86	87.16	Eggerthella lenta	81.41
M548	800	Eubacterium eligens	Species	Eubacterium eligens	66.88	87.82	Eubacterium	67.38	87.81	Eubacterium eligens	88.4
M549	4309	Bacteroides	Genus	Bacteroides fragilis	10.47	77.8	Bacteroides	38.64	77.34	Bacteroides caccae	80.91
M550	2819	Alistipes shahii	Species	Alistipes shahii	59.31	87.01	Alistipes	65.63	86.49	Alistipes shahii	90.64
M551	3243	Bifidobacterium bifidum	Species	Bifidobacterium bifidum	95.13	99.28	Bifidobacterium	97.69	98.84	Bifidobacterium bifidum	99.05
M552	3783	Clostridium	Genus	Ruminococcus torques	8.17	77.23	Ruminococcus	8.17	77.23	Clostridium scindens	81.49
M553	1513	Unclassified	NA	Eubacterium sulci	5.22	76.61	Eubacterium	6.35	78.64	-	-
M554	1664	Unclassified	NA	Eubacterium sulci	7.51	75.35	Eubacterium	7.75	75.47	-	-
M555	2541	Unclassified	NA	Bacteroides dorei	4.05	75.11	Bacteroides	15.78	74.97	-	-
M556	3069	Unclassified	NA	Roseburia intestinalis	4.24	77.06	Roseburia	6.52	77.17	-	-
M557	3813	Unclassified	NA	Roseburia hominis	3.83	76.86	Roseburia	7.71	77.02	-	-
M558	3535	Unclassified	NA	Ruminococcus bicirculans	5.77	76.38	Ruminococcus	11.34	76.35	-	-
M559	1570	Unclassified	NA	Acholeplasma palmae	0.64	73.97	Clostridium	2.68	74.24	Eubacterium hallii	59.36
M560	1571	Unclassified	NA	Coprococcus catus	11.2	76.81	Coprococcus	11.27	76.85	Blautia hansenii	71.82
M561	969	Unclassified	NA	Coprococcus catus	19.09	76.13	Coprococcus	19.09	76.13	unclassified Lachnospiraceae	72.56
M562	1881	Unclassified	NA	Flavonifractor plautii	3.3	76.84	Flavonifractor	3.3	76.84	-	-
M563	2079	Prevotella	Genus	Prevotella denticola	15.68	77.4	Prevotella	36.03	77.41	Prevotella multiformis	79.7
M564	726	Unclassified	NA	Oscillibacter sp. PEA192	7.99	79.83	Oscillibacter	8.82	79.61	-	-
M565	2441	Sutterella	Genus	Sutterella megalosphaeroides	35.35	81.7	Sutterella	35.35	81.7	Sutterella wadsworthensis	78.87
M566	2351	Coprococcus	Genus	Coprococcus sp. ART55/1	33.94	78.66	Coprococcus	34.45	78.61	unnamed Clostridium sp. L2-50	81.5
M567	3560	Desulfovibrio	Genus	Desulfovibrio piger	9.02	78.58	Desulfovibrio	14.16	78.02	Desulfovibrio piger	75.14
M568	3608	Unclassified	NA	Ruminococcus bromii	0.78	76.69	Ruminococcus	1.83	75.48	-	-
M569	1425	Unclassified	NA	Clostridium botulinum	1.12	73.58	Clostridium	3.51	73.68	-	-
M570	2707	Sutterella	Genus	Sutterella megalosphaeroides	27.26	81.19	Sutterella	27.26	81.19	Sutterella wadsworthensis	78.54
M571	2010	Eubacterium	Genus	Eubacterium eligens	11.14	76.74	Eubacterium	15.77	76.83	Eubacterium eligens	69.42
M572	2854	Unclassified	NA	Flavonifractor plautii	7.29	77.01	Flavonifractor	7.29	77.01	-	-
M573	1431	Unclassified	NA	Parabacteroides sp. YL27	14.33	77.11	Parabacteroides	14.54	77.08	-	-
M574	4533	Unclassified	NA	Azospirillum lipoferum	0.62	75.77	Azospirillum	1.32	75.43	-	-
M575	2407	Clostridium	Genus	Clostridium sporogenes	8.72	79.66	Clostridium	10.05	79.07	Clostridium spiroforme	88.83
M576	1107	Unclassified	NA	Ruminococcus sp. SR1/5	7.05	77.8	Roseburia	10.21	76.29	-	-
M577	4822	Bacteroides	Genus	Bacteroides fragilis	24.93	79.08	Bacteroides	52.45	78.67	Bacteroides ovatus	83.32
M578	3259	Unclassified	NA	Ruminococcus bicirculans	7.18	76.88	Ruminococcus	15.5	76.98	Ruminococcus flavefaciens	73.8
M579	2079	Monoglobus pectinilyticus	Species	Monoglobus pectinilyticus	98.08	98.95	Monoglobus	98.08	98.95	-	-
M580	2255	Unclassified	NA	Ruminococcus champanellensis	17.29	77.03	Ruminococcus	19.38	76.94	-	-
M581	1967	Unclassified	NA	Roseburia intestinalis	4.58	75.74	Roseburia	6.1	75.95	unclassified Lachnospiraceae	70.13
M582	3763	Unclassified	NA	Ethanoligenens harbinense	3.06	74.78	Ethanoligenens	3.06	74.78	unnamed Ruminococcaceae bacterium D16	65.12
M583	916	Unclassified	NA	Eubacterium sulci	4.48	77.29	Eubacterium	4.59	77.15	-	-
M584	891	Unclassified	NA	Ethanoligenens harbinense	3.59	76.15	Ethanoligenens	3.59	76.15	-	-
M585	3624	Desulfovibrio fairfieldensis	Species	Desulfovibrio fairfieldensis	92.52	97.92	Desulfovibrio	93.07	97.81	unnamed Desulfovibrio sp. 3_1_syn3	98.98
M586	1501	Ruminococcus	Genus	butyrate-producing bacterium SS3/4	10.13	78.93	butyrate-producing	11.26	78.82	unnamed butyrate-producing bacterium SS3/4	84.96
M587	1878	Unclassified	NA	Lachnoclostridium sp. YL32	10.06	76.85	butyrate-producing	10.81	77.87	-	-
M588	2833	Ruminococcaceae bacterium D16	Species	Clostridiales bacterium CCNA10	35.16	82.89	Clostridiales	35.16	82.89	unnamed Ruminococcaceae bacterium D16	98.24
M589	2839	Collinsella	Genus	Collinsella aerofaciens	13.63	80.74	Collinsella	13.63	80.74	Collinsella stercoris	81.68
M590	2156	Unclassified	NA	Eubacterium eligens	15.86	76.83	Eubacterium	18.23	77.04	-	-
M591	1924	Unclassified	NA	Desulfitobacterium hafniense	0.52	75.91	Paenibacillus	1.51	78.26	-	-
M592	3602	Unclassified	NA	Eubacterium sulci	5.66	75.73	Eubacterium	5.94	75.67	-	-
M593	755	Oscillibacter	Genus	Oscillibacter valericigenes	36.29	78.32	Oscillibacter	37.22	81.18	Oscillibacter valericigenes	79.45
M594	2430	Ruminococcus	Genus	Ruminococcus sp. SR1/5	23.95	77.93	Ruminococcus/Blautia	42.96	77.91	unnamed Ruminococcus sp. 5_1_39BFAA	82.36
M595	1030	Ruminococcus	Genus	Ruminococcus sp. SR1/5	22.82	77.77	Ruminococcus/Blautia	44.37	77.74	-	-
M596	3010	Unclassified	NA	Clostridium clariflavum	0.86	73.85	Clostridium	1.89	74.01	-	-
M597	2267	Unclassified	NA	Coprococcus catus	11.29	76.96	Coprococcus	11.38	76.97	-	-
M598	1629	Unclassified	NA	Clostridium botulinum	0.86	75.17	Clostridium	2.7	74.72	-	-
M599	4388	Clostridium	Genus	Clostridium sp. SY8519	8.36	76.64	Clostridium	8.43	76.63	unnamed Clostridium sp. SY8519	75.76
M600	1549	Unclassified	NA	Ruminococcus bromii	2.13	77.43	Ruminococcus	4.2	77.47	-	-
M601	1280	Unclassified	NA	Clostridium propionicum	4.06	75.54	Clostridium	5.63	75.88	-	-
M602	1038	Unclassified	NA	Eggerthella lenta	10.02	75.85	Eggerthella	14.84	76.12	-	-
M603	2436	Lachnospiraceae bacterium 2_1_46FAA	Species	Ruminococcus torques	14.37	76.42	Ruminococcus	14.37	76.42	unnamed Lachnospiraceae bacterium 2_1_46FAA	99.83
M604	1056	Unclassified	NA	Clostridium propionicum	5.97	76.1	Clostridium	7.48	76.27	-	-
M605	2745	Unclassified	NA	Flavonifractor plautii	5.17	77.87	Flavonifractor	5.17	77.87	-	-
M606	1371	Unclassified	NA	Clostridium botulinum	4.96	75.85	Clostridium	12.98	75.49	-	-
M607	1201	Unclassified	NA	Clostridium propionicum	5.58	75.19	Clostridium	6.74	75.15	-	-
M608	973	Unclassified	NA	Clostridium propionicum	7.3	76.23	Clostridium	7.81	76.06	-	-
M609	2630	Unclassified	NA	Ruminococcus bromii	4.33	74.66	Ruminococcus	6.43	75.14	-	-
M610	1170	Unclassified	NA	Clostridium botulinum	1.11	74.03	Clostridium	3.16	74.25	-	-
M611	1978	Roseburia	Genus	Clostridium sp. SY8519	13.09	77.37	Clostridium	13.09	77.37	Roseburia hominis	76.43
M612	2745	Desulfovibrio	Genus	Desulfovibrio fairfieldensis	41.93	80.56	Desulfovibrio	62.22	80.46	unnamed Desulfovibrio sp. 3_1_syn3	83.76
M613	1211	Phascolarctobacterium	Genus	Phascolarctobacterium faecium	31.13	82.73	Phascolarctobacterium	60.86	82.75	Phascolarctobacterium succinatutens	76.99
M614	2464	Unclassified	NA	Acholeplasma palmae	0.93	74.22	Acholeplasma	1.7	74.27	-	-
M615	2097	Unclassified	NA	Burkholderiales bacterium YL45	3.24	75.25	Burkholderiales	3.24	75.25	-	-
M616	1718	Unclassified	NA	Ruminococcus bromii	7.22	76.28	Ruminococcus	9.43	76.33	-	-
M617	2034	Bifidobacterium animalis	Species	Bifidobacterium animalis	99.41	99.65	Bifidobacterium	99.71	99.62	Bifidobacterium animalis	99.94
M618	2369	Sutterella	Genus	Sutterella megalosphaeroides	6.46	79.17	Sutterella	6.46	79.17	Sutterella wadsworthensis	75.14
M619	3275	Coprobacillus	Genus	Clostridium sporogenes	7.54	79.65	Clostridium	9.34	78.84	unnamed Coprobacillus sp. 29_1	88.54
M620	1570	Unclassified	NA	Clostridium botulinum	2.23	74.57	Clostridium	6.5	74.73	-	-
M621	1877	Unclassified	NA	Alistipes finegoldii	5.81	75.68	Alistipes	9.11	75.98	-	-
M622	745	Unclassified	NA	Ethanoligenens harbinense	3.76	75.24	Ethanoligenens	3.76	75.24	-	-
M623	2269	Unclassified	NA	Barnesiella viscericola	16.17	76.32	Barnesiella	16.17	76.32	-	-
M624	1322	Unclassified	NA	Rhodospirillum rubrum	0.98	73.53	Rhodospirillum	0.98	73.53	-	-
M625	791	Unclassified	NA	Clostridium botulinum	0.88	75.07	Clostridium	2.4	75.29	-	-
M626	836	Faecalibacterium	Genus	Faecalibacterium prausnitzii	86.36	84.19	Faecalibacterium	86.36	84.19	Faecalibacterium prausnitzii	89.6
M627	1424	Unclassified	NA	Ruthenibacterium lactatiformans	19.03	79.37	Ruthenibacterium	19.03	79.37	-	-
M628	1580	Prevotella	Genus	Prevotella dentalis	18.29	76.45	Prevotella	32.78	76.5	Prevotella dentalis	77.51
M629	1502	Parabacteroides	Genus	Parabacteroides distasonis	30.63	77.04	Parabacteroides	30.63	77.04	Parabacteroides merdae	82.78
M630	1014	Unclassified	NA	Ruminiclostridium sp. KB18	2.17	74.54	Ruminiclostridium	2.47	74.46	-	-
M631	794	Klebsiella oxytoca	Species	Klebsiella oxytoca	93.32	99.32	Klebsiella	96.98	99.05	Klebsiella oxytoca	96.28
M632	735	Blautia	Genus	Blautia sp. YL58	14.42	77.09	Blautia	22.86	76.95	Blautia hansenii	76.65
M633	1076	Eubacterium biforme	Species	Faecalitalea cylindroides	25.19	77.82	Faecalitalea	25.19	77.82	Eubacterium biforme	91.27
M634	2931	Klebsiella oxytoca	Species	Klebsiella oxytoca	98.36	99.62	Klebsiella	99.66	99.53	Klebsiella oxytoca	94.04
M635	755	Unclassified	NA	Clostridium botulinum	5.17	75.44	Clostridium	12.58	75	-	-
M636	1494	Prevotella	Genus	Prevotella dentalis	6.76	75.64	Prevotella	27.24	75.51	Prevotella oris	74.54
M637	1930	Unclassified	NA	Ethanoligenens harbinense	1.5	74.4	Ethanoligenens	1.5	74.4	-	-
M638	1367	Lactobacillus fermentum	Species	Lactobacillus fermentum	98.83	99.65	Lactobacillus	99.49	99.61	Lactobacillus fermentum	99.78
M639	1861	Unclassified	NA	Eubacterium eligens	7.74	76.23	Eubacterium	12.41	76.23	-	-
M640	1497	Unclassified	NA	Roseburia intestinalis	7.95	76.89	Roseburia	11.29	76.8	-	-
M641	2084	Flavonifractor	Genus	Flavonifractor plautii	29.17	79	Flavonifractor	29.17	79	Pseudoflavonifractor capillosus	81.6
M642	1165	Ruminococcus	Genus	Blautia sp. YL58	11.24	76.55	Ruminococcus/Blautia	24.98	76.98	[Ruminococcus] obeum	78.15
M643	1005	Ruminococcus sp. SR1/5	Species	Ruminococcus sp. SR1/5	81.19	85.15	Ruminococcus	81.19	85.15	unnamed Ruminococcus sp. SR1/5	90.36
M644	1073	Parabacteroides merdae	Species	Parabacteroides distasonis	41.85	76.95	Parabacteroides	41.85	76.95	Parabacteroides merdae	92.64
M645	894	Clostridium	Genus	Clostridium botulinum	16.78	77.38	Clostridium	53.47	77.53	-	-
M646	2476	Kluyvera	Genus	Kluyvera intermedia	41.6	86.97	Kluyvera	72.78	86.53	Citrobacter youngae	85.18
M647	728	Unclassified	NA	Clostridium botulinum	0.55	73.36	Clostridium	1.24	73.52	-	-
M648	2530	Flavonifractor	Genus	Flavonifractor plautii	29.29	80.43	Flavonifractor	29.29	80.43	Pseudoflavonifractor capillosus	84.91
M649	1938	Bacteroides	Genus	Bacteroides caccae	20.33	86.21	Bacteroides	75.7	86.27	Bacteroides ovatus	87.26
M650	1226	Lachnoclostridium	Genus	Lachnoclostridium sp. YL32	27.65	77.82	Lachnoclostridium	27.65	77.82	unnamed Clostridiales bacterium 1_7_47FAA	82.27
M651	834	Weissella cibaria	Species	Weissella cibaria	66.79	82.14	Weissella	69.9	82.22	Weissella cibaria	94.33
M652	1855	Eubacterium	Genus	Eubacterium eligens	36.82	77.99	Eubacterium	37.79	77.99	Eubacterium eligens	80.48
M653	1511	Desulfovibrio	Genus	Desulfovibrio desulfuricans	34.68	79.88	Desulfovibrio	61.35	79.49	Desulfovibrio desulfuricans	83.49
M654	1216	Unclassified	NA	Ethanoligenens harbinense	0.49	72.98	Selenomonas	0.66	74.56	-	-
M655	1021	Unclassified	NA	Clostridium botulinum	4.02	75.26	Clostridium	11.85	75.85	-	-
M656	1362	Clostridioides	Genus	Clostridioides difficile	34.43	78.58	Clostridioides	34.43	78.58	[Clostridium] difficile	81.82
M657	1172	Unclassified	NA	Faecalibacterium prausnitzii	0.85	75.7	uncultured bacterium	1.11	76.26	-	-
M658	1244	Eubacterium	Genus	Eubacterium eligens	50.32	78.63	Eubacterium	52.01	78.67	Eubacterium eligens	72.21
M659	972	Unclassified	NA	Coprococcus catus	9.47	76.6	Coprococcus	9.57	76.56	-	-
M660	1627	Clostridium	Genus	Clostridium botulinum	15.43	77.51	Clostridium	51.51	77.53	-	-
M661	2079	Unclassified	NA	Ruminococcus bicirculans	5.24	76.05	Ruminococcus	12.12	75.74	-	-
M662	899	Ruminococcus	Genus	Ruminococcus torques	20.13	76.88	Ruminococcus	20.13	76.88	unnamed Lachnospiraceae bacterium 2_1_46FAA	83.21
M663	1354	Blautia	Genus	Blautia obeum	56.57	81.03	Blautia	56.72	81.03	[Ruminococcus] obeum	85
M664	1866	Eubacterium	Genus	Eubacterium eligens	41.1	78.37	Eubacterium	43.57	78.36	Eubacterium eligens	78.59
M665	970	Unclassified	NA	Flavonifractor plautii	2.58	75.4	Flavonifractor	2.58	75.4	-	-
M666	928	Unclassified	NA	Faecalibacterium prausnitzii	2.69	74.87	Faecalibacterium	2.69	74.87	-	-
M667	1009	Unclassified	NA	Flavonifractor plautii	11.99	76.88	Flavonifractor	11.99	76.88	-	-
M668	1388	Unclassified	NA	Flavonifractor plautii	2.38	75.99	Flavonifractor	2.38	75.99	-	-
M669	933	Unclassified	NA	Acholeplasma palmae	1.61	74.37	Clostridium	2.36	73.75	-	-
M670	765	Bacteroides	Genus	Bacteroides dorei	58.3	80.52	Bacteroides	80.13	79.97	Bacteroides dorei/vulgatus	86.64
M671	1646	Clostridium	Genus	Clostridium saccharolyticum	17.01	77.79	Clostridium	27.83	77.84	Clostridium saccharolyticum	73.91
M672	1055	Enterobacter hormaechei	Species	Enterobacter hormaechei	98.2	99.76	Enterobacter	99.43	99.75	Enterobacter hormaechei/cloacae	87.15
M673	753	Clostridium	Genus	Clostridium botulinum	14.87	78.12	Clostridium	51.53	78.24	-	-
M674	1936	Ruminococcus	Genus	Ruminococcus torques	19.94	76.9	Ruminococcus	20.2	76.9	unclassified Lachnospiraceae	81.88
M675	786	Prevotella buccae	Species	Prevotella dentalis	25.19	77.3	Prevotella	49.36	77.55	Prevotella buccae	99.3
M676	1305	Unclassified	NA	Ruminococcus champanellensis	5.13	76	Ruminococcus	5.75	75.88	-	-
M677	1125	Clostridium	Genus	Clostridium botulinum	12.98	77.41	Clostridium	50.67	77.8	-	-
M678	2099	Marvinbryantia	Genus	Blautia sp. YL58	4.76	75.79	Blautia	6.62	75.89	Marvinbryantia formatexigens	84.2
M679	1289	Eubacterium dolichum	Species	Erysipelotrichaceae bacterium I46	30.02	76.6	Erysipelotrichaceae	30.02	76.6	Eubacterium dolichum	99.7
M680	1462	Unclassified	NA	Flavonifractor plautii	10.05	76.14	Flavonifractor	10.05	76.14	-	-
M681	1848	Fusobacterium ulcerans	Species	Fusobacterium ulcerans	93.29	98.53	Fusobacterium	97.4	98.16	Fusobacterium ulcerans	99.7
M682	1228	Clostridium perfringens	Species	Clostridium perfringens	96.82	99.49	Clostridium	96.91	99.47	Clostridium perfringens	98.05
M683	805	Oxalobacter formigenes	Species	Oxalobacter formigenes	98.76	99.09	Oxalobacter	98.76	99.09	Oxalobacter formigenes	99.75
M684	933	Unclassified	NA	Clostridium botulinum	3.11	74.87	Clostridium	10.83	74.69	-	-
M685	1871	Clostridioides difficile	Species	Clostridioides difficile	99.25	99.53	Clostridioides	99.25	99.53	[Clostridium] difficile	99.28
M686	1658	Clostridioides	Genus	butyrate-producing bacterium SS3/4	24.85	77.72	butyrate-producing bacterium	25.63	77.75	unnamed butyrate-producing bacterium SS3/4	79.81
M687	1332	Victivallis vadensis	Species	Victivallales bacterium CCUG 44730	27.18	81.66	Victivallales	27.18	81.66	Victivallis vadensis	98.01
M688	1524	Oscillibacter	Genus	Oscillibacter valericigenes	18.18	76.66	Oscillibacter	18.18	76.66	Oscillibacter valericigenes	76.74
M689	758	Faecalibacterium prausnitzii	Species	Faecalibacterium prausnitzii	94.46	90.29	Faecalibacterium	94.46	90.29	Faecalibacterium prausnitzii	93.63
M690	740	Ruminococcus	Genus	Ruminococcus torques	16.22	76.22	Ruminococcus	16.22	76.22	unnamed Lachnospiraceae bacterium 2_1_46FAA	85.63
M691	1658	Roseburia	Genus	Eubacterium rectale	19.24	78.21	Roseburia	22.26	77.17	Roseburia inulinivorans	73.47
M692	1061	Unclassified	NA	Ethanoligenens harbinense	0.66	72.43	Clostridium	1.79	73.99	-	-
M693	993	Lactococcus garvieae	Species	Lactococcus garvieae	95.17	94.54	Lactococcus	96.78	94.36	Lactococcus garvieae	95.2
M694	1648	Clostridium	Genus	Clostridium botulinum	15.05	76.94	Clostridium	48.3	77.59	unnamed Clostridium sp. 7_2_43FAA	76.37
M695	1394	Unclassified	NA	Ruminiclostridium sp. KB18	0.79	74.93	Clostridium	1.36	74.64	-	-
M696	1610	Enterobacter hormaechei	Species	Enterobacter hormaechei	76.96	99.43	Enterobacter	98.26	99.32	Enterobacter hormaechei/cloacae	96.81
M697	1975	Faecalibacterium	Genus	Faecalibacterium prausnitzii	21.47	78.02	Faecalibacterium	21.47	78.02	Subdoligranulum variabile	78.07
M698	903	Unclassified	NA	Faecalibacterium prausnitzii	2.21	78.6	Faecalibacterium	2.21	78.6	-	-
M699	1475	Ruminococcus	Genus	Ruminococcus torques	29.69	78.06	Ruminococcus	29.83	78.07	[Ruminococcus] torques	80.43
M700	1648	Unclassified	NA	Faecalibacterium prausnitzii	1.94	75.32	Ruminococcus	2.31	76.5	-	-
M701	1061	Alistipes shahii	Species	Alistipes shahii	51.93	86.91	Alistipes	59.85	86.15	Alistipes shahii	90.86
M702	1852	Clostridium	Genus	Clostridium botulinum	13.66	77.36	Clostridium	50.05	77.58	Clostridium perfringens	75.45
M703	1483	Ruminococcus	Genus	Ruminococcus champanellensis	13.42	76.07	Ruminococcus	15.17	75.86	Ruminococcus champanellensis	75.84
M704	1722	Unclassified	NA	Faecalibacterium prausnitzii	2.32	76.86	uncultured bacterium	2.61	76.81	-	-
M705	1015	Unclassified	NA	Ruminococcus champanellensis	1.97	73.38	Ruminococcus	2.56	74.04	-	-
M706	1539	Clostridium	Genus	Clostridium botulinum	9.62	76.85	Clostridium	28.98	76.89	Clostridium sporogenes/botulinum	74.26
M707	938	Intestinimonas	Genus	Intestinimonas butyriciproducens	44.03	81.73	Intestinimonas	44.03	81.73	Pseudoflavonifractor capillosus	83.9
M708	907	Faecalibacterium	Genus	Faecalibacterium prausnitzii	28.22	77.3	Faecalibacterium	28.22	77.3	-	-
M709	1187	Unclassified	NA	Faecalibacterium prausnitzii	1.68	77.16	Ruminococcus	2.95	75.69	-	-
M710	836	Roseburia	Genus	Roseburia intestinalis	34.45	78.31	Roseburia	37.44	78.18	Roseburia intestinalis	76.24
M711	962	Pseudoflavonifractor	Genus	Flavonifractor plautii	12.37	78.43	Flavonifractor	12.37	78.43	Pseudoflavonifractor capillosus	77.62
M712	1038	Lactobacillus crispatus	Species	Lactobacillus crispatus	88.82	98.6	Lactobacillus	94.51	96.21	Lactobacillus crispatus	97.26
M713	981	Unclassified	NA	Flavonifractor plautii	7.44	76.02	Flavonifractor	7.44	76.02	-	-
M714	740	Lachnoclostridium	Genus	Lachnoclostridium sp. YL32	25	78.11	Lachnoclostridium	25	78.11	unnamed Clostridiales bacterium 1_7_47FAA	83.47
M715	1078	Unclassified	NA	Eubacterium sulci	6.4	75.97	Eubacterium	7.51	76.65	-	-
M716	921	Unclassified	NA	Clostridium botulinum	3.37	74.55	Clostridium	11.94	74.72	-	-
M717	1522	Unclassified	NA	Lachnospiraceae bacterium GAM79	4.8	78.38	Lachnospiraceae	5.12	78.12	unnamed Lachnospiraceae bacterium 3_1_57FAA_CT1	79.53
M718	1058	Unclassified	NA	Flavonifractor plautii	4.16	76.14	Faecalibacterium	4.16	75.79	-	-
M719	1184	Unclassified	NA	Flavonifractor plautii	13.34	77.04	Flavonifractor	13.34	77.04	-	-
M720	1142	Unclassified	NA	Flavonifractor plautii	11.73	78.31	Flavonifractor	11.73	78.31	Pseudoflavonifractor capillosus	68.77
M721	1228	Faecalibacterium	Genus	Faecalibacterium prausnitzii	69.87	81.1	Faecalibacterium	69.87	81.1	Faecalibacterium prausnitzii	87.04
M722	773	Unclassified	NA	Faecalibacterium prausnitzii	6.08	76.56	Faecalibacterium	6.08	76.56	-	-
M723	2619	Bacteroides	Genus	Bacteroides dorei	15.85	77.47	Bacteroides	40.89	76.87	Bacteroides dorei/vulgatus	80.78
M724	1940	Unclassified	NA	Flavonifractor plautii	8.97	76.53	Flavonifractor	8.97	76.53	unnamed Ruminococcaceae bacterium D16	73.02
M725	2750	Unclassified	NA	Blautia sp. YL58	2.76	75.26	Blautia	3.13	75.45	unnamed Lachnospiraceae bacterium 3_1_57FAA_CT1	75.04
M726	719	Enterobacter hormaechei	Species	Enterobacter hormaechei	83.73	99.25	Enterobacter	99.44	99.2	Enterobacter hormaechei/cloacae	92.91
M727	1079	Unclassified	NA	Acholeplasma palmae	1.58	74.11	Acholeplasma	2.59	74.38	-	-
M728	962	Turicibacter sp. H121	Species	Turicibacter sp. H121	95.22	98.61	Turicibacter	95.22	98.61	Turicibacter sanguinis	82.88
M729	1190	Parabacteroides	Genus	Parabacteroides distasonis	32.77	76.81	Parabacteroides	32.77	76.81	-	-
M730	1541	Unclassified	NA	Flavonifractor plautii	3.37	76.97	Flavonifractor	3.37	76.97	-	-
M731	1109	Unclassified	NA	Treponema brennaborense	0.54	76.49	Treponema	0.63	75.82	-	-
M732	1592	Clostridium	Genus	Clostridium saccharolyticum	12.25	77.01	Clostridium	13.07	77.6	Clostridium symbiosum	88.41
M733	985	Unclassified	NA	Flavonifractor plautii	3.76	76.16	Flavonifractor	3.76	76.16	-	-
M734	1135	Holdemania filiformis	Species	Erysipelotrichaceae bacterium I46	1.76	74.16	Erysipelotrichaceae	1.76	74.16	Holdemania filiformis	92.89
M735	811	Flavonifractor	Genus	Flavonifractor plautii	47.84	80.9	Flavonifractor	47.84	80.9	Pseudoflavonifractor capillosus	72.59
M736	793	Clostridium	Genus	Clostridium botulinum	16.52	78.28	Clostridium	48.42	78	unnamed Clostridium sp. 7_2_43FAA	87.16
M737	2054	Alistipes shahii	Species	Alistipes shahii	66.6	87.8	Alistipes	72.74	87.12	Alistipes shahii	90.52
M738	901	Pyramidobacter piscolens	Species	Fretibacterium fastidiosum	7.1	76.11	Fretibacterium	7.1	76.11	Pyramidobacter piscolens	99.96
M739	1608	Unclassified	NA	Flavonifractor plautii	7.34	76.65	Flavonifractor	7.34	76.65	-	-
M740	1548	Oscillibacter	Genus	Oscillibacter sp. PEA192	42.57	82.32	Oscillibacter	44.77	82.15	Oscillibacter valericigenes	80.65
M741	1072	Lactobacillus paracasei	Species	Lactobacillus paracasei	96.92	99.38	Lactobacillus	99.53	99	Lactobacillus casei	96.14
M742	795	Acidaminococcus intestini	Species	Acidaminococcus intestini	99.37	99.29	Acidaminococcus	99.5	99.26	Acidaminococcus intestini	90.57
M743	1298	Prevotella	Genus	Prevotella dentalis	18.72	76.28	Prevotella	38.83	76.56	Prevotella multiformis	76.38
M744	1166	Citrobacter werkmanii	Species	Citrobacter werkmanii	97.34	99.56	Citrobacter	98.28	99.47	unnamed Citrobacter sp. 30_2	89.53
M745	1643	Unclassified	NA	Erysipelotrichaceae bacterium I46	14.42	75.78	Erysipelotrichaceae	14.42	75.78	-	-
M746	1229	Roseburia	Genus	Roseburia intestinalis	25.55	78.25	Roseburia	38.16	77.87	Roseburia intestinalis	75.24
M747	1116	Prevotella	Genus	Prevotella dentalis	10.84	75.48	Prevotella	35.04	76.28	Prevotella copri	81.73
M748	1129	Faecalibacterium	Genus	Faecalibacterium prausnitzii	23.91	77.51	Faecalibacterium	23.91	77.51	Subdoligranulum variabile	76.76
M749	824	Unclassified	NA	Eubacterium siraeum	3.03	76.19	Ruminococcus	4.13	75.71	-	-
M750	1279	Unclassified	NA	Flavonifractor plautii	8.84	76.61	Flavonifractor	8.84	76.61	unnamed Ruminococcaceae bacterium D16	73.05
M751	1543	Clostridium	Genus	Clostridium sporogenes	20.03	81.5	Clostridium	20.61	81.3	Clostridium spiroforme	82.11
M752	1251	Unclassified	NA	Eubacterium siraeum	0.96	73.9	uncultured bacterium	1.04	74.85	-	-
M753	1160	Faecalibacterium	Genus	Faecalibacterium prausnitzii	24.83	78.2	Faecalibacterium	24.83	78.2	Subdoligranulum variabile	77.4
M754	1466	Eubacterium	Genus	Eubacterium eligens	8.46	76.13	Eubacterium	10.37	76.85	Eubacterium ventriosum	76.06
M755	986	Unclassified	NA	Flavonifractor plautii	4.77	77.18	Flavonifractor	4.77	77.18	-	-
M756	1828	Unclassified	NA	Eubacterium siraeum	0.93	75.08	Ruminococcus	1.81	74.18	-	-
M757	1960	Unclassified	NA	Ruminiclostridium sp. KB18	0.61	74.99	Ruminiclostridium	1.02	74.59	-	-
M758	2065	Clostridium	Genus	Clostridium saccharolyticum	13.46	76.02	Clostridium	13.61	75.99	Clostridium bolteae	77.6
M759	958	Coprobacillus sp. 29_1	Species	Clostridium sporogenes	6.78	78.68	Clostridium	8.87	77.64	unnamed Coprobacillus sp. 29_1	99.94
M760	847	Unclassified	NA	Ethanoligenens harbinense	4.01	75.72	Ethanoligenens	4.01	75.72	-	-
M761	1355	Unclassified	NA	Clostridium botulinum	3.17	75.37	Clostridium	8.71	74.77	-	-
M762	869	Unclassified	NA	Oscillibacter valericigenes	13	75.37	Oscillibacter	13	75.37	-	-
M763	1290	Unclassified	NA	Ruminiclostridium sp. KB18	12.56	75.83	Ruminiclostridium	12.56	75.83	-	-
M764	1772	Unclassified	NA	Eubacterium sulci	6.43	75.24	Eubacterium	6.77	75.14	-	-
M765	1289	Clostridium bolteae	Species	Clostridium bolteae	96.43	98.38	Clostridium	96.51	98.36	Clostridium bolteae	98.48
M766	1157	Unclassified	NA	Eubacterium sulci	6.14	75.44	Eubacterium	6.22	75.46	-	-
M767	873	Prevotella	Genus	Prevotella dentalis	29.32	77.25	Prevotella	39.75	77.06	Prevotella multisaccharivorax	72.95
M768	1600	Mordavella sp. Marseille-P3756	Species	Mordavella sp. Marseille-P3756	91.19	95.95	Mordavella	91.19	95.95	Clostridium scindens	81.1
M769	1946	Clostridium	Genus	Clostridium botulinum	16.34	77.79	Clostridium	47.43	77.57	unnamed Clostridium sp. 7_2_43FAA	80.9
M770	1265	Flavonifractor	Genus	Flavonifractor plautii	32.09	79.81	Flavonifractor	32.09	79.81	Pseudoflavonifractor capillosus	82.26
M771	1238	Lachnoclostridium	Genus	Lachnoclostridium sp. YL32	28.35	78.24	Lachnoclostridium	28.43	78.22	Clostridium bolteae	81.93
M772	1109	Megasphaera	Genus	Megasphaera elsdenii	40.49	78.32	Megasphaera	40.49	78.32	Megasphaera elsdenii	73.81
M773	1635	Unclassified	NA	Eubacterium sulci	4.34	74.97	Eubacterium	4.95	75.28	-	-
M774	974	Unclassified	NA	Flavonifractor plautii	5.75	76.12	Flavonifractor	5.75	76.12	-	-
M775	856	Unclassified	NA	Clostridium botulinum	0.93	75.42	Clostridium	3.5	74.42	-	-
M776	1059	Klebsiella variicola	Species	Klebsiella variicola	93.67	99.57	Klebsiella	99.72	99.54	-	-
M777	716	Ruminococcus bicirculans	Species	Ruminococcus bicirculans	92.74	98.14	Ruminococcus	93.58	98.03	Ruminococcus albus	79.15
M778	865	Unclassified	NA	Ruminococcus champanellensis	0.58	73.83	Christensenella	1.16	76.72	-	-
M779	2307	Cloacibacillus	Genus	Cloacibacillus porcorum	73.21	84.84	Cloacibacillus	73.21	84.84	-	-
M780	727	Lactobacillus paracasei	Species	Lactobacillus paracasei	96.7	99.85	Lactobacillus	99.17	99.61	Lactobacillus casei	99.23
M781	2011	Cloacibacillus porcorum	Species	Cloacibacillus porcorum	99.85	98.93	Cloacibacillus	99.85	98.93	-	-
M782	2317	Klebsiella michiganensis	Species	Klebsiella michiganensis	87.48	98.62	Klebsiella	97.76	98.84	Klebsiella oxytoca	98.71
M783	980	Unclassified	NA	Ruminiclostridium sp. KB18	16.22	75.81	Ruminiclostridium	16.22	75.81	-	-
M784	3476	Clostridium	Genus	Lachnoclostridium sp. YL32	11.74	77.27	Lachnoclostridium	11.8	77.27	Clostridium bolteae	79.72
M785	1052	Clostridium	Genus	Clostridium botulinum	14.16	77.56	Clostridium	47.15	77.84	-	-
M786	1689	Unclassified	NA	Ruminiclostridium sp. KB18	1.89	75.38	Ruminococcus	2.37	75.18	-	-
M787	2313	Clostridium	Genus	Clostridium botulinum	11.46	77.57	Clostridium	45.4	77.37	unnamed Clostridium sp. 7_2_43FAA	80.98
M788	1041	Enterobacter roggenkampii	Species	Enterobacter roggenkampii	80.98	98.92	Enterobacter	98.75	98.81	Enterobacter cancerogenus	91.71
M789	1133	Blautia	Genus	Blautia obeum	65.14	81.24	Blautia	65.49	81.23	[Ruminococcus] obeum	87.18
M790	930	Clostridium	Genus	Clostridium propionicum	26.56	76.13	Clostridium	27.31	76.17	-	-
M791	2300	Clostridium	Genus	Lachnoclostridium sp. YL32	18.43	76.82	Lachnoclostridium	18.48	76.81	Clostridium bolteae	80.04
M792	1031	Unclassified	NA	Oscillibacter sp. PEA192	16.88	78.97	Oscillibacter	18.43	78.7	-	-
M793	2991	Bacteroides dorei	Species	Bacteroides dorei	54.6	86.4	Bacteroides	69.94	85.74	Bacteroides dorei/vulgatus	89.67
M794	1667	Enterococcus faecium	Species	Enterococcus faecium	99.94	99.84	Enterococcus	99.94	99.84	Enterococcus faecium	99.43
M795	999	Unclassified	NA	Clostridium botulinum	4.9	76.08	Clostridium	15.32	75.81	-	-
M796	2837	Blautia sp. YL58	Species	Blautia sp. YL58	71.98	94.58	Blautia	84.28	93.44	Blautia hansenii	71.39
M797	881	Unclassified	NA	Clostridium botulinum	4.65	74.8	Clostridium	11.24	74.35	-	-
M798	705	Unclassified	NA	Flavonifractor plautii	7.8	76.33	Flavonifractor	7.8	76.33	-	-
M799	848	Flavonifractor	Genus	Flavonifractor plautii	32.31	79.89	Flavonifractor	32.31	79.89	Pseudoflavonifractor capillosus	80.43
M800	1442	Mitsuokella multacida	Species	Selenomonas ruminantium	24.06	78.35	Selenomonas	56.52	78.03	Mitsuokella multacida	95.38
M801	2563	Enterobacter aerogenes	Species	Klebsiella aerogenes	98.09	99.56	Klebsiella	98.71	99.54	Enterobacter aerogenes	99.26
M802	1025	Escherichia coli	Species	Escherichia coli	94.93	99.8	Escherichia	94.93	99.8	unnamed Citrobacter sp. 30_2	98.45
M803	967	Megasphaera elsdenii	Species	Megasphaera elsdenii	95.97	98.59	Megasphaera	96.07	98.82	Megasphaera elsdenii	99.12
M804	2299	Blautia	Genus	Blautia sp. YL58	31.1	77.02	Blautia	38.63	80.95	Blautia hansenii	80.71
M805	1379	Fusobacterium	Genus	Fusobacterium varium	29.22	81.5	Fusobacterium	65.92	81.52	Fusobacterium varium	87.14
M806	1077	Unclassified	NA	Eubacterium siraeum	3.25	75.89	Ruminococcus	6.13	75.74	-	-
M807	1832	Unclassified	NA	Ruminococcus champanellensis	0.82	74.1	Clostridium	2.02	74.15	-	-
M808	1235	Prevotella	Genus	Prevotella dentalis	16.92	76.18	Prevotella	41.94	76.99	Prevotella copri	78.39
M809	1443	Unclassified	NA	Flavonifractor plautii	7.69	76.29	Flavonifractor	7.69	76.29	-	-
M810	1586	Unclassified	NA	Monoglobus pectinilyticus	2.46	78.63	Ruminococcus	3.4	76.41	-	-
M811	1101	Erysipelotrichaceae	Genus	Erysipelotrichaceae bacterium GAM147	43.78	88.48	Erysipelotrichaceae	43.78	88.48	-	-
M812	2491	Unclassified	NA	Clostridium saccharolyticum	13.25	77	Clostridium	15.21	78.05	-	-
M813	994	Unclassified	NA	Ruminiclostridium sp. KB18	15.9	76.51	Ruminiclostridium	15.9	76.51	-	-
M814	1982	Unclassified	NA	Lachnospiraceae bacterium GAM79	14.93	80.1	Lachnospiraceae	15.54	79.89	Roseburia inulinivorans	72.58
M815	3602	Parabacteroides	Genus	Parabacteroides distasonis	29.87	76.93	Parabacteroides	29.87	76.93	Parabacteroides merdae	83.18
M816	1701	Flavonifractor	Genus	Flavonifractor plautii	19.22	78.26	Flavonifractor/Intestinimonas	27.04	78.26	Pseudoflavonifractor capillosus	76.54
M817	2507	Blautia producta	Species	Blautia producta	89.83	98.32	Blautia	92.5	98	Blautia hansenii	79.93
M818	723	Unclassified	NA	Flavonifractor plautii	3.87	76.87	Flavonifractor	3.87	76.87	-	-
M819	1058	Burkholderiales	Genus	Burkholderiales bacterium YL45	31.57	75.72	Burkholderiales	31.57	75.72	Parasutterella excrementihominis	86.77
M820	988	Unclassified	NA	Roseburia intestinalis	11.84	75.88	Roseburia	14.07	75.95	-	-
M821	747	Unclassified	NA	Oscillibacter valericigenes	13.79	75.75	Oscillibacter	13.79	75.75	-	-
M822	858	Clostridioides	Genus	butyrate-producing bacterium SS3/4	25.41	78	butyrate-producing bacterium	27.16	77.92	unnamed butyrate-producing bacterium SS3/4	87.1
M823	781	Flavonifractor	Genus	Flavonifractor plautii	54.8	81.54	Flavonifractor	54.8	81.54	Pseudoflavonifractor capillosus	85.07
M824	700	Clostridioides	Genus	butyrate-producing bacterium SS3/4	36.14	77.4	butyrate-producing bacterium	37.43	77.4	-	-
M825	1898	Bacteroides	Genus	Bacteroides helcogenes	52.58	82.22	Bacteroides	73.55	81.36	Bacteroides fluxus	85.58
M826	1278	Klebsiella michiganensis	Species	Klebsiella michiganensis	94.29	99.6	Klebsiella	99.3	99.75	Klebsiella oxytoca	99.35
M827	722	Desulfovibrio	Genus	Desulfovibrio desulfuricans	35.18	80.22	Desulfovibrio	60.94	80.04	Desulfovibrio desulfuricans	86.81
M828	976	Roseburia	Genus	Roseburia intestinalis	31.15	77.49	Roseburia	34.02	77.49	Roseburia intestinalis	78.2
M829	2020	Unclassified	NA	Alistipes shahii	3.37	75.82	Alistipes	5.59	75.6	-	-
M830	861	Roseburia	Genus	Roseburia intestinalis	18.93	77.77	Roseburia	30.89	78	Roseburia inulinivorans	70.56
M831	810	Collinsella	Genus	Collinsella aerofaciens	20.37	81.32	Collinsella	20.37	81.32	Collinsella stercoris	84.67
M832	1289	Dialister	Genus	Dialister sp. Marseille-P5638	22.11	81.15	Dialister	22.11	81.15	Dialister invisus	77.52
M833	1014	Blautia hydrogenotrophica	Species	Ruminococcus sp. SR1/5	8.19	75.35	Blautia	13.71	76.99	Blautia hydrogenotrophica	97.92
M834	1073	Unclassified	NA	Dialister sp. Marseille-P5638	18.17	79.85	Dialister	18.27	79.83	-	-
M835	2216	Butyricimonas	Genus	Butyricimonas faecalis	37.18	82.39	Butyricimonas	37.18	82.39	-	-
M836	984	Lactobacillus vaginalis	Species	Lactobacillus reuteri	50.2	77.87	Lactobacillus	60.06	78.03	Lactobacillus vaginalis	93.9
M837	1287	Ruminococcus	Genus	Ruminococcus torques	28.13	77.5	Ruminococcus	28.28	77.53	unnamed Lachnospiraceae bacterium 1_4_56FAA	88.85
M838	1308	Flavonifractor	Genus	Flavonifractor plautii	21.48	78.37	Flavonifractor	21.48	78.37	Pseudoflavonifractor capillosus	79.53
M839	1406	Parabacteroides	Genus	Parabacteroides distasonis	20.34	76.11	Parabacteroides	20.34	76.11	-	-
M840	1383	Coprobacillus	Genus	Erysipelotrichaceae bacterium SG0102	7.3	78.45	Erysipelotrichaceae	12.22	78.21	unnamed Coprobacillus sp. 29_1	76.02
M841	1442	Ruminococcus	Genus	Ruminococcus bicirculans	19.97	77.44	Ruminococcus	30.31	77.7	Ruminococcus albus	74.7
M842	1299	Lactobacillus plantarum	Species	Lactobacillus plantarum	99.38	99.89	Lactobacillus	99.85	99.89	Lactobacillus plantarum	98.62
M843	804	Candidatus Melainabacteria	Genus	Candidatus Melainabacteria bacterium MEL.A1	28.73	80.78	Candidatus Melainabacteria	28.73	80.78	-	-
M844	1010	Unclassified	NA	Eggerthella sp. YY7918	6.73	74.36	Eggerthella	7.92	74.33	-	-
M845	711	Unclassified	NA	Parabacteroides distasonis	6.05	76.3	Bacteroides	8.16	77.12	-	-
M846	768	Clostridioides	Genus	Clostridioides difficile	33.85	77.47	Clostridioides	33.85	77.47	-	-
M847	1684	Citrobacter freundii	Species	Citrobacter freundii	94.77	99.58	Citrobacter	98.16	99.56	unnamed Citrobacter sp. 30_2	96.46
M848	971	Alistipes shahii	Species	Alistipes shahii	65.5	92.24	Alistipes	72.5	91.27	Alistipes shahii	93.18
M849	1102	Flavonifractor	Genus	Flavonifractor plautii	31.31	79.71	Flavonifractor	31.31	79.71	unnamed Ruminococcaceae bacterium D16	81.5
M850	2294	Parabacteroides	Genus	Parabacteroides distasonis	33.13	77.36	Parabacteroides	33.13	77.36	Parabacteroides merdae	83.09
M851	704	Unclassified	NA	Ruminiclostridium sp. KB18	11.22	76.45	Ruminiclostridium	11.22	76.45	-	-
M852	716	Unclassified	NA	Clostridium botulinum	3.91	75.14	Clostridium	8.52	75.12	-	-
M853	2343	Enterococcus faecalis	Species	Enterococcus faecalis	99.27	99.83	Enterococcus	99.36	99.83	Enterococcus faecalis	99.53
M854	1476	Oscillibacter	Genus	Oscillibacter valericigenes	14.57	76.6	Oscillibacter	14.57	76.6	Oscillibacter valericigenes	76.61
M855	1019	Unclassified	NA	Clostridium saccharolyticum	16.09	76.37	Clostridium	16.39	76.29	-	-
M856	1229	Unclassified	NA	Clostridium botulinum	4.31	75.71	Clostridium	12.53	75.22	-	-
M857	1260	Unclassified	NA	Ruminococcus bromii	2.22	75.35	Ruminococcus	3.57	74.99	-	-
M858	2683	Parabacteroides	Genus	Parabacteroides distasonis	34.1	77.23	Parabacteroides	34.1	77.23	Parabacteroides merdae	82.38
M859	825	Ruminococcus	Genus	Ruminococcus torques	25.45	78.45	Ruminococcus	25.45	78.45	Dorea longicatena	82.67
M860	1753	Unclassified	NA	Victivallales bacterium CCUG 44730	2.97	77.43	Victivallales	2.97	77.43	-	-
M861	996	Flavonifractor plautii	Species	Flavonifractor plautii	78.11	85.63	Flavonifractor	78.11	85.63	Pseudoflavonifractor capillosus	85.31
M862	1696	Clostridium	Genus	Clostridium botulinum	14.5	78.57	Clostridium	53.66	77.99	unnamed Clostridium sp. 7_2_43FAA	79.79
M863	1881	Bacteroides	Genus	Bacteroides cellulosilyticus	77.51	84.18	Bacteroides	83.04	83.82	Bacteroides intestinalis	89.01
M864	1125	Unclassified	NA	Eubacterium eligens	3.2	76.06	Clostridium	8.18	74.63	-	-
M865	953	Flavonifractor	Genus	Flavonifractor plautii	15.53	79.22	Flavonifractor/Intestinimonas	23.29	79.22	Pseudoflavonifractor capillosus	72.14
M866	833	Unclassified	NA	Ruminiclostridium sp. KB18	0.6	74.98	Christensenella	1.08	74.41	-	-
M867	805	Unclassified	NA	Ruminococcus champanellensis	13.91	76.93	Ruminococcus	17.27	76.91	-	-
M868	1081	Unclassified	NA	Prevotella dentalis	5.09	74.64	Prevotella	11.66	75.57	-	-
M869	1140	Parabacteroides	Genus	Parabacteroides distasonis	25.96	76.96	Parabacteroides	25.96	76.96	Parabacteroides merdae	88.13
M870	1712	Clostridium	Genus	Clostridium saccharolyticum	4.56	76.59	Clostridium	4.56	76.59	Clostridium bolteae	74.2
M871	1088	Lachnoclostridium	Genus	Lachnoclostridium sp. YL32	30.79	78.04	Lachnoclostridium	30.79	78.04	Clostridium bolteae	80.87
M872	1188	Butyrivibrio	Genus	Eubacterium eligens	12.79	76.62	Eubacterium	16.16	76.86	Butyrivibrio crossotus	89.14
M873	1613	Lachnoclostridium	Genus	Lachnoclostridium sp. YL32	31.62	76.61	Lachnoclostridium	31.87	76.58	unnamed Clostridiales bacterium 1_7_47FAA	75.27
M874	1949	Unclassified	NA	Megamonas hypermegale	11.13	76.25	Pelosinus	13.7	75.6	-	-
M875	1681	Enterobacter cloacae	Species	Enterobacter cloacae	93.69	99.16	Enterobacter	99.46	99.43	Enterobacter hormaechei/cloacae	92.24
M876	1414	Lactobacillus salivarius	Species	Lactobacillus salivarius	96.11	99.5	Lactobacillus	96.75	99.45	Lactobacillus salivarius	99.18
M877	1305	Oxalobacter formigenes	Species	Oxalobacter formigenes	97.39	99.55	Oxalobacter	97.39	99.55	Oxalobacter formigenes	99.99
M878	816	Blautia	Genus	Blautia obeum	60.54	81.1	Blautia	61.03	81.04	[Ruminococcus] obeum	88.07
M879	3633	Lachnospiraceae bacterium 3_1_57FAA_CT1	Species	Blautia sp. YL58	4.24	75.61	Blautia	4.95	75.8	unnamed Lachnospiraceae bacterium 3_1_57FAA_CT1	99
M880	1245	Unclassified	NA	Eubacterium eligens	9.88	76.06	Eubacterium	13.33	76.21	Butyrivibrio crossotus	72.46
M881	1087	Unclassified	NA	Ruminococcus bromii	5.61	75.87	Ruminococcus	8.92	75.73	-	-
M882	1843	Unclassified	NA	Faecalibacterium prausnitzii	2.55	75.95	uncultured bacterium	4.45	76.62	-	-
M883	903	Flavonifractor	Genus	Clostridiales bacterium CCNA10	32.12	82.65	Clostridiales	32.12	82.65	unnamed Ruminococcaceae bacterium D16	85.76
M884	1071	Unclassified	NA	Flavonifractor plautii	6.16	76.5	Flavonifractor	6.16	76.5	-	-
M885	1439	Unclassified	NA	Blautia sp. YL58	5.7	76.63	Blautia	6.67	76.75	-	-
M886	3027	Raoultella planticola	Species	Raoultella planticola	94.22	99.65	Raoultella	96.83	99.58	Klebsiella oxytoca	87.34
M887	1351	Unclassified	NA	Erysipelotrichaceae bacterium I46	14.73	76.18	Erysipelotrichaceae	14.73	76.18	-	-
M888	1623	Unclassified	NA	Flavonifractor plautii	4.31	76.73	Flavonifractor	4.31	76.73	-	-
M889	1728	Unclassified	NA	Candidatus Melainabacteria bacterium MEL.A1	4.22	77.98	Candidatus	4.28	77.91	-	-
M890	1090	Unclassified	NA	Flavonifractor plautii	2.84	76.51	uncultured bacterium	3.67	76.91	-	-
M891	717	Prevotella copri	Species	uncultured bacterium	14.92	94.82	Prevotella	38.63	78.78	Prevotella copri	94.24
M892	1772	Bacteroides clarus	Species	Bacteroides helcogenes	32.51	79.63	Bacteroides	71.61	79.15	Bacteroides clarus	90.32
M893	983	Unclassified	NA	Clostridium botulinum	5.9	76.45	Clostridium	18.51	76.45	-	-
M894	746	Pyramidobacter piscolens	Species	Fretibacterium fastidiosum	7.51	76.42	Fretibacterium	7.51	76.42	Pyramidobacter piscolens	98.62
M895	1834	Clostridium saccharolyticum	Species	Clostridium saccharolyticum	77.37	99.38	Clostridium	77.43	99.36	Clostridium saccharolyticum	99.62
M896	1548	Faecalibacterium	Genus	Faecalibacterium prausnitzii	26.74	78.27	Faecalibacterium	26.74	78.27	Subdoligranulum variabile	73.6
M897	1498	Streptococcus sobrinus	Species	Streptococcus sobrinus	97.26	99.5	Streptococcus	98.13	99.43	Streptococcus downei	88.71
M898	931	Prevotella	Genus	uncultured bacterium	15.57	95.77	Prevotella	33.83	78.44	Prevotella copri	86.13
M899	1582	Coprobacillus	Genus	Erysipelotrichaceae bacterium GAM147	8.66	79.42	Erysipelotrichaceae	9.54	79.21	unnamed Coprobacillus sp. 29_1	84.37
M900	1206	Roseburia	Genus	Roseburia hominis	6.47	75.95	Roseburia	7.55	75.74	unnamed Lachnospiraceae bacterium 3_1_57FAA_CT1	79.92

## Sheet: ST10
Supplementary Table 10| ESRD-enriched and healthy control-enriched MGSs with genus or species level taxonomic assignment.
Taxanomic name	Total number of MGSs	No. of MGSs enriched in ESRD patients	No. of MGSs enriched in healthy controls
Akkermansia muciniphila	2	1	0
Alistipes spp.	7	1	0
Alistipes finegoldii	3	2	0
Alistipes shahii	11	5	0
Anaerostipes spp.	1	1	0
Bacteroides cellulosilyticus	13	2	0
Bacteroides fragilis	2	1	0
Bifidobacterium dentium	1	1	0
Blautia spp.	15	7	3
Clostridioides difficile	1	1	0
Clostridium saccharolyticum	1	1	0
Desulfovibrio	5	2	0
Desulfovibrio fairfieldensis	1	1	0
Eggerthella lenta	2	2	0
Enterococcus faecalis	1	1	0
Enterococcus faecium	2	1	0
Erysipelotrichaceae spp.	2	1	0
Flavonifractor plautii	2	2	0
Fusobacterium spp.	4	2	1
Intestinimonas butyriciproducens	1	1	0
Lactobacillus spp.	1	1	0
Lactobacillus amylovorus	1	1	0
Lactobacillus casei	2	2	0
Lactobacillus fermentum	1	1	0
Lactobacillus plantarum	1	1	0
Parabacteroides spp.	14	7	0
Streptococcus infantarius	1	1	0
Streptococcus thermophilus	1	1	0
Weissella spp.	2	2	0
Burkholderiales spp.	4	0	4
butyrate-producing bacterium SS3/4	2	0	2
Coprococcus spp.	2	0	2
Eubacterium rectale	1	0	1
Faecalibacterium prausnitzii	13	0	5
Prevotella spp.	21	4	15
Roseburia spp.	13	1	6
Roseburia intestinalis	2	0	2
Ruminococcus bicirculans	2	0	2
Ruminococcus torques	2	0	2
Selenomonas spp.	1	0	1
Note: Yellow and green highlight ESRD-enriched species/genera and healthy control-enriched species/genera, respectively.

[truncated: 7 more sheets: ST11, ST12, ST13, ST14, ST15, ST16, ST17]
